# Supplementary material
Source: publisher figshare collection journal article supplement (https://diabetesjournals.figshare.com/ndownloader/files/25828106)
Supplement: Supplementary file 1 [file 25828106]

**Appendix A: Diabetes drugs included in analysis**

| **Therapy Category** | **Drug** |
| --- | --- |
| **Basal Insulins** | Biosimilar insulin glargine |
| Insulin degludec |
| Insulin detemir |
| Insulin glargine |
| Insulin glargine U300 |
| **Rapid-Acting Insulin** | Biosimilar insulin lispro |
| FIAsp |
| Insulin aspart |
| Insulin glulisine |
| Insulin lispro |
| Rapid-acting insulin |
| Technosphere insulin |
| **Basal Insulin/GLP-1 Agonist Fixed Ratio Combinations** | Insulin degludec/liraglutide |
| Insulin glargine/lixisenatide |
| **GLP-1 Agonists** | Albiglutide |
| Dulaglutide |
| Exenatide twice daily |
| Exenatide once weekly |
| Liraglutide |
| Lixisenatide |
| Semaglutide |
| **SGLT-2 Inhibitors** | Canagliflozin |
| Dapagliflozin |
| Empagliflozin |
| Ertugliflozin |
| **Sulfonylureas** | | Glibenclamide | | --- | | Gliclazide | | Glimepiride | | Glipizide | |
| **Metformin** | | Fortamet | | --- | | Glucophage | | Glumetza | | Riomet | |
| **Thiazolidinediones** | | Pioglitazone | | --- | | Rosiglitazone | |
| **DPP-4 Inhibitors** | Alogliptin |
| Linagliptin |
| Saxagliptin |
| Sitagliptin |
| **Amylin Analog** | Pramlintide |

**Appendix B: Trials included in analysis**

| Year | NCT Identifier | Title |
| --- | --- | --- |
| 2000 | NCT00333723 | AVANDIA With Glyburide In African American And Hispanic Patients With Type 2 Diabetes Not Controlled by Glyburide Alone |
| 2000 | NCT01520818 | Comparison of Biphasic Human Insulin 30 With Biphasic Insulin Aspart in Subjects With Diabetes |
| 2000 | NCT01509755 | Comparison of Liraglutide and Glimepiride on Blood Sugar Control in Subjects With Type 2 Diabetes |
| 2000 | NCT00279045 | Diabetes Study With Rosiglitazone Monotherapy Versus Metformin Or Glyburide/Glibenclamide |
| 2000 | NCT00653341 | Effect of Insulin Glargine in Insulin Naive Subjects With Type 2 Diabetes on Oral Hypoglycemic Agent(s) |
| 2000 | NCT02526615 | Effects of Rosiglitazone and Metformin on Metabolism in Type 2 Diabetes (ROSI) |
| 2000 | NCT00032487 | Glycemic Control and Complications in Diabetes Mellitus Type 2 (VADT) (VADT) |
| 2000 | NCT00179400 | Insulin Action in Individuals With Type 2 Diabetes by Natural Fatty Acids or the Medication Pioglitazone |
| 2000 | NCT01620333 | Pharmacokinetics of Biphasic Insulin Aspart 50 and 70 in Japanese Healthy Volunteers |
| 2000 | NCT00194896 | Preferred Treatment of Type 1.5 Diabetes |
| 2000 | NCT00500955 | Rosiglitazone on Microalbuminuria in Type 2 Diabetics |
| 2000 | NCT01650129 | Safety and Efficacy of Biphasic Insulin Aspart 50 in Subjects With Type 2 Diabetes |
| 2000 | NCT00065130 | Safety and Efficacy of Insulin Aspart vs. Regular Human Insulin in Gestational Diabetes |
| 2000 | NCT00494312 | Safety Study of Pioglitazone Compared To Glyburide on Liver Function |
| 2000 | NCT00331487 | Study to Compare Pioglitazone and Rosiglitazone in Subjects With Type 2 Diabetes Mellitus and Dyslipidemia |
| 2001 | NCT00537251 | 32 Week, Open, Randomized, 2 Way Cross Over Multicentre Trial to Compare Safety & Efficacy of Combination of HOE901 Insulin Analogue Once Daily at Bedtime + Lispro Insulin Before Meals vs NPH Insulin (Twice a Day) + Regular in Type 1 Diabetes Mellitus |
| 2001 | NCT00035542 | A Research Study to Determine the Safety and Efficacy of Glucovance Compared to Metformin and Glyburide in Children and Adolescents With Type 2 Diabetes. |
| 2001 | NCT00145925 | Blood Pressure and Glucose Lowering for the Prevention of Vascular Disease in High Risk Patients With Type 2 Diabetes |
| 2001 | NCT00174824 | Comparison of Insulin Glargine and NPH Human Insulin in Progression of Diabetic Retinopathy in Type 2 Diabetic Patients |
| 2001 | NCT01511159 | Comparison of Liraglutide Inhaled Into the Lungs Compared to Liraglutide Injected Under the Skin in Healthy Male Volunteers |
| 2001 | NCT01526941 | Comparison of Single Dose and Steady State Pharmacodynamics of Biphasic Insulin Aspart 30 and 70 in Subjects With Type 1 Diabetes |
| 2001 | NCT00501020 | Comparison of the Efficacy and Tolerability of the Addition of AVANDIA to Submaximal Doses of Metformin |
| 2001 | NCT00046462 | Determine Whether Glycemic Control is Different Between Lantus & a 3rd Oral Agent When Failure With Other Treatment |
| 2001 | NCT01509742 | Effect of Liraglutide on Glucagon Secretion in Subjects With Type 2 Diabetes |
| 2001 | NCT01508923 | Effect of Liraglutide on Glucose Profiles and Gastric Emptying in Subjects With Type 2 Diabetes |
| 2001 | NCT01511185 | Effect of Liraglutide on the Beta-cell Responsiveness in Subjects With Type 2 Diabetes Compared to a Healthy Control Group |
| 2001 | NCT01508949 | Effect of Liraglutide on Weight and Appetite in Obese Subjects With Type 2 Diabetes |
| 2001 | NCT00118950 | Effect of Metformin Versus Repaglinide Treatment in Non-Obese Type 2 Diabetic Patients Uncontrolled by Diet |
| 2001 | NCT01605773 | Effect of Repaglinide on Postprandial Lipemia in Type 2 Diabetes |
| 2001 | NCT01704378 | Efficacy and Safety of Biphasic Insulin Aspart 30 FlexPen in Subjects With Type 2 Diabetes |
| 2001 | NCT01511198 | Efficacy and Safety of Metformin and Liraglutide in Obese Subjects With Type 2 Diabetes Previously Treated With an Oral Hypoglycemic Agent |
| 2001 | NCT00036504 | Efficacy and Safety of Twice-Daily Insulin Lispro Low Mixture Compared to a Once-Daily Long Acting Insulin Comparator in Patients Who Have Been Using One or More Oral Antihyperglycemic Agents Without Insulin |
| 2001 | NCT00521742 | Efficacy of Pioglitazone Compared to Glyburide in Treating Subjects With Type 2 Diabetes Mellitus and Mild Cardiac Disease |
| 2001 | NCT00174993 | Efficacy of Pioglitazone on Macrovascular Outcome in Patients With Type 2 Diabetes (PROactive) |
| 2001 | NCT00044447 | Evaluate the Role of Adding Amaryl to Non-Insulin Dependent Diabetes Mellitus Patients Unresponsive to Maximum Dose Metformin & Thiazolidinedione |
| 2001 | NCT03220425 | Evaluation of the Efficacy and Safety of Insulin Detemir Compared With That of NPH Insulin in Subjects With Type 1 Diabetes. |
| 2001 | NCT01697657 | Frequency of Hypoglycaemic Episodes During Treatment With Insulin Detemir in Well Controlled Subjects With Type 1 Diabetes |
| 2001 | NCT00290043 | Glulisine Pre- and Postmeal |
| 2001 | NCT00384215 | Insulin Glargine [rDNA Origin] Injection vs Pioglitazone as add-on Therapy in Patients Failing Monotherapy With Sulfonylurea or Metformin |
| 2001 | NCT00783744 | Insulin Glargine Combination Therapies in Type II Diabetics (LAPTOP) |
| 2001 | NCT00358124 | Insulin Glargine v Rosiglitazone as add-on Therapy in Patients Failing Sulfonylurea and Metformin Combination Therapy |
| 2001 | NCT01336751 | Lantus Versus Humalog Mix as add-on Therapy in Type Diabetes Patients Failing Sulfonylurea and Metformin Combination Treatment |
| 2001 | NCT00279240 | Life Style Modifications Prevents Type 2 Diabetes in Asian Indians |
| 2001 | NCT01527539 | Long Term Safety and Efficacy of Biphasic Insulin Aspart 30 in Subjects With Type 2 Diabetes |
| 2001 | NCT01467375 | Long Term Safety and Efficacy of Biphasic Insulin Aspart 30 in Type 2 Diabetes |
| 2001 | NCT00449553 | Observational Study to Assess Glycosylated Hemoglobin Changes After 6 Months of Treatment With Pioglitazone. |
| 2001 | NCT01620424 | Pharmacokinetics and Pharmacodynamics of Biphasic Insulin Aspart 30 and 50 in Subjects With Type 2 Diabetes |
| 2001 | NCT01524809 | Pharmacokinetics of Biphasic Insulin Aspart 30 and 70 in Subjects With Type 1 Diabetes |
| 2001 | NCT00379769 | RECORD: Rosiglitazone Evaluated for Cardiac Outcomes and Regulation of Glycaemia in Diabetes (RECORD) |
| 2001 | NCT00313937 | SAM - Skip a Meal - Insulin Glargine, Diabetes Mellitus Type 1 |
| 2001 | NCT00095654 | The DREAM (Diabetes Reduction Assessment With Ramipril and Rosiglitazone Medication) Trial |
| 2002 | NCT00046150 | 12 Week, Comparing Safety of HMR1964 & Insulin Aspart Used in Continuous Subcutaneous Infusion in Type 1 Diabetes. |
| 2002 | NCT00563225 | 20 Week Bridging Study in Type II DM |
| 2002 | NCT00133718 | A 2 Year Trial of Patients With Type 2 Diabetes Focusing on Cardiovascular Diagnostics and Metabolic Control |
| 2002 | NCT00035568 | A Research Study to Assess the Mechanism By Which Glucovance, Metformin, and Glyburide Work To Control Glucose Levels In Patients With Type 2 Diabetes |
| 2002 | NCT00399724 | A Trial Comparing Lantus Algorithms to Achieve Normal Blood Glucose Targets in Subjects With Uncontrolled Blood Sugar With Type 2 Diabetes Mellitus |
| 2002 | NCT01527552 | Bioequivalence of Two Formulations of Biphasic Insulin Aspart 50 in Healthy Male Subjects |
| 2002 | NCT01527630 | Bioequivalence of Two Formulations of Biphasic Insulin Aspart 50 in Healthy Japanese Subjects |
| 2002 | NCT00598793 | Biphasic Insulin Aspart 30 in Type 2 Diabetes Failing OAD Therapy (INITIATE) |
| 2002 | NCT00046501 | Compare Blood Sugar Level Between Lantus in the Morning and Other Insulins in Type 1 Diabetes Adolescents |
| 2002 | NCT00312104 | Comparison of Efficacy and Safety of Insulin Detemir and Insulin Glargine in Patients With Type 1 Diabetes |
| 2002 | NCT00312156 | Comparison of Efficacy and Safety of Insulin Detemir and NPH Insulin in Children and Adolescents With Type 1 Diabetes |
| 2002 | NCT01486940 | Comparison of Insulin Detemir Plus Insulin Aspart With Insulin NPH Plus Human Soluble Insulin in Subjects With Type 1 Diabetes |
| 2002 | NCT01465152 | Comparison of Metformin, Repaglinide or the Combination of Both in Subjects With Type 2 Diabetes |
| 2002 | NCT01720290 | Comparison of Repaglinide and Metformin Administered Alone or in Combination in Type 2 Diabetes |
| 2002 | NCT00676819 | Comparison of the Pharmacodynamics and Pharmacokinetics of Insulin Aspart and Human Insulin in Elderly People With Type 2 Diabetes |
| 2002 | NCT01698697 | Comparison of Two Insulin Aspart Formulations in Healthy Volunteers |
| 2002 | NCT00633425 | Continuous Glucose Monitoring System (CGMS) in Type 2 Diabetic Patients Inadequately Controlled by Metformine Monotherapy; Analyze of Glycemic Profile Before and After Association of Glimepiride |
| 2002 | NCT01511172 | Effect of Liraglutide as add-on to Metformin Compared to Either Liraglutide or Metformin Alone, or to a Combination of Metformin and a SU (Sulphonylurea) Agent in Subjects With Type 2 Diabetes |
| 2002 | NCT00545857 | Effect of Pioglitazone on the Course of New Onset Type 1 Diabetes Mellitus |
| 2002 | NCT00549874 | Effect of Rosiglitazone on Myocardial Blood Flow Regulation in Type 2 Diabetes |
| 2002 | NCT00044460 | Efficacy and Safety In Poorly Controlled Type 2 Diabetics |
| 2002 | NCT00365170 | Efficacy and Safety of Insulin Aspart vs. Human Insulin During Pregnancy by Women With Type 1 Diabetes |
| 2002 | NCT01467401 | Efficacy and Safety of NovoMix® 30 in Subjects With Type 2 Diabetes |
| 2002 | NCT00568984 | Efficacy and Safety of Repaglinide and Metformin Combined in Type 2 Diabetes |
| 2002 | NCT00676260 | Efficacy of Pioglitazone on Microcirculation in Type 2 Diabetes Patients Treated With Insulin |
| 2002 | NCT01698931 | Efficacy of Repaglinide in Subjects With Type 2 Diabetes |
| 2002 | NCT00044707 | Evaluation of an Orally Administered Medication When Taken in Conjunction With Pramlintide |
| 2002 | NCT00042458 | Evaluation of Dose-titration of Pramlintide During Initiation of Therapy in Patients Trying to Improve Glucose Control |
| 2002 | NCT00042471 | Evaluation of the Bioavailability of Pramlintide |
| 2002 | NCT00042601 | Evaluation of the Effect of Pramlintide on Satiety and Food Intake |
| 2002 | NCT00044668 | Evaluation of the Effect on Glucose Control and Safety of AC2993 in Patients With Type 2 Diabetes Treated With Metformin, Sulfonylurea, or Metformin and Sulfonylurea Combination |
| 2002 | NCT00035984 | Evaluation of the Effect on Glucose Control of AC2993 in Patients With Type 2 Diabetes Mellitus |
| 2002 | NCT00039013 | Evaluation of the Effect on Glucose Control of AC2993 in Patients With Type 2 Diabetes Mellitus Treated With Metformin |
| 2002 | NCT00039026 | Evaluation of the Effect on Glucose Control of AC2993 in Patients With Type 2 Diabetes Mellitus Treated With a Sulfonylurea |
| 2002 | NCT01789957 | Extension Study for 2993-112 |
| 2002 | NCT00576862 | Extension to Study HMR1964A/3011 in Belgium |
| 2002 | NCT01487798 | Frequency of Episodes of Hypoglycaemia During Treatment With Biphasic Insulin Aspart 30 in Type 2 Diabetes |
| 2002 | NCT00280865 | GLAD: Dose-Finding, Efficacy, and Safety of AZ 242 (Tesaglitazar) in Subjects With Type 2 Diabetes |
| 2002 | NCT00608179 | Glimepiride Induced Insulin Secretion Will be Inhibited by Hypoglycemia |
| 2002 | NCT00353691 | Glimepiride vs Metformin as Monotherapy in Pediatric Subjects With Type 2 Diabetes Mellitus |
| 2002 | NCT01526980 | Glycaemic Control of Biphasic Insulin Aspart 70 and 30 in Subjects With Type 2 Diabetes |
| 2002 | NCT01697631 | Glycemic Control of Biphasic Insulin Aspart 30 in Type 2 Diabetes |
| 2002 | NCT00597233 | Human Insulin NPH and Insulin Aspart in Type 1 Diabetes |
| 2002 | NCT00191282 | Hyperglycemia and Cardiovascular Outcomes With Type 2 Diabetes |
| 2002 | NCT00071448 | Insulin Aspart vs. Insulin Lispro vs. Regular Insulin in Paediatric Population |
| 2002 | NCT00272090 | Insulin Glargine in Type 1 Diabetes Mellitus |
| 2002 | NCT00390728 | Insulin Glargine in Type I Diabetes Mellitus> Main Study "AT.LANTUS": A Trial Comparing Lantus Algorithms to Achieve Normal Blood Glucose Targets in Subjects With Uncontrolled Blood Sugar. Sub-study: "HALT"(Hypoglycaemia Avoidance With Lantus Trial) |
| 2002 | NCT00348972 | Lantus in Prediabetes |
| 2002 | NCT00551356 | Lispro Mix 25 vs. Glargine in Type 2 Diabetics |
| 2002 | NCT01486381 | Long Term Safety of Biphasic Insulin Aspart 30 in Juveniles With Type 1 Diabetes |
| 2002 | NCT00725036 | Long Term Safety Trial to Compare Insulin Treatment With Preprandial Inhaled Human Insulin to s.c. Insulin Aspart Both Combined With NPH in Subjects With Type 1 Diabetes |
| 2002 | NCT00513643 | Metabolic Effect of Insulin Aspart and Human Insulin in Different Doses |
| 2002 | NCT01394887 | Metformin & Inflammation in Pre-diabetic Children |
| 2002 | NCT01542450 | Pharmacokinetics of Insulin Detemir in Subjects With Type 1 Diabetes |
| 2002 | NCT01570660 | Phielix et al.: Hepatic Fat Content and Adipokines |
| 2002 | NCT00819325 | Prevention of Instent Renarrowing With Aggressive Glucose Lowering With Pioglitazone in Diabetic Patients (PPAR-G) |
| 2002 | NCT00540709 | PUMP STUDY MDI Lantus/Lispro vs Continuous Insulin+Lispro |
| 2002 | NCT00329225 | Rosiglitazone In Subjects With Type 2 Diabetes Mellitus Who Are Inadequately Controlled On Insulin |
| 2002 | NCT01467141 | Safety and Efficacy of Insulin Aspart in Children With Type 1 Diabetes |
| 2002 | NCT01649570 | Safety and Efficacy of Insulin Aspart in Type 2 Diabetes |
| 2002 | NCT01620463 | Safety, Tolerability, Pharmacokinetics and Pharmacodynamics of Liraglutide in Healthy Japanese Volunteers |
| 2002 | NCT01487382 | Special Survey for Paediatric Subjects |
| 2002 | NCT01487408 | Special Survey for Type 1 or Type 2 Diabetic Patients |
| 2002 | NCT01487369 | Special Survey of Production of Insulin Aspart Specific Antibody |
| 2002 | NCT00111540 | Study to Examine the Effect on Glucose Control and Safety/Tolerability of Exenatide Given Two Times a Day to Subjects With Type 2 Diabetes |
| 2002 | NCT00489229 | To Investigate the Effect of Rosiglitazone and Ramipril on Pre-clinical Vasculopathy in Diabetes and IGT Patients |
| 2002 | NCT00276393 | Treatment Trial Evaluating Long Acting Insulin in Type 1 Diabetes |
| 2003 | NCT00551538 | 24 Hour Plasma Glucose Profiles Comparing Lispro Mix 75/25 vs. Glargine |
| 2003 | NCT00139659 | A One Year Clinical Trial Assessing the Usefulness and Safety of Inhaled Insulin in Diabetics With Asthma |
| 2003 | NCT00238472 | A Pilot Study to Evaluate the Effects of Nateglinide vs. Glibenclamide on Renal Hemodynamics and Albumin Excretion |
| 2003 | NCT00219440 | A Portion-controlled Diet Will Prevent Weight Gain in Diabetics Treated With ACTOS (TAKE II) |
| 2003 | NCT00240370 | A Study to Evaluate Combining Metformin With Muraglitazar or Pioglitazone in Type 2 Diabetics |
| 2003 | NCT00067951 | A Study To Evaluate The Safety And Efficacy Of An Investigational Diabetes DrugIn Poorly Controlled Type II Diabetics |
| 2003 | NCT01487421 | An Observational Study of Insulin Aspart and, if Necessary, Insulin Levemir (FlexPen®) in the Evening or at Bedtime |
| 2003 | NCT00576368 | An Open Therapeutic Project to Confirm the Efficacy Tolerability and Safety Profile of Lantus in Everyday Medical Practice |
| 2003 | NCT01876849 | An Open-Label Study Examining the Long-Term Safety of Exenatide Given Twice Daily to Patients With Type 2 Diabetes Mellitus |
| 2003 | NCT00241605 | AVANDAMET Versus Metformin For Type 2 Diabetes Mellitus |
| 2003 | NCT01527643 | Bioequivalence of Two Formulations of Biphasic Insulin Aspart 50 in Healthy Subjects |
| 2003 | NCT01620437 | Bioequivalence of Two Formulations of Biphasic Insulin Aspart 50 in Japanese Subjects |
| 2003 | NCT01527565 | Bioequivalence of Two Formulations of Biphasic Insulin Aspart 70 in Healthy Male Subjects |
| 2003 | NCT01527656 | Bioequivalence of Two Formulations of Biphasic Insulin Aspart 70 in Healthy Subjects |
| 2003 | NCT00482183 | Comparison Between Pioglitazone and SES With type2 DM |
| 2003 | NCT01486914 | Comparison of Insulin Aspart Produced by Current Process and the NN2000 Process |
| 2003 | NCT00604656 | Comparison of Insulin Aspart Produced by the NN2000 Process to the Current Process in Type 1 Diabetes |
| 2003 | NCT00283751 | Comparison of Insulin Detemir or Insulin Glargine as Add on to Oral Antidiabetic Drugs in Type 2 Diabetes |
| 2003 | NCT00468364 | Comparison of Insulin Glargine and NPH Insulin at Night and at Hypoglycemia in Type 2 Diabetes |
| 2003 | NCT00612599 | Comparison of Pharmacodynamics and Pharmacokinetics of Biphasic Insulin Aspart 50 to Biphasic Insulin Aspart 70 in Type 2 Diabetes |
| 2003 | NCT00150410 | Demonstrate Exubera Works As Well As Avandia When Added To Sulfonylurea + Metformin In Controlling Glucose |
| 2003 | NCT00082381 | Effect of AC2993 Compared With Insulin Glargine in Patients With Type 2 Diabetes Also Using Combination Therapy With Sulfonylurea and Metformin |
| 2003 | NCT00280046 | Effect of Biphasic Insulin Aspart 30 on Blood Glucose Control in Subjects With Type 2 Diabetes |
| 2003 | NCT00085969 | Effect of Exenatide Monotherapy on Glucose Control in Subjects With Type 2 Diabetes Mellitus |
| 2003 | NCT00451620 | Effect of GlucoNorm vs Glyburide on Post-Prandial Hyperglycemia in Elderly Subjects With Type 2 Diabetes |
| 2003 | NCT00118937 | Effect of Metformin in Patients With Type-1 Diabetes With Inadequate Glycaemic Control by Insulin and Diet |
| 2003 | NCT00118963 | Effect of Repaglinide Versus Metformin Treatment in Non-Obese Patients With Type-2-Diabetes |
| 2003 | NCT00577590 | Effects of Fatty Acid Delivery on Heart Metabolism and Function in Type 2 Diabetes (T2DM (T2DM) |
| 2003 | NCT00191178 | Effects of Insulin in Perceived Mood Symptoms in Patients With Type 2 Diabetes |
| 2003 | NCT00619697 | Efficacy and Safety of Biphasic Insulin Aspart 30 in Combination With Metformin in Type 2 Diabetes (EUROMIX) |
| 2003 | NCT00605111 | Efficacy and Safety of Biphasic Insulin Aspart 30 in Subjects With Type 2 Diabetes |
| 2003 | NCT00617565 | Efficacy and Safety of Biphasic Insulin Aspart 30 in Type 1 or 2 Diabetes |
| 2003 | NCT00571935 | Efficacy and Safety of Insulin Aspart in MDI or CSII in Children Below 7 Years of Age With Type 1 Diabetes |
| 2003 | NCT00605020 | Efficacy and Safety of Insulin Detemir in Combination With Insulin Aspart and Biphasic Insulin Aspart 30 in Type 2 Diabetes |
| 2003 | NCT00595374 | Efficacy and Safety of Insulin Detemir in Type 1 Diabetes |
| 2003 | NCT00604253 | Efficacy and Safety of Insulin Detemir in Type 2 Diabetes Inadequately Controlled on OHA Therapy Alone |
| 2003 | NCT00290927 | Efficacy and Safety of Insulin Glulisine in Type 2 Diabetes Mellitus |
| 2003 | NCT00592969 | Efficacy and Safety of Metformin Plus Biphasic Insulin Aspart 30 in Type 2 Diabetes |
| 2003 | NCT00499707 | Efficacy and Safety Study of Rosiglitazone/Metformin Therapy vs Rosiglitazoneand Metformin in Type 2 Diabetes Subjects |
| 2003 | NCT00604344 | Efficacy and the Safety of Insulin Detemir in Subjects With Insulin Requiring Diabetes |
| 2003 | NCT00791895 | Efficacy of Biphasic Insulin Aspart 30 in Type 2 Diabetics Failing on OADs |
| 2003 | NCT00225264 | Efficacy Study of Pioglitazone and Glimepiride on the Rate of Progression of Atherosclerotic Disease. (CHICAGO) |
| 2003 | NCT00225277 | Efficacy Study of Pioglitazone Compared to Glimepiride on Coronary Atherosclerotic Disease Progression in Subjects With Type 2 Diabetes Mellitus (PERISCOPE) |
| 2003 | NCT00082407 | Exenatide Compared With Twice-Daily Biphasic Insulin Aspart in Patients With Type 2 Diabetes Using Sulfonylurea and Metformin |
| 2003 | NCT01045590 | Glibenclamide (Dose to be Titrated From Starting Dose of 5mg om) Plus Rosiglitazone 4mg om (Increased to 8mg om After 6 Months) and vs Glibenclamide (Dose to be Titrated With Starting Dose of 5mg om) Plus Placebo, Administered to Patients With Type 2 Diabetes Mellitus |
| 2003 | NCT00552370 | Glycemic Optimization Treatment Study |
| 2003 | NCT00572806 | Initiation of Insulin Aspart in Type 2 Diabetes |
| 2003 | NCT02962921 | Insulin Effects on Cardiac Function in Patients With Diabetes Mellitus |
| 2003 | NCT00686712 | Insulin Glargine at Bedtime or in AM Versus NPH |
| 2003 | NCT00642915 | Insulin Glargine Benefits in Japanese Pts Outside of Japan (US or Brazil) |
| 2003 | NCT00311818 | Insulin Glargine in Type 2 Diabetes Mellitus |
| 2003 | NCT00687453 | Insulin Glargine Versus Twice-Daily NPH |
| 2003 | NCT00222521 | Insulin Glargine Vs Standard Insulin Therapy |
| 2003 | NCT00565162 | Insulin Glargine, INITIATE Metabolic and Economic Outcomes of Lantus |
| 2003 | NCT02871180 | Late Night Snack and Insulin Glargine |
| 2003 | NCT00191464 | Long-Term Effects of Insulin Plus Metformin Regimens on the Overall and Postprandial Glycemic Control of Patients With Type 2 Diabetes |
| 2003 | NCT00965991 | Metformin Compared to Glyburide in Gestational Diabetes |
| 2003 | NCT00575172 | Nippon Ultra-Rapid Insulin and Diabetic Complication Evaluation-Study (NICE-Study) |
| 2003 | NCT01538576 | Paediatric Subjects - Special Survey |
| 2003 | NCT01497561 | Pharmacodynamics and Pharmacokinetics of Insulin Detemir in Subjects With Type 2 Diabetes |
| 2003 | NCT00653302 | Phenotype Evaluation in Insulin Naive Patients Using Lantus (Insulin Glargine) |
| 2003 | NCT00672919 | Pioglitazone Study of Triglyceride Changes in Subjects With Type 2 Diabetes After Conversion From Rosiglitazone. (COMPLEMENT) |
| 2003 | NCT00162240 | PPAR - Combination With Metformin |
| 2003 | NCT00162175 | PPAR-COMBO With Sulfonylurea |
| 2003 | NCT00232583 | Preservation of Beta-cell Function in Type 2 Diabetes Mellitus |
| 2003 | NCT00372086 | Rosiglitazone and Insulin in T1DM Adolescents |
| 2003 | NCT00604396 | Safety and Efficacy of Insulin Detemir in Combination With OAD in Type 2 Diabetes |
| 2003 | NCT01620476 | Safety and Tolerability of Liraglutide in Healthy Japanese Volunteers |
| 2003 | NCT01615978 | Safety and Tolerability of Liraglutide in Japanese Subjects With Type 2 Diabetes |
| 2003 | NCT00121966 | South Danish Diabetes Study: Evaluation of the Antidiabetic Treatment of Type 2 Diabetes Mellitus (SDDS) |
| 2003 | NCT01538589 | Special Survey for Patients With Type 1 or Type 2 Diabetes |
| 2003 | NCT00069836 | Study Of AVANDAMET® With Or Without Insulin In Type II Diabetes Mellitus Patients. AVANDAMET® is a Registered Trademark of the GSK Group of Companies. |
| 2003 | NCT00950599 | Study of Multiple Doses of Saxagliptin (BMS-477118) |
| 2003 | NCT00511602 | Study of the Efficacy and Safety of Inhaled Technosphere Insulin in Patients With Type 2 Diabetes |
| 2003 | NCT00145379 | The Effect of Metformin in Overweight Patients With Dysregulated Type 1 Diabetes Mellitus |
| 2003 | NCT00069784 | The ORIGIN Trial (Outcome Reduction With Initial Glargine Intervention) |
| 2003 | NCT00174681 | Tulip Study: Testing the Usefulness of Lantus When Initiated Prematurely In Patients With Type 2 Diabetes |
| 2003 | NCT00123643 | Vascular Effects of Rosiglitazone Versus Glyburide in Type 2 Diabetic Patients |
| 2004 | NCT00511732 | 18-Week, Randomized, Double- blind, Placebo Controlled, Forced Titration Study of Patients With Type 2 Diabetes |
| 2004 | NCT00116922 | A Lifestyle and Combination Medication Therapy Diabetes Prevention Study |
| 2004 | NCT00220961 | Actos Now for Prevention of Diabetes (ACT NOW) |
| 2004 | NCT00095056 | An Investigational Drug in Patients With Type 2 Diabetes Mellitus and Chronic Renal Insufficiency (0431-028)(COMPLETED) |
| 2004 | NCT00094757 | An Investigational Drug Study in Patients With Type 2 Diabetes Mellitus (MK0431-023) |
| 2004 | NCT00094770 | An Investigational Drug Study in Patients With Type 2 Diabetes Mellitus (0431-024) |
| 2004 | NCT02678676 | An Observational Study of Patient Cohorts Who Previously Received Long-term Treatment With Pioglitazone or Placebo in Addition to Existing Antidiabetic Medications |
| 2004 | NCT01294553 | An Open Label, Multi-centre, Non-interventional Post-marketing Surveillance to Monitor the Safety and/or Efficacy of AVANDAMET Between June 2004 and January 2010 (AVANDAMETPMS) |
| 2004 | NCT00754624 | An Open-label, Multi-center, International, Three-year, Safety and Tolerability 'Follow on' Trial |
| 2004 | NCT00553020 | Assessment of Duration of Metabolic Effect of a Single Bolus of sc Injected Lantus Compared to NPH Insulin in Patients With Type 2 Diabetes |
| 2004 | NCT00359112 | AVANDAMET Versus Metformin And Sulphonylurea In People With Poorly Controlled Type 2 Diabetes |
| 2004 | NCT00600626 | Basal Bolus of Insulin Aspart Including Insulin NPH and Biphasic Insulin Aspart in Type 2 Diabetes |
| 2004 | NCT00511719 | Bioavailability of Technosphere® Insulin Versus Subcutaneous Regular Human Insulin in Type 2 Diabetes |
| 2004 | NCT00934414 | Clamp Study Comparing Inhalation of Technosphere®/ Insulin in Smokers and Non- Smokers With Type 2 Diabetes |
| 2004 | NCT01637935 | Cohort Study of Pioglitazone and Bladder Cancer in Patients With Type II Diabetes |
| 2004 | NCT00369148 | Combination of Glinides With Premixed Insulin |
| 2004 | NCT00732524 | Combination of Sulfonylureas and Insulin Glargine Outpatient Therapy for Unstable Diabetes and Impending DKA |
| 2004 | NCT00099619 | Comparing Exenatide and Insulin Glargine in Type 2 Diabetes Patients for Whom Insulin is the Next Appropriate Therapy |
| 2004 | NCT00110370 | Comparing Pre-Mixed Insulin With Insulin Glargine Combined With Rapid-Acting Insulin in Patients With Type 2 Diabetes |
| 2004 | NCT00097279 | Comparison of Biphasic Insulin Aspart 70/30 With Anti-Diabetic Drugs in Subjects With Type 2 Diabetes (ACTION) |
| 2004 | NCT00564668 | Comparison of Biphasic Insulin Aspart Produced by the NN2000 Process to Current Process to in Type 2 Diabetes |
| 2004 | NCT01620450 | Comparison of Insulin Aspart Produced by Current Process and the NN2000 Process in Healthy Japanese |
| 2004 | NCT00184639 | Comparison of Insulin Detemir and Insulin Semilente®MC in Type 1 Diabetes |
| 2004 | NCT00760448 | Comparison of Insulin Detemir and NPH With Respect to Lowering the Blood Sugar and Symptoms Experienced by Type 1 Diabetics During Hypoglycaemia |
| 2004 | NCT00097084 | Comparison of Insulin Detemir Plus Insulin Aspart Against Insulin Glargine Plus Insulin Aspart in Type 2 Diabetes |
| 2004 | NCT00184665 | Comparison of Insulin Detemir With NPH Insulin in Type 1 Diabetes |
| 2004 | NCT00184600 | Comparison of Insulin Detemir, Insulin Aspart and Biphasic Insulin Aspart 30 With OAD Treatment in Type 2 Diabetes |
| 2004 | NCT00184626 | Comparison of Insulin Glargine Versus Biphasic Insulin Aspart 30/70 or Biphasic Insulin Aspart 30/70 in Combination With Metformin in Subjects With Type 2 Diabetes. |
| 2004 | NCT00461331 | Comparison of Insulins Aspart and Lispro in Insulin Pumps |
| 2004 | NCT01507337 | Comparison of the Effect of Liraglutide in Young Versus Elderly Healthy Volunteers |
| 2004 | NCT01508897 | Comparison of Two Liraglutide Formulations in Healthy Volunteers |
| 2004 | NCT00338104 | Conversion of Hyperglycemic Patients Being Treated With Intravenous Insulin Infusions to Lantus Insulin |
| 2004 | NCT00368394 | Dose-Exposure-Response in Type 1 Diabetes Mellitus |
| 2004 | NCT00419484 | Effect of Pioglitazone on Cardiovascular Outcome on Higashi-Saitama Trial in Patients With Type 2 Diabetes |
| 2004 | NCT00598013 | Effect of Pioglitazone on Insulin Resistance and Atherosclerosis in Renal Allograft Recipients Without Diabetes |
| 2004 | NCT00097500 | Effects of Exenatide and Insulin Glargine in Subjects With Type 2 Diabetes |
| 2004 | NCT00600366 | Efficacy and Safety of Biphasic Insulin Aspart 30 FlexPen® in Insulin Naive Subjects With Type 2 Diabetes |
| 2004 | NCT01542060 | Efficacy and Safety of Biphasic Insulin Aspart 30 for the Treatment of Type 2 Diabetes Mellitus |
| 2004 | NCT00624364 | Efficacy and Safety of Biphasic Insulin Aspart 30 With Metformin in Type 2 Diabetes |
| 2004 | NCT00593255 | Efficacy and Safety of Insulin Aspart in Subjects With Type 1 or Type 2 Diabetes |
| 2004 | NCT00290979 | Efficacy and Safety of Insulin Glulisine in Type 1 Diabetes Mellitus |
| 2004 | NCT00762736 | Efficacy and Safety of Pioglitazone and Azilsartan in Treating Subjects With Type 2 Diabetes Mellitus |
| 2004 | NCT00332488 | Efficacy and Safety of Prandial Inhalation of Technosphere/ Insulin in Combination With Metformin or Technosphere/ Insulin Alone Versus 2 Oral Anti- Diabetic Agents in Subjects With Type 2 Diabetes |
| 2004 | NCT00099866 | Efficacy and Safety of Vildagliptin Compared to Metformin in Drug Naive Patients With Type 2 Diabetes |
| 2004 | NCT00099918 | Efficacy and Safety of Vildagliptin Compared to Rosiglitazone in Drug Naive Patients With Type 2 Diabetes |
| 2004 | NCT00099944 | Efficacy and Safety of Vildagliptin in Combination With Glimepiride in Patients With Type 2 Diabetes |
| 2004 | NCT00099892 | Efficacy and Safety of Vildagliptin in Combination With Metformin in Patients With Type 2 Diabetes |
| 2004 | NCT00099853 | Efficacy and Safety of Vildagliptin in Combination With Pioglitazone in Patients With Type 2 Diabetes |
| 2004 | NCT00147836 | Evaluation of the Effects of Different Interventions on Glycemic Control in Newly-Diagnosed Type 2 Diabetic Patients |
| 2004 | NCT01542463 | Evaluation of the Use of Levemir® in Insufficiently Controlled Patients With Type 1 or Type 2 Diabetes |
| 2004 | NCT00444561 | Exploratory Study to Evaluate Various Pharmacodynamic Effects of Subcutaneously Infused or Injected Pramlintide in Obese Subjects |
| 2004 | NCT00138619 | Extension to a Study on the Efficacy and Safety of Vildagliptin Compared to Rosiglitazone in Drug Naive Patients With Type 2 Diabetes |
| 2004 | NCT00138515 | Extension to a Study on the Efficacy and Safety of Vildagliptin in Combination With Metformin in Patients With Type 2 Diabetes |
| 2004 | NCT00138554 | Extension to a Study on the Efficacy and Safety of Vildagliptin in Combination With Pioglitazone in Patients With Type 2 Diabetes |
| 2004 | NCT00138580 | Extension to a Study on the Efficacy and Safety of Vildagliptin in Combination With Glimepiride in Patients With Type 2 Diabetes |
| 2004 | NCT00545337 | Glulisine + Lantus in Type I Patients |
| 2004 | NCT00546702 | Glulisine + Lantus in Type I Patients |
| 2004 | NCT00101751 | INITIATE Plus (INITiation of Insulin to Reach A1c TargEt) Study |
| 2004 | NCT00268645 | Insulin Glargine in Type 2 Diabetes |
| 2004 | NCT00135096 | Insulin Glulisine Administered Pre-meal Versus Post-meal in Adult Subjects With Type 2 Diabetes Mellitus Receiving Insulin Glargine as Basal Insulin |
| 2004 | NCT00135057 | Insulin Glulisine in Adult Subjects With Type 2 Diabetes Receiving Insulin Glargine as Basal Insulin |
| 2004 | NCT00174668 | Insulin Glulisine in Diabetes Mellitus, Type 2 |
| 2004 | NCT00311077 | Insulin Glulisine in Healthy Lean and Obese Subjects |
| 2004 | NCT00297583 | Insulin Glulisine in Type 1 Diabetes Mellitus |
| 2004 | NCT00310297 | Insulin Glulisine in Type 2 Diabetes Mellitus |
| 2004 | NCT00206401 | Lantus in the Treatment of Type 1 Diabetes Children |
| 2004 | NCT00086515 | Metformin Add-on Study in Patients With Type 2 Diabetes Mellitus (0431-020)(COMPLETED) |
| 2004 | NCT00087516 | Monotherapy Study in Patients With Type 2 Diabetes Mellitus (0431-021) |
| 2004 | NCT00095446 | NovoLog Observation Trial in Subjects With Type 1 and Type 2 Diabetes |
| 2004 | NCT01536600 | Observational Study of Biphasic Insulin Aspart 30 Alone or in Combination With Oral Hypoglycaemic Agents in Subjects With Type 2 Diabetes |
| 2004 | NCT00659295 | Observational Study to Evaluate the Safety of Levemir® in Diabetes |
| 2004 | NCT00272012 | OPAL - Insulin Glulisine, Diabetes Mellitus |
| 2004 | NCT00174642 | Opposing Step-by-step Insulin Reinforcement to Intensified Strategy (OSIRIS) |
| 2004 | NCT01497600 | Pharmacokinetics of Insulin Detemir in Subjects With Type 2 Diabetes |
| 2004 | NCT00675740 | Physical Exercise Versus Rosiglitazone in CAD and Prediabetes |
| 2004 | NCT00086502 | Pioglitazone Add-on Study in Patients With Type 2 Diabetes Mellitus |
| 2004 | NCT00609856 | Pioglitazone vs. Insulin Glargine in the Treatment of Secondary Drug Failure in Type 2 Diabetes |
| 2004 | NCT00143520 | Placebo and Active Controlled Study of Rivoglitazone in Type 2 Diabetes |
| 2004 | NCT01536613 | Post Marketing Surveillance Study of Biphasic Insulin Aspart 30 |
| 2004 | NCT00367055 | Rosiglitazone-Metformin Combination Versus Metformin-Sulfonylurea Combination On Beta-Cell Function In Type 2 Diabetes |
| 2004 | NCT00099320 | Safety and Efficacy of Exenatide in Patients With Type 2 Diabetes Using Thiazolidinediones or Thiazolidinediones and Metformin |
| 2004 | NCT00592527 | Safety and Efficacy of Insulin Detemir in Combination With OADs in Type 2 Diabetes |
| 2004 | NCT00095082 | Safety and Efficacy of Insulin Detemir Plus Insulin Aspart Against Insulin Glargine Plus Insulin Aspart as Mealtime Insulin in Type 1 Diabetes |
| 2004 | NCT00097071 | Safety and Efficacy of NovoLog vs. Humalog in Insulin Pumps in Children and Adolescents |
| 2004 | NCT00605137 | Safety of Insulin Detemir in Children With Type 1 Diabetes |
| 2004 | NCT00494988 | Self-control Trial to Evaluate the Remission Rate in Newly Diagnosed Type 2 Diabetes Patients After Treatment With Insulin Aspart |
| 2004 | NCT00095030 | Study Comparing Muraglitazar With Glimepiride in Type 2 Diabetics Who Are Not Controlled With Metformin Alone |
| 2004 | NCT00099333 | Study of the Safety of Substituting Exenatide for Insulin in Patients Using Insulin and Oral Antidiabetic Agents |
| 2004 | NCT00513630 | Study on the Prognosis and Effect of Anti-diabetic Drugs on Type-2 Diabetes Mellitus With Coronary Artery Disease (SPREADDIMCAD) |
| 2004 | NCT00609895 | The Incidence of Hypoglycemia in Insulin Glargine-Treated Subjects With Diabetes Mellitus Upon Switching Between Bedtime and Morning Dosing |
| 2004 | NCT00081328 | Treatment Options for Type 2 Diabetes in Adolescents and Youth (TODAY) (TODAY) |
| 2004 | NCT00179127 | Use of Insulin Glargine to Treat Diabetic Ketoacidosis |
| 2004 | NCT00135083 | Variable Bolus Regimen 1-2-3 for Type 2 Diabetes Mellitus |
| 2004 | NCT00147719 | WelChol® With Metformin in Treating Patients With Type 2 Diabetes |
| 2004 | NCT01497535 | Within-subject Variability of Insulin Detemir in Healthy Volunteers |
| 2005 | NCT00318656 | 24-Hour Glycemia: Rosiglitazone Versus Glimepiride In Type 2 Diabetes |
| 2005 | NCT00539396 | A 3 Month, Randomized, Open Label, Multi-center Study of Technosphere/Insulin Compared to Insulin Aspart in Subjects With Type 1 Diabetes Mellitus Receiving Insulin Glargine |
| 2005 | NCT00539396 | A 3 Month, Randomized, Open Label, Multi-center Study of Technosphere/Insulin Compared to Insulin Aspart in Subjects With Type 1 Diabetes Mellitus Receiving Insulin Glargine |
| 2005 | NCT00240253 | A Study Evaluating the Efficacy and Safety of Adding Symlin® to Lantus® (Insulin Glargine) in Subjects With Type 2 Diabetes |
| 2005 | NCT00523913 | A Study Of BRL49653C For The Treatment Of Type 2 Diabetes |
| 2005 | NCT00266253 | A Study of GK Activator (2) in Patients With Type 2 Diabetes Mellitus Treated With a Stable Dose of Metformin |
| 2005 | NCT00349427 | A Study Of Rosiglitazone Plus Insulin To Treat Type 2 Diabetes Mellitus Patients |
| 2005 | NCT00112021 | A Study to Examine the Effect of Pramlintide on Body Weight and Its Safety and Tolerability in Obese Subjects |
| 2005 | NCT00189514 | A Study to Examine the Long Term Effect of Pramlintide on Body Weight and Its Safety and Tolerability in Obese Subjects |
| 2005 | NCT00348725 | Acceptability of a Fixed Combination of Fenofibrate and Metformin |
| 2005 | NCT00135330 | An Evaluation of Exenatide and Rosiglitazone in Subjects With Type 2 Diabetes Mellitus |
| 2005 | NCT00489190 | APIDRA Registration Study |
| 2005 | NCT00131664 | Avandia™ + Amaryl™ or Avandamet™ Compared With Metformin (AVALANCHE™ Study) (AVALANCHE) |
| 2005 | NCT00566124 | Basal Insulins - Pharmacodynamics |
| 2005 | NCT00394407 | Basal/Bolus Versus Sliding Scale Insulin In Hospitalized Patients With Type 2 Diabetes |
| 2005 | NCT00108004 | Clinical Utility and Safety of Pramlintide in Subjects With Type 1 and Type 2 Diabetes Mellitus |
| 2005 | NCT00539890 | Comparison Between Technosphere/Insulin Inhalation Powder Versus Rapid Acting Insulin in Subjects With Type 2 Diabetes Mellitus |
| 2005 | NCT00097877 | Comparison of Biphasic Insulin Aspart 70/30 Versus Insulin Glargine in Subjects With Type 2 Diabetes |
| 2005 | NCT00184574 | Comparison of Biphasic Insulin Aspart 70/30, 50/50, and 30/70 in Subjects With Type 2 Diabetes |
| 2005 | NCT00117780 | Comparison of Insulin Detemir Given Once or Twice Daily in Type 1 Diabetes |
| 2005 | NCT00104182 | Comparison of Insulin Detemir Morning, Insulin Detemir Evening and NPH Insulin Evening in Patients With Type 2 Diabetes |
| 2005 | NCT00504673 | Comparison of Insulin Detemir Versus Insulin NPH on Weight Change in Overweight and Obese With Type 2 Diabetes |
| 2005 | NCT00106366 | Comparison of Insulin Detemir With Insulin Glargine in Type 2 Diabetes |
| 2005 | NCT00184613 | Comparison of Insulin Glargine Against Insulin Aspart Infused Under the Skin in Patients With Type 2 Diabetes |
| 2005 | NCT00694122 | Comparison of Lantus and Neutral Protamine Hagedorn (NPH) Insulin in the Dawn Phenomenon |
| 2005 | NCT00264901 | Comparison of Self Adjustment Versus Standard of Care Treatment in Subjects With Type 2 Diabetes |
| 2005 | NCT00115570 | Comparison of the Ability of Glulisine With Lispro to Control Type 1 Diabetes Mellitus in Children and Adolescents |
| 2005 | NCT01514487 | Comparison of Three Liraglutide Formulations in Healthy Volunteers |
| 2005 | NCT01487811 | Comparison of Two Biphasic Insulin Aspart 30 Formulations (Current and New Formulation) in Healthy Volunteers |
| 2005 | NCT01498926 | Comparison of Two Insulin Detemir Formulations in Healthy Volunteers |
| 2005 | NCT00241423 | Effect of Exenatide on 24-Hour Blood Glucose Profile Compared With Placebo in Patients With Type 2 Diabetes |
| 2005 | NCT00177398 | Effect of Glargine Insulin on Glucose Control in Hospitalized Patients Who Receive Tube Feedings |
| 2005 | NCT00489645 | Effect of Hyperglycemia on Gastric Emptying Interactions With Pramlintide |
| 2005 | NCT01511692 | Effect of Liraglutide Compared to Glimepiride on Appetite in Subjects With Type 2 Diabetes |
| 2005 | NCT00154414 | Effect of Liraglutide on Blood Glucose Control in Japanese Subjects With Type 2 Diabetes |
| 2005 | NCT00154401 | Effect of Liraglutide on Blood Glucose Control in Subjects With Type 2 Diabetes |
| 2005 | NCT00424762 | Effect of Rosiglitazone Versus Placebo on Cardiovascular Performance and Myocardial Triglyceride |
| 2005 | NCT00184561 | Effectiveness and Safety of Biphasic Insulin Aspart 70/30 in Subjects With Type 2 Diabetes |
| 2005 | NCT00479986 | Effects of Pioglitazone in Type 2 Diabetes Mellitus and Coronary Heart Disease (PIOcard) |
| 2005 | NCT00413335 | Effects of Rosiglitazone on the Metabolic Phenotype of Impaired Glucose Tolerance in Youth |
| 2005 | NCT00274274 | Efficacy and Safety of a Fixed or a Flexible Supplementary Insulin Therapy in Type 2 Diabetes |
| 2005 | NCT00491725 | Efficacy and Safety of Repaglinide and Metformin Combination Therapy in Type 2 Diabetes Failing on Oral Anti-diabetic Drugs |
| 2005 | NCT00102388 | Efficacy and Safety of Vildagliptin Compared to Gliclazide in Drug Naive Patients With Type 2 Diabetes |
| 2005 | NCT00101803 | Efficacy and Safety of Vildagliptin in Combination With Pioglitazone in Drug Naive Patients With Type 2 Diabetes |
| 2005 | NCT01486862 | Efficacy of Biphasic Insulin Aspart 30 in Subjects With Type 2 Diabetes Failing on OADs |
| 2005 | NCT00754403 | Efficacy of Pioglitazone and Fortamet Combination Therapy in Subjects With Type 2 Diabetes |
| 2005 | NCT00770575 | Efficacy Study of Pioglitazone and Atorvastatin Combination Therapy in Treating Subjects With Elevated Risk for Cardiovascular Disease |
| 2005 | NCT00271284 | Efficacy Study on the Control of Blood Glucose Concentration in Type 1 Diabetic Patients |
| 2005 | NCT00272064 | ELEONOR STUDY: Insulin Glulisine in Type 2 Diabetes Mellitus. |
| 2005 | NCT00518427 | Evaluate Quality of Life in Type 2 Diabetes, Before and After Change to Insuline Glargine |
| 2005 | NCT00138567 | Extension to a Study on the Efficacy and Safety of Vildagliptin Compared to Metformin in Drug Naive Patients With Type 2 Diabetes |
| 2005 | NCT00259896 | In-patient Study in Patients With Type 2 Diabetes Mellitus |
| 2005 | NCT00927524 | Insulin Exposure and Glucose Response to Meals in Type 1 Diabetic Subjects Administered Two Different Insulin Regimens Compared to the Endogenous Insulin Exposure and Glucose Response to Meals In Healthy Adult Controls |
| 2005 | NCT00258804 | Insulin Glargine During and After the Period of Fasting in Ramadan |
| 2005 | NCT00272077 | Insulin Glargine in Type 2 Diabetes Mellitus |
| 2005 | NCT00135941 | Insulin Glargine Plus Insulin Glulisine Multiple Daily Injections (MDI) Versus Premix Insulin Treatment in Subjects With Diabetes Mellitus (Type 1 or Type 2) |
| 2005 | NCT00397553 | Insulin Glulisine, Diabetes Mellitus Type 1 |
| 2005 | NCT00091949 | Insulin Resistance Intervention After Stroke Trial (IRIS) |
| 2005 | NCT00151697 | LANN-study: Lantus, Amaryl, Novorapid, Novomix Study |
| 2005 | NCT00335465 | Lantus Effect on Myocardial Glucose Metabolism in T2 |
| 2005 | NCT00576784 | Metabolic Effects of Pioglitazone in Type II Diabetic Patients Previously Treated With Insulin (PIOswitch) |
| 2005 | NCT00373178 | Metabolic Effects of Treatment in Patients With Recently Diagnosed Type 2 Diabetes |
| 2005 | NCT01087866 | Metformin Versus Insulin in the Treatment of Gestational Diabetes Mellitus |
| 2005 | NCT00103857 | MK0431 (Sitagliptin) and Metformin Co-Administration Factorial Study in Patients With Type 2 Diabetes Mellitus (0431-036) |
| 2005 | NCT01043965 | Myocardial Perfusion in Type 2 Diabetes |
| 2005 | NCT00309465 | Perioperative Insulin Glargine Dosing Study |
| 2005 | NCT01498939 | Pharmacokinetics of Insulin Detemir in Healthy Chinese Male Subjects |
| 2005 | NCT01497587 | Pharmacokinetics of Insulin Detemir in Healthy Volunteers From Taiwan |
| 2005 | NCT01396564 | Pioglitazone and Metformin in Diabetic Children |
| 2005 | NCT00306176 | Rosiglitazone and Exercise in Patients With Type 2 Diabetes Mellitus |
| 2005 | NCT00116831 | Rosiglitazone Versus a Sulfonylurea On Progression Of Atherosclerosis In Patients With Heart Disease And Type 2 Diabetes |
| 2005 | NCT00755846 | Safety and Efficacy Study of Alogliptin on Glycemic Control in Subjects With Type 2 Diabetes. |
| 2005 | NCT00110851 | Safety and Efficacy Study of PN2034 in Type 2 Diabetes Patients on Concomitant Rosiglitazone and Metformin (or Avandamet) |
| 2005 | NCT01508806 | Safety and Tolerability of Liraglutide in Subjects With Impaired Kidney Function and in Subjects With Normal Kidney Function |
| 2005 | NCT00308737 | Safety of Inhaled Insulin With Type 1 and Type 2 Diabetes |
| 2005 | NCT01709929 | Safety of Insulin Detemir for the Treatment of Insulin Dependent Type 1 or Type 2 Diabetes Mellitus |
| 2005 | NCT02183350 | Safety, Tolerability, Pharmacokinetics and Pharmacodynamics of BI 1356 BS in Patients With Type 2 Diabetes |
| 2005 | NCT02183415 | Safety, Tolerability, Pharmacokinetics and Pharmacodynamics of BI 1356 BS as Tablet in Patients With Type 2 Diabetes |
| 2005 | NCT01865279 | Safety, Tolerability, Pharmacokinetics and Pharmacodynamics of Explorative Formulation of Insulin Degludec |
| 2005 | NCT00121641 | Saxagliptin Treatment in Subjects With Type 2 Diabetes Who Are Not Controlled With Diet and Exercise |
| 2005 | NCT00506194 | Short-Term Intensive Insulin Therapy Induction of Long-term Glycemic Control |
| 2005 | NCT00121667 | Study Assessing Saxagliptin Treatment In Type 2 Diabetic Subjects Who Are Not Controlled With Metformin Alone |
| 2005 | NCT00103935 | Study Examining Exenatide Long-Acting Release in Subjects With Type 2 Diabetes |
| 2005 | NCT00196989 | Study In People With Type 2 Diabetes |
| 2005 | NCT00106808 | Study of Muraglitazar Versus Pioglitazone in Type 2 Diabetes |
| 2005 | NCT00107107 | Study of the Long-Term Safety of Pramlintide in Subjects With Type 1 Diabetes Mellitus |
| 2005 | NCT00920725 | Subcutaneous Aspart Insulin to Treat Diabetic Ketoacidosis (DKA) and Beta-Hydroxybutyrate Testing in DKA |
| 2005 | NCT00106704 | Sulfonylurea Add-on Study in Patients With Type 2 Diabetes Mellitus (0431-035) |
| 2005 | NCT01490112 | Surveillance Study of NovoRapid® for New Drug Re-examination |
| 2005 | NCT00279201 | The DURABLE Trial: Evaluating the Durability of Starter Insulin Regimens in Patients With Type 2 Diabetes (IOOV) |
| 2005 | NCT00206297 | The Effect of Prolonged Pramlintide Infusion in Pediatric Diabetes |
| 2005 | NCT00254800 | The Effects of Exenatide on Oral Contraceptive Pharmacokinetics in Healthy Females |
| 2005 | NCT00206258 | The Role of Amylin and Glucagon in T1DM |
| 2005 | NCT00102466 | Vildagliptin Compared to Gliclazide in Combination With Metformin in Patients With Type 2 Diabetes |
| 2005 | NCT00106340 | Vildagliptin Compared to Glimepiride in Combination With Metformin in Patients With Type 2 Diabetes |
| 2005 | NCT00237237 | Vildagliptin Compared to Pioglitazone in Combination With Metformin in Patients With Type 2 Diabetes |
| 2005 | NCT01497574 | Within-subject Variability of Insulin Detemir in Children and Adolescents With Type 1 Diabetes |
| 2006 | NCT00402012 | "TAKE TIME" Pioglitazone Reverses Defects in Mitochondrial Biogenesis in Patients With T2DM |
| 2006 | NCT00367445 | A Clinical Trial Comparing Short-Term Efficacy and Safety of Exubera and Lantus |
| 2006 | NCT00391027 | A Clinical Trial Comparing the Efficacy and Safety of Exubera® and Lantus® |
| 2006 | NCT00457093 | A Comparison Between Glargine and Detemir Insulin in Type 2 Diabetes |
| 2006 | NCT00283218 | A Comparison of Pharmacodynamics and Pharmacokinetics of Insulin Aspart, Biphasic Insulin Aspart 30, 50 and 70. |
| 2006 | NCT00388986 | A Drug-Drug Interaction Study of GK Activator (2) and Glyburide in Patients With Type 2 Diabetes. |
| 2006 | NCT00327015 | A Phase 3 Study of BMS-477118 in Combination With Metformin in Subjects With Type 2 Diabetes Who Are Not Controlled With Diet and Exercise |
| 2006 | NCT00374907 | A Study Assessing Saxagliptin Treatment in Subjects With Type 2 Diabetes Who Are Not Controlled With Diet and Exercise |
| 2006 | NCT00295633 | A Study Assessing Saxagliptin Treatment in Type 2 Diabetic Subjects Who Are Not Controlled With TZD Therapy Alone |
| 2006 | NCT00360334 | A Study Comparing Exenatide With Basal Insulin in Achieving a Target HbA1c With Minimum Weight Gain in Type 2 Diabetes Patients |
| 2006 | NCT01000922 | A Study Comparing the Pharmacodynamic Properties of Insulin VIAJECT, Regular Human Insulin, and Insulin Lispro |
| 2006 | NCT00831129 | A Study for Pre-diabetic Patients With Cholesterol Lowering Drugs (SIROCO) |
| 2006 | NCT00388518 | A Study of Aleglitazar in Patients With Type 2 Diabetes |
| 2006 | NCT00432679 | A Study Of BRL49653C For The Treatment Of Type 2 Diabetes (Combination Therapy With Sulfonyl Urea) -With Placebo Study |
| 2006 | NCT00313313 | A Study of Saxagliptin in Subjects With Type 2 Diabetes Who Have Inadequate Blood Sugar Control With Sulfonylureas |
| 2006 | NCT00382239 | A Study to Assess the Effect on Glucose Control and Safety and Tolerability of LY2148568 In Japanese Patients With Type 2 Diabetes |
| 2006 | NCT02004886 | A Study to Assess the Safety, Tolerability and Glucose-Lowering Efficacy of MK-0893 in Participants With Type 2 Diabetes Mellitus (MK-0893-005) |
| 2006 | NCT01021891 | A Study to Evaluate Insulin in the Blood After Inhalation of a Dry Powder Insulin Formulation (Called Technosphere®/Insulin) in Non-diabetic Patients With & Without Chronic Obstructive Pulmonary Disease (COPD) |
| 2006 | NCT00313183 | A Study to Evaluate Symlin in Adolescent Subjects With Type 1 Diabetes Mellitus |
| 2006 | NCT00392925 | A Study to Evaluate the Effect on Body Weight of Leptin Administered in Conjunction With Pramlintide in Overweight and Obese Subjects |
| 2006 | NCT00402077 | A Study to Examine the Safety, Tolerability, and Body Weight Effect of Pramlintide Alone and in Combination With Oral Antiobesity Agents in Overweight and Obese Subjects |
| 2006 | NCT00386100 | A Type 2 Diabetes Study of the Longer-Term Glycemic Effect of AVANDAMET vs. Metformin |
| 2006 | NCT01542424 | An Observational Study in Patients Using NovoMix® 30 or Levemir® for Treatment of Type 1 or Type 2 Diabetes Mellitus |
| 2006 | NCT00353990 | Bioavailability of Insulin Administered in Duodenum |
| 2006 | NCT01530048 | Bioequivalence of Two Insulin Aspart Formulations (100 U/mL Versus 200 U/mL) |
| 2006 | NCT00297063 | BRL49653C In Type 2 Diabetes -Comparison Study With Pioglitazone And Placebo By Monotherapy- |
| 2006 | NCT01865292 | Comparing the Pharmacodynamics and Pharmacokinetics of Explorative Formulation of Insulin Degludec With Insulin Glargine in Subjects With Type 1 and Type 2 Diabetes |
| 2006 | NCT00359879 | Comparison of Exenatide Taken Before Lunch and Dinner With Before Breakfast and Dinner in Patients With Type 2 Diabetes |
| 2006 | NCT01865305 | Comparison of Explorative Formulation of Insulin Degludec and Insulin Aspart Co-formulation Versus Explorative Formulation of Insulin Degludec and Insulin Aspart Separately Compared With Biphasic Insulin Aspart 30 in Male Subjects With Diabetes |
| 2006 | NCT01490099 | Comparison of Insulin Detemir Produced by the Current Process and the NN729 Process in Healthy Subjects |
| 2006 | NCT01536028 | Comparison of the Pharmacodynamics and Pharmacokinetics of Biphasic Insulin Aspart 30, 50, 70 and Insulin Aspart in Subjects With Type 1 Diabetes |
| 2006 | NCT00377858 | Comparison of Two Approaches to Insulin Therapy in Patients With Type 2 Diabetes (IOOX) |
| 2006 | NCT01515579 | Comparison of Two Liraglutide Formulations in Healthy Subjects |
| 2006 | NCT00803920 | Continuous Glucose Monitoring (CGM) in Subjects With Type 2 Diabetes Taking Twice-Daily Exenatide or Once-Weekly Exenatide |
| 2006 | NCT00291772 | Continuous Subcutaneous Infusion of Pramlintide and Insulin |
| 2006 | NCT00363519 | Controlled Study of MK-0431/ONO-5435 in Patients With Type 2 Diabetes Mellitus |
| 2006 | NCT00363844 | Controlled Study of MK-0431/ONO-5435 in Patients With Type 2 Diabetes Mellitus |
| 2006 | NCT00363948 | Controlled Study of MK-0431/ONO-5435 in Patients With Type 2 Diabetes Mellitus |
| 2006 | NCT00299871 | Dose Ranging Study of the GLP-1 Agonist AVE0010 in Metformin-Treated Subjects With Type 2 Diabetes Mellitus |
| 2006 | NCT00461617 | Double-Blind Comparison Between Mitiglinide and Nateglinide in Type 2 Diabetic Patients |
| 2006 | NCT00376038 | Drug Interactions From Simultaneous Administration Of Metformin And GSK189075 To Subjects With Type 2 Diabetes |
| 2006 | NCT00282451 | Effect of Biphasic Insulin Compared to Biphasic Insulin Combined With Insulin Aspart, With or Without Metformin in Type 2 Diabetes |
| 2006 | NCT01037842 | Effect of Combination of Mitiglinide and Metformin on Glycemic Control in Patients With Type 2 Diabetes Mellitus |
| 2006 | NCT00383877 | Effect of Insulin Detemir on Blood Glucose Control in Subjects With Type 2 Diabetes |
| 2006 | NCT00395746 | Effect of Liraglutide in Combination With Sulfonylurea (SU) on Blood Glucose Control in Subjects With Type 2 Diabetes |
| 2006 | NCT01517555 | Effect of Liraglutide on Absorption of Paracetamol in Subjects With Type 2 Diabetes |
| 2006 | NCT00318422 | Effect of Liraglutide on Blood Glucose Control in Subjects With Type 2 Diabetes (LEAD-1) |
| 2006 | NCT00331851 | Effect of Liraglutide on Blood Glucose Control in Subjects With Type 2 Diabetes (LEAD-5) |
| 2006 | NCT00333151 | Effect of Liraglutide on Blood Glucose Control in Subjects With Type 2 Diabetes |
| 2006 | NCT00393718 | Effect of Liraglutide on Blood Glucose Control in Subjects With Type 2 Diabetes |
| 2006 | NCT01518166 | Effect of Liraglutide on Gastrointestinal Absorption of Several Drugs and Potential Influence of Liraglutide on Intragastric pH |
| 2006 | NCT00399711 | Effect of Repaglinide and Metformin Combination Tablet or Rosiglitazone and Metformin in Fixed Dose Combination on Blood Glucose Control in Patients With Type 2 Diabetes |
| 2006 | NCT00375492 | Effect on Weight Loss of Exenatide Versus Placebo |
| 2006 | NCT00313001 | Effects of Biphasic Insulin Aspart 70/30 vs. Exenatide in Type 2 Diabetes Patients Not Reaching Blood Glucose Targets on Metformin and a Sulfonylurea. |
| 2006 | NCT00308139 | Effects of Exenatide Long-Acting Release on Glucose Control and Safety in Subjects With Type 2 Diabetes Mellitus(DURATION - 1) |
| 2006 | NCT00486187 | Effects of ROSIglitazone on Inflammatory Markers and Adipokines in Diabetic Patients Using an Angiotensin Receptor Blocker (TELmisartan) - The ROSITEL Study |
| 2006 | NCT00324675 | Effects of Rosiglitazone on Renal Hemodynamics and Proteinuria of Type 2 Diabetic Patients With Renal Insufficiency Due to Overt Diabetic Nephropathy |
| 2006 | NCT00308308 | Efficacy & Safety of Inhaled Insulin in Type 1 Diabetes |
| 2006 | NCT00309244 | Efficacy and Safety in Subjects With Type 2 Diabetes Receiving Subcutaneous Basal Insulin and Prandial Inhalation of Technosphere/Insulin Versus Subcutaneous Premixed Insulin Therapy Over a 52-Week Treatment Period and a 4-Week Follow-up |
| 2006 | NCT00309244 | Efficacy and Safety in Subjects With Type 2 Diabetes Receiving Subcutaneous Basal Insulin and Prandial Inhalation of Technosphere/Insulin Versus Subcutaneous Premixed Insulin Therapy Over a 52-Week Treatment Period and a 4-Week Follow-up |
| 2006 | NCT00328172 | Efficacy and Safety of 3 Doses of BI1356 (Linagliptin) in Type 2 Diabetes Patients |
| 2006 | NCT00286442 | Efficacy and Safety of Alogliptin Combined With Metformin in Participants With Type 2 Diabetes Mellitus |
| 2006 | NCT00328627 | Efficacy and Safety of Alogliptin Combined With Pioglitazone in Treating Subjects With Type 2 Diabetes Mellitus. |
| 2006 | NCT00286455 | Efficacy and Safety of Alogliptin in Subjects With Type 2 Diabetes |
| 2006 | NCT00309608 | Efficacy and Safety of BI 1356 BS (Linagliptin) in Combination With Metformin in Patients With type2 Diabetes |
| 2006 | NCT01548248 | Efficacy and Safety of Levemir® Used as Basal Insulin |
| 2006 | NCT00318786 | Efficacy and Safety of Three Times a Day BIAsp-70 Compared to Two Times a Day BIAsp-30 in Subjects With Type 2 Diabetes |
| 2006 | NCT00383578 | Efficacy and Safety of Vildagliptin Compared to Metformin in Elderly Drug Naive Patients With Type 2 Diabetes |
| 2006 | NCT00286429 | Efficacy and Safety Study of Alogliptin and Insulin in the Treatment of Type 2 Diabetes. |
| 2006 | NCT00610038 | Efficacy and Safety Study of Sulfonylureas in Neonatal Diabetes Mellitus (GLIDKIR6-2) |
| 2006 | NCT00395512 | Efficacy of Alogliptin With Pioglitazone (Actos®) in Subjects With Type 2 Diabetes Mellitus |
| 2006 | NCT00382096 | Efficacy of Fixed Combination Therapy of Vildagliptin and Metformin Compared to the Individual Monotherapy Components in Drug Naive Patients With Type 2 Diabetes |
| 2006 | NCT00770952 | Efficacy of Pioglitazone and Glimepiride Combination Therapy in Treating Subjects With Type 2 Diabetes Mellitus. |
| 2006 | NCT00771004 | Efficacy of Pioglitazone on Myocardial Function in Patients Undergoing Coronary Stent Implantation. |
| 2006 | NCT00396357 | Efficacy/Safety of Vildagliptin and Metformin Combination Therapy in Patients With Type 2 Diabetes Not Well Controlled With Metformin Alone |
| 2006 | NCT01577095 | Evaluating the Effects of Electroacupuncture and Rosiglitazone Combined Therapy |
| 2006 | NCT00290940 | Evaluation of Glucose Lowering Effect, Safety and Tolerability of CS-917 |
| 2006 | NCT00359762 | Exenatide Versus Glimepiride in Patients With Type 2 Diabetes |
| 2006 | NCT00348374 | Exubera vs Lispro in a Lantus-based Regimen for Improved Glycemic Control in Type 2 Diabetes |
| 2006 | NCT00354536 | In-patient Study With GSK716155 In Patients With Type 2 Diabetes Mellitus |
| 2006 | NCT01508858 | Influence on the Effect of an Oral Contraceptive Drug After Administration of Liraglutide in Postmenopausal Women |
| 2006 | NCT00397631 | Initial Combination With Pioglitazone Study (0431-064) |
| 2006 | NCT00590226 | Insulin Detemir Versus NPH Insulin In Hospitalized Patients With Diabetes |
| 2006 | NCT00384085 | Insulin Glargine "All to Target" Trial |
| 2006 | NCT00347100 | Insulin Glargine in Type 2 Diabetic Patients (TARGET) |
| 2006 | NCT00360698 | Insulin Glulisine in Type 2 Diabetic Patients (Basal Plus) |
| 2006 | NCT01538511 | Insulin Profile of Biphasic Insulin Aspart 70 to That of Biphasic Insulin Aspart 30 in Healthy Volunteers |
| 2006 | NCT01865318 | Investigation of Pharmacodynamic Characteristics of Explorative Formulation of Insulin Degludec in Male Subjects With Type 1 Diabetes |
| 2006 | NCT00322075 | LANCGMS - Lantus Continuous Glucose Monitoring Subcutaneous |
| 2006 | NCT00405418 | Lantus Versus Levemir Treat-To-Target |
| 2006 | NCT00423215 | LAPAS Study: Insulin Glargine in Type 2 Diabetes Mellitus |
| 2006 | NCT00393705 | Lispro Mid Mixture (MM) Intensive Mixture Therapy With Progressive Dose-Titration of Lispro Low Mixture (LM) or Biphasic Insulin Aspart 30/70 (S019) |
| 2006 | NCT00306384 | Long-term Safety of Alogliptin in Patients With Type 2 Diabetes Mellitus |
| 2006 | NCT00922194 | Metformin in Overweight Type 2 Diabetes Mellitus |
| 2006 | NCT01240785 | Metformin Versus Insulin in Gestational Diabetes |
| 2006 | NCT00372060 | MK0431 (Sitagliptin) Pioglitazone Add-on Study for Patients With Type 2 Diabetes Mellitus (0431-055)(COMPLETED) |
| 2006 | NCT00289848 | MK0431 Monotherapy Study in Patients With Type 2 Diabetes Mellitus (0431-040) |
| 2006 | NCT01588470 | Myocardial Dysfunction in Type 2 Diabetes Mellitus (T2DM) |
| 2006 | NCT01548235 | Observational Safety Study in Subjects With Type 2 Diabetes Mellitus Starting or Switching to Biphasic Insulin Aspart 30 Treatment |
| 2006 | NCT00659282 | Observational Study of Safety and Effectiveness of NovoMix® 30 for the Treatment of Diabetes |
| 2006 | NCT01486875 | Observational Study of Safety of NovoMix® 30 Treatment for Type 2 Diabetes |
| 2006 | NCT01542489 | Observational Study of the Predictability of Levemir® in Terms of Metabolic Control, Change of Body Weight and Hypos |
| 2006 | NCT01545791 | Observational Study to Evaluate the Safety of Levemir® in Patients With Diabetes |
| 2006 | NCT00437554 | Phase III Study for Glimepiride + Metformin Hydrochloride (Amaryl M) Slow Release (SR) |
| 2006 | NCT01536639 | Physiological Concept of Insulin Therapy in Subjects With Type 2 Diabetes |
| 2006 | NCT01536652 | Prandial Orientated Biphasic Insulin Aspart 30 Therapy - the Physiological Premix Insulin Therapy for Type 2 Diabetes |
| 2006 | NCT01574820 | Role of Rosiglitazone on Pre-Diabetes Mellitus and Coronary Artery Disease |
| 2006 | NCT00381342 | Safety and Efficacy of Exenatide as Monotherapy |
| 2006 | NCT00324363 | Safety and Efficacy of Exenatide in Patients With Type 2 Diabetes Using Metformin or Sulfonylureas and Metformin |
| 2006 | NCT00402909 | Safety and Efficacy of Nateglinide in Patients With Type 2 Diabetes Already Taking Insulin Glargine, Metformin and/or Pioglitazone or Rosiglitazone |
| 2006 | NCT00396227 | Safety and Efficacy of Vildagliptin vs. Thiazolidinedione as add-on Therapy to Metformin in Patients With Type 2 Diabetes Not Controlled With Metformin Alone |
| 2006 | NCT01515592 | Safety and Tolerability of Liraglutide in Healthy Japanese Male Volunteers |
| 2006 | NCT01507389 | Safety of Liraglutide in Subjects With Liver Impairment and in Subjects With Normal Liver Function |
| 2006 | NCT01865331 | Safety, Tolerability and Pharmacokinetic and Pharmacodynamic Characteristics of Explorative Formulations of Insulin Degludec and IDegAsp 50 in Healthy Japanese Subjects |
| 2006 | NCT00541775 | Safety/Efficacy of Sitagliptin in Patient w/ Type 2 Diabetes (0431-801) |
| 2006 | NCT00395343 | Sitagliptin Added-on to Insulin Study (0431-051) |
| 2006 | NCT00337610 | Sitagliptin Metformin Add-on Study in Patients With Type 2 Diabetes Mellitus |
| 2006 | NCT00350779 | Sitagliptin Metformin/PPARg Agonist Combination Therapy Add-on (0431-052) |
| 2006 | NCT00357370 | Sitagliptin Metformin/PPARg Agonist Combination Therapy Add-on (0431-052) |
| 2006 | NCT00269061 | Study In Patients With Type 2 Diabetes Who Are Taking Metformin And Sulfonylurea, Metformin And Insulin, Or Insulin |
| 2006 | NCT00286494 | Study of Alogliptin Combined With Pioglitazone in Subjects With Type 2 Diabetes Mellitus |
| 2006 | NCT00286468 | Study of Alogliptin Combined With Sulfonylurea in Subjects With Type 2 Diabetes Mellitus. |
| 2006 | NCT00316082 | Study of BMS-477118 as Monotherapy With Titration in Subjects With Type 2 Diabetes Who Are Not Controlled With Diet and Exercise |
| 2006 | NCT00305604 | Study of Sitagliptin in Older Type 2 Diabetics (0431-047)(COMPLETED) |
| 2006 | NCT01536626 | Switch From Premixed Human Insulin to Biphasic Insulin Aspart in the Netherlands |
| 2006 | NCT00353834 | The Effect of Exenatide Compared to Lantus Insulin on Vascular Function in Type 2 Diabetes |
| 2006 | NCT00313742 | The Effect of Exercise on Blood Glucose Levels in Patients With Type 1 Diabetes: A Comparison of 3 Long-acting Insulins |
| 2006 | NCT00521690 | The Effect of Insulin Detemir on Blood Glucose Control in Taiwanese Patients With Type 2 Diabetes Failing on OAD |
| 2006 | NCT01542476 | The Impact of Initiating/Switching to Insulin Detemir on Emotional Well-being and Treatment Satisfaction |
| 2006 | NCT00318461 | To Compare the Effect of Liraglutide When Given Together With Metformin With the Effect of Metformin Given Alone and With the Effect of Glimepiride and Metformin Given Together (LEAD-2) |
| 2006 | NCT00541437 | Type 2 Diabetes Patients Switched From Sulfonylurea With Metformin to Glyburide/Metformin Combination Tablet |
| 2007 | NCT01028391 | 30-Week Extension to an Initial Combination Study (24 Weeks in Duration) of Sitagliptin With Pioglitazone (0431-064) |
| 2007 | NCT00575588 | 52-week add-on to Metformin Comparison of Saxagliptin and Sulphonylurea, With a 52-week Extension Period |
| 2007 | NCT00741429 | A 2-Month Safety Follow-Up Trial |
| 2007 | NCT00461058 | A Comparative Study of Aleglitazar and Actos in Patients With Type 2 Diabetes Mellitus and New York Heart Association (NYHA) Class II Heart Failure. |
| 2007 | NCT00461006 | A Comparison of the Effects of Aleglitazar and Actos on Renal Function on Patients With Type 2 Diabetes. |
| 2007 | NCT00528879 | A Phase III Study of BMS-512148 (Dapagliflozin) in Patients With Type 2 Diabetes Who Are Not Well Controlled on Metformin Alone |
| 2007 | NCT00502138 | A Pilot Study of Continuous Subcutaneous Pramlintide Infusion Therapy in Patients With Type 1 Diabetes |
| 2007 | NCT00500370 | A Pilot Study of Effects of Exenatide on Body Weight in Non-Diabetic, Obese Patients |
| 2007 | NCT00525330 | A Randomized, Double-Blind, Placebo-Controlled Study to Assess the Safety and Efficacy of KRP-104 in Patients With Type 2 Diabetes Inadequately Controlled on Metformin Alone |
| 2007 | NCT00570687 | A Study Comparing Subcutaneous Rapid Acting Insulin and One Formulation of Inhaled Insulin in Subjects With Type 2 Diabetes |
| 2007 | NCT00447213 | A Study for Patients With Type 1 Diabetes Mellitus |
| 2007 | NCT00548808 | A Study for Type 2 Diabetic Patients |
| 2007 | NCT00411554 | A Study of Sitagliptin in Patients With Type 2 Diabetes Mellitus Who Have Inadequate Glycemic Control on Diet/Exercise Therapy (0431-054)(COMPLETED) |
| 2007 | NCT00516074 | A Study to Assess the Effect of Exenatide Treatment on Mean 24-Hour Heart Rate in Patients With Type 2 Diabetes |
| 2007 | NCT00519480 | A Study To Assess The Safety And Tolerability Of GSK189075 When Given With A Total Daily Dose Of >/ 2000mg of Metformin |
| 2007 | NCT00467649 | A Study to Characterize Regimens of Basal Insulin Intensified With Either Symlin® or Rapid Acting Insulin in Patients With Type 2 Diabetes |
| 2007 | NCT00477581 | A Study to Compare the Effects of Exenatide and Sitagliptin on Postprandial Glucose in Subjects With Type 2 Diabetes Mellitus |
| 2007 | NCT00612794 | A Study to Examine Safety, Tolerability, Pharmacokinetics and Pharmacodynamics of Exenatide Once Weekly in Japanese Patients With Type 2 Diabetes |
| 2007 | NCT00468039 | A Sub-study to LMF237A2302 to Assess the Effect of 24 Weeks Treatment With Initial Combination of Vildagliptin Plus Metformin |
| 2007 | NCT00490178 | Acceptability Study of a New Fixed Combination of Fenofibrate 80 mg BID and Metformin 1000 mg BID in Type 2 Diabetes and Dyslipidemia |
| 2007 | NCT00545584 | Addition Of Januvia (Sitagliptin) Improves Glycemic Control In Patients Inadequately Controlled By Metformin (MK0431-078) |
| 2007 | NCT00516048 | An Exploratory Study of the Effect of Treatment Interruption on Safety of Exenatide in Patients With Type 2 Diabetes |
| 2007 | NCT00696995 | An Observational Study of Type 2 Diabetes in Patients Starting on NovoMix® 30 Treatment |
| 2007 | NCT00722631 | Anti-Inflammatory Effects of Pioglitazone |
| 2007 | NCT00596687 | Basal Bolus Insulin Versus SSRI in Type 2 Diabetes Undergoing General Surgery |
| 2007 | NCT00590044 | Basal Insulin in the Management of Patients With Diabetic Ketoacidosis (DKA) |
| 2007 | NCT00641407 | Bedtime Insulins and Oral Antihyperglycemic Drugs in Type 2 Diabetes |
| 2007 | NCT02183324 | BI 1356 BS in Japanese Patients With Type 2 Diabetes Mellitus |
| 2007 | NCT01515553 | Bioequivalence of Two Liraglutide Formulations in Healthy Volunteers |
| 2007 | NCT00449839 | Changes of the Infusion Rate in Insulin Pump Treatment |
| 2007 | NCT00574912 | Characteristics of Glargine in Type 2 Diabetics |
| 2007 | NCT00708981 | Combined Diabetes-Renal Multifactorial Intervention In Patients With Advanced Diabetic Nephropathy (ADN) |
| 2007 | NCT00542399 | Comparing the Metabolic Control of Once to Twice-daily Insulin Detemir Injections |
| 2007 | NCT00528918 | Comparison of Apidra to Regular Insulin in Hospitalized Patients |
| 2007 | NCT00469092 | Comparison of Biphasic Insulin Aspart 30 Versus Insulin Glargine Both in Combination With Metformin and Glimepiride in Subjects With Type 2 Diabetes |
| 2007 | NCT00542620 | Comparison of Insulin Detemir and Insulin Aspart in 2 Separate Injections Twice Daily to Extemporaneous Mixing Injection Regimen Twice Daily - The Paediatric Mixing Trial |
| 2007 | NCT01513525 | Comparison of Liraglutide Injected at Three Different Injection Sites in Healthy Volunteers |
| 2007 | NCT00435019 | Comparison of NPH Insulin and Insulin Detemir in Children and Adolescents With Type 1 Diabetes |
| 2007 | NCT00824668 | Comparison of Pharmacodynamics and Pharmacokinetics of Biphasic Insulin Aspart 30 and Insulin Glargine and Insulin Glulisine Therapy in Subjects With Type 2 Diabetes |
| 2007 | NCT00537303 | Comparison of the Blood Sugar Lowering Effect and Safety of Two Insulin Treatments in Type 2 Diabetes |
| 2007 | NCT00487240 | Comparison of Two Basal Insulin Therapies for Patients With Type 1 Diabetes |
| 2007 | NCT00494013 | Comparison of Two Basal Insulins for Patients With Type 2 Diabetes (IOOY) |
| 2007 | NCT00510952 | Comparison of Two Basal Insulins for Patients With Type 2 Diabetes on Anti-Hyperglycemic Medications (IOPE) |
| 2007 | NCT00560417 | Comparison of Two Basal Insulins for Patients With Type 2 Diabetes Taking Oral Diabetes Medicines and Exenatide |
| 2007 | NCT00564395 | Detemir: Role in Type 1 Diabetes |
| 2007 | NCT00488527 | DOMME Dose Optimization Multicentric Mexican Evaluation |
| 2007 | NCT00500331 | Dose-Ranging Study in Treatment Naive Type 2 Diabetes Mellitus(T2DM) |
| 2007 | NCT00998335 | Effect of a Basal/Pre-Meal Insulin Strategy (Detemir/Aspart) on Insulin Secretion and Action in Type 2 Diabetes |
| 2007 | NCT00669864 | Effect of Biphasic Insulin Aspart 30 Combined With Metformin on Blood Glucose Control in Subjects With Type 2 Diabetes Inadequately Controlled With Basal Insulin |
| 2007 | NCT00434954 | Effect of Exenatide Plus Metformin vs. Insulin Aspart Plus Metformin on Glycemic Control and Hypoglycemia in Patients With Type 2 Diabetes |
| 2007 | NCT00425490 | Effect of Januvia on Beta Cell Function in Patients With Diabetes Mellitus |
| 2007 | NCT00518882 | Effect of Liraglutide or Exenatide Added to an Ongoing Treatment on Blood Glucose Control in Subjects With Type 2 Diabetes |
| 2007 | NCT00845182 | Effect of Pioglitazone and Exenatide on Body Weight and Beta Cell Function (PIO-EX) |
| 2007 | NCT00417729 | Effects of Acarbose Versus Glibenclamide on MAGE and Oxidative Stress in Patients With Type 2 DM |
| 2007 | NCT00484419 | Effects of Colesevelam HCl, Rosiglitazone, Sitagliptin on Control of Blood Glucose and Lipids in Type 2 Diabetes Patients Whose Blood Glucose Isn't Completely Controlled With Metformin |
| 2007 | NCT00771693 | Effects of Insulin Treatment on Postprandial Platelet Activation in Patients With Non-insulin-dependent Diabetes Mellitus (NIDDM) |
| 2007 | NCT00570739 | Effects of Metformin Hydrochloride (HCl) in Combination With Colesevelam HCl, Compared to Metformin HCl Alone, in Patients With Type 2 Diabetes Mellitus and the Effects of Colesevelam HCl on Lipids and Glucose on Pre-diabetic Patients. |
| 2007 | NCT00642681 | Effects of URI on Diabetic Subjects Utilizing Technosphere Insulin After a Meal Challenge |
| 2007 | NCT01263470 | Efficacy and Safety of Alogliptin in Participants With Type 2 Diabetes in Japan |
| 2007 | NCT01318070 | Efficacy and Safety of Alogliptin Used Combination With Thiazolidine in Participants With Type 2 Diabetes in Japan |
| 2007 | NCT01263483 | Efficacy and Safety of Alogliptin Used in Combination With Î±-glucosidase Inhibitor in Participants With Type 2 Diabetes in Japan |
| 2007 | NCT00537277 | Efficacy and Safety of Biphasic Insulin Aspart 30 in Type 2 Diabetes Mellitus When Failing on OADs |
| 2007 | NCT00474045 | Efficacy and Safety of Insulin Detemir Versus Neutral Protamine Hagedorn (NPH) Insulin in Pregnant Women With Type 1 Diabetes |
| 2007 | NCT00727857 | Efficacy and Safety of Pioglitazone and Metformin Combination Therapy in Treating Type 2 Diabetes Mellitus. |
| 2007 | NCT00772174 | Efficacy and Safety Study of Pioglitazone Combined With Metformin on Metabolic Syndrome in Subjects With Type 2 Diabetes (PRISMA) |
| 2007 | NCT00432276 | Efficacy of Alogliptin and Pioglitazone in Subjects With Type 2 Diabetes Mellitus |
| 2007 | NCT00655863 | Efficacy of Alogliptin and With Pioglitazone in Patients With Type 2 Diabetes. |
| 2007 | NCT00770653 | Efficacy of Pioglitazone/Metformin Combination Therapy in Subjects With Type 2 Diabetes Mellitus and Dyslipidemia. |
| 2007 | NCT00505882 | Efficacy of Pramlintide on Prevention of Weight Gain Early Onset of Type 1 Diabetes |
| 2007 | NCT01429818 | Endothelial Disfunction Treatment With Glimepiride/Metformin Combination (Glimetal) in Type 2 Diabetes Patients |
| 2007 | NCT00437112 | Evaluate the Efficacy and Safety of Insulin Compared to Glargine in Patients With Type 2 Diabetes |
| 2007 | NCT00655044 | Evaluation of Levemir® for the Treatment of Type 1 and 2 Diabetes |
| 2007 | NCT00652288 | Evaluation of Pharmacokinetics and Pharmacodynamic Properties of Rapid-Acting Insulin Analogs |
| 2007 | NCT00455858 | Evaluation of the Glycaemic Control With Insulin Detemir as an add-on to Current Oral Anti-diabetic Drug Treatment in Subjects With Type 2 Diabetes in Korea |
| 2007 | NCT00969592 | Expanded PK and PD of Insulin Glulisine Versus Insulin Aspart in Healthy Volunteers |
| 2007 | NCT00553488 | Feasibility Study of the Effect of Intra-Dermal Insulin Injection on Blood Glucose Levels After Eating |
| 2007 | NCT00657319 | Glycaemic Control and Quality of Care in Type 2 Diabetes on NovoMix® 30 Previously Treated With Mixtard® Insulins |
| 2007 | NCT00539448 | Gulf, Lantus, Apidra Evaluation in Type 1 Diabetics Study |
| 2007 | NCT00667732 | How Glargine Insulin, Oral Diabetes Medications and Exenatide May Improve Blood Sugar Control and Weight Gain in Type 2 Diabetics (MEXELIN) |
| 2007 | NCT00507494 | Influence of Pioglitazone for Renal Transplant Function in Diabetics |
| 2007 | NCT00346996 | Insulin Analogues and Severe Hypoglycaemia |
| 2007 | NCT00714844 | Insulin Detemir and Waist Circumference |
| 2007 | NCT00562172 | Insulin Glargine (Lantus) vs Sulfonylurea (SU) for BETA Cell Function (BETA Study) |
| 2007 | NCT00467376 | Insulin Glulisine, Insulin Lispro and Insulin Glargine in Type 1 or 2 Diabetes Mellitus |
| 2007 | NCT00411411 | Long Term Effects of DPP-IV Inhibitor Treatment in Patients With Type 2 Diabetes |
| 2007 | NCT01263496 | Long-term Safety Study of Alogliptin in Participants With Type 2 Diabetes in Japan |
| 2007 | NCT01263509 | Long-term Safety Study of Alogliptin Used in Combination With Î±-glucosidase Inhibitor in Participants With Type 2 Diabetes in Japan |
| 2007 | NCT00513201 | Lyspro Insulin vs Regular Insulin in Cirrhotic Patients |
| 2007 | NCT00519142 | Mitiglinide in Combination With Metformin vs. Metformin Alone in Patients With Type 2 Diabetes Mellitus |
| 2007 | NCT00482729 | MK0431A Comparative Study in Patients With Type 2 Diabetes (0431A-079)(COMPLETED) |
| 2007 | NCT00700960 | Observational Study Describing Conditions for Administering Slow-acting Insulin Analogue With Oral Antidiabetic Agents in Type 2 Diabetes on Blood Glucose Control |
| 2007 | NCT00715351 | Observational Study of Patients Using Levemir® or Insulatard® as Start Insulin for Treatment of Diabetes |
| 2007 | NCT00665093 | Observational Study of Patients Using NovoMix® 30 or Levemir® for Treatment of Type 1 or Type 2 Diabetes |
| 2007 | NCT00671008 | Observational Study of Patients Using NovoMix® 30 or Levemir® for Treatment of Type 1 or Type 2 Diabetes |
| 2007 | NCT00698126 | Observational Study of Patients Using NovoRapid® or Soluble Human Insulin for Treatment of Type 2 Diabetes |
| 2007 | NCT00670683 | Observational Study of Patients With Diabetes Using Levemir® FlexPen® |
| 2007 | NCT00709917 | Observational Study of the Switch of Metformin Alone to Metformin Combined With Repaglinide in Type 2 Diabetes(REPAMET) |
| 2007 | NCT00658099 | Observational Study of Type 2 Diabetes Patients Failing on Oral Anti-diabetic Agents Initiated on Levemir® or Insulatard® |
| 2007 | NCT00665808 | Observational Study on Treatment Satisfaction of Levemir® Versus Protaphane® During "Real-life" Usage in Germany |
| 2007 | NCT00675220 | Observational Study to Assess the Efficacy and Safety of NovoRapid Flexpen |
| 2007 | NCT00715663 | Observational Study to Evaluate Safety, Efficacy and Convenience of Using NovoMix® 30 FlexPen® in Type 2 Diabetes |
| 2007 | NCT00706017 | Observational Study to Evaluate the Safety of Levemir® in Diabetes |
| 2007 | NCT00701155 | Observational Study to Evaluate the Safety While Using Levemir® |
| 2007 | NCT00518115 | Out-Patient Study in Patients With Type 2 Diabetes Mellitus Who Are Taking no Diabetes Medication or Metformin Only |
| 2007 | NCT01159353 | Pharmacodynamic and Pharmacokinetic Effects of Insulin Glulisine in Obese Subjects With Type 2 Diabetes After a Standard Meal in Comparison to Insulin Aspart |
| 2007 | NCT00705536 | Pharmacokinetic (PK), Pharmacodynamic (PD), and Safety Study of Subcutaneously Administered Humalog® With and Without Recombinant Human Hyaluronidase (rHuPH20)and Humulin-R® With and Without rHuPH20 |
| 2007 | NCT00825253 | Pharmacokinetics and Pharmacodynamics of Biphasic Insulin Aspart 30 and Biphasic Human Insulin 30 in Type 2 Diabetes |
| 2007 | NCT00497536 | Pharmacokinetics of IAsp Following CSII in Patients With T1DM |
| 2007 | NCT02002975 | Pioglitazone Special Drug Use Surveillance "Metabolic Syndrome in Patients With Type 2 Diabetes Mellitus" |
| 2007 | NCT00815399 | Pioglitazone Versus Metformin in Type 2 Diabetes |
| 2007 | NCT00575874 | Placebo and Active Comparator Controlled Dose Response Study of Rivoglitazone in Type 2 Diabetes (RAISE) |
| 2007 | NCT00442767 | Post-meal Insulin Dosing With Adjuvant Pre-meal Pramlintide in Children With Type 1 Diabetes Mellitus |
| 2007 | NCT00484198 | Randomized, Double-Blind Active Comparator-Controlled Study of Rivoglitazone in Type 2 Diabetes Mellitus |
| 2007 | NCT00476437 | Safety and Effect of Biphasic Insulin Aspart 50 in Patients With Type 2 Diabetes Mellitus. |
| 2007 | NCT00447382 | Safety of Insulin Detemir Produced by a New Process as Measured by Antibody Formation in Subjects With Type 1 Diabetes |
| 2007 | NCT01565733 | Safety of Treatment Initiation With Biphasic Insulin Aspart 30 in Hospitalised Patients With Type 2 Diabetes |
| 2007 | NCT01868555 | Safety, Pharmacokinetics and Pharmacodynamics of Two IDegAsp (One Explorative) Preparations and Two Insulin Degludec (One Explorative) Preparations in Japanese Subjects |
| 2007 | NCT00511108 | Sitagliptin and Pioglitazone Mechanism of Action Study in Type 2 Diabetes Mellitus (0431-061) |
| 2007 | NCT00449930 | Sitagliptin Comparative Study in Patients With Type 2 Diabetes (0431-049) |
| 2007 | NCT00509236 | Sitagliptin Versus Glipizide in Participants With Type 2 Diabetes Mellitus and End-Stage Renal Disease (MK-0431-073 AM1) |
| 2007 | NCT00509262 | Sitagliptin Versus Glipizide in Participants With Type 2 Diabetes Mellitus and Chronic Renal Insufficiency (MK-0431-063 AM1) |
| 2007 | NCT00612144 | Study Comparing Efficacy and Safety of Amaryl M and Metformin Uptitraion to Type 2 DM |
| 2007 | NCT00526513 | Study of Safety and Effectiveness of Apidra® in Combination With Basal Insulin in Patients With Type 1 & 2 Diabetes Mellitus |
| 2007 | NCT00875394 | Study to Assess the Efficacy and Safety of Sitagliptin Added to the Regimen of Patients With Type 2 Diabetes Mellitus With Inadequate Glycemic Control on Metformin (0431-189) |
| 2007 | NCT00474838 | Study To Evaluate Beta Cell Function and Glycemic Outcome by Intensive Insulin Therapy (KIIT) |
| 2007 | NCT00515801 | Sulfonylurea Effects on Glucagon Regulation During Hypoglycemia in Type 1 DM |
| 2007 | NCT00456885 | The Effect of Exenatide on Weight and Hunger in Obese, Healthy Women |
| 2007 | NCT00422058 | The Effect of Liraglutide on Body Weight in Obese Subjects Without Diabetes |
| 2007 | NCT00460304 | The Effect of Pramlintide on Meal Time Insulin Bolus |
| 2007 | NCT00418522 | This Study Is To Determine If Inhaled Insulin Is Effective In Treating Type 2 Diabetes Mellitus |
| 2008 | NCT00666458 | 18-week add-on to Metformin Comparison of Saxagliptin and Sitagliptin in Adult Patients With Type 2 Diabetes (T2D) |
| 2008 | NCT00666718 | A Comparison Study of Basal Bolus Therapies Together With Lispro Insulin in Type 2 Diabetes Patients |
| 2008 | NCT00631007 | A Placebo Controlled Safety and Efficacy Study of INT131 Besylate in Type 2 Diabetes, With an Active Comparator |
| 2008 | NCT00760578 | A Placebo Controlled Safety and Efficacy Study of MSDC-0160 in Type 2 Diabetes With Active Comparator |
| 2008 | NCT00696657 | A Randomised Controlled Clinical Trial in Type 2 Diabetes Comparing Semaglutide to Placebo and Liraglutide |
| 2008 | NCT00740051 | A Randomised, db, Placebo-controlled Study of BI 1356 for 18 Weeks Followed by a 34 Week Double-blind Extension Period (Placebo Patients Switched to Glimepiride) in Type 2 Diabetic Patients for Whom Treatment With Metformin is Inappropriate |
| 2008 | NCT00810589 | A Randomised, Single Centre, Double-Blind, Two-Period Crossover, Glucose Clamp Trial |
| 2008 | NCT00662857 | A Study Designed to Compare 2 Dose Strengths of TI Inhalation Powder in Adults With Type 1 Diabetes Mellitus and to Compare One of Those Formulations (30Units) With an Injection of Insulin Lispro |
| 2008 | NCT00662857 | A Study Designed to Compare 2 Dose Strengths of TI Inhalation Powder in Adults With Type 1 Diabetes Mellitus and to Compare One of Those Formulations (30Units) With an Injection of Insulin Lispro |
| 2008 | NCT00674050 | A Study Designed to Determine if the Drugs Albuterol (Salbutamol) and Fluticasone Have an Effect on the Pharmacokinetics of the Investigational Product Technosphere® Insulin Inhalation Powder in Healthy Volunteers |
| 2008 | NCT00673621 | A Study Designed to Determine if the Pharmacokinetic Disposition of Inhaled Insulin Exposure is the Same for Asthmatics and Non-asthmatics |
| 2008 | NCT00630825 | A Study of Dose Titration of LY2189265 in Overweight Participants With Type 2 Diabetes Mellitus |
| 2008 | NCT00734474 | A Study of LY2189265 Compared to Sitagliptin in Participants With Type 2 Diabetes Mellitus on Metformin |
| 2008 | NCT00717457 | A Study of Taspoglutide Versus Exenatide for the Treatment of Patients With Type 2 Diabetes Mellitus Inadequately Controlled With Metformin, Thiazolidinedione or a Combination of Both. |
| 2008 | NCT00744367 | A Study of Taspoglutide Versus Placebo for the Treatment of Patients With Type 2 Diabetes Mellitus Inadequately Controlled With Metformin Plus Pioglitazone. |
| 2008 | NCT00754988 | A Study of Taspoglutide Versus Sitagliptin for the Treatment of Patients With Type 2 Diabetes Mellitus Inadequately Controlled With Metformin. |
| 2008 | NCT00830076 | A Study of the Effects of Co-Administration of Sitagliptin (MK-0431) and Metformin on Incretin Hormone Concentrations (MK-0431-110) |
| 2008 | NCT00650806 | A Study of the Safety and Effectiveness of Canagliflozin (JNJ-28431754) in Promoting Weight Loss in Overweight and Obese Patients Who do Not Have Diabetes |
| 2008 | NCT00755287 | A Study of the Safety, Tolerability and Effect on Glycemic Control of Taspoglutide Versus Insulin Glargine in Insulin Naive Type 2 Diabetic Patients Inadequately Controlled With Metformin Plus Sulphonylurea. |
| 2008 | NCT00637273 | A Study to Compare the Glycemic Effects, Safety, and Tolerability of Exenatide Once Weekly to Those of Sitagliptin and Pioglitazone, in Subjects With Type 2 Diabetes Treated With Metformin (DURATION - 2) |
| 2008 | NCT00624767 | A Study to Evaluate the Effect of Nasal Insulin on Postprandial Glycemic Control in Type 2 Diabetic Patients |
| 2008 | NCT00638716 | A Study to Evaluate the Efficacy and Safety of CJC-1134-PC in Patients With Type 2 Diabetes Mellitus Who Are Currently on Metformin Monotherapy (DM200-101) |
| 2008 | NCT00541450 | A Study to Evaluate the Efficacy and Safety of Sitagliptin and MK0431A in Comparison to a Commonly Used Medication in Patients With Type 2 Diabetes(0431-068)(COMPLETED) |
| 2008 | NCT00631488 | A Study to Test the Effectiveness and Safety of MK0893 in Combination With Other Drugs Used to Treat Type 2 Diabetes(0893-015) |
| 2008 | NCT00813995 | A Study to Test the Safety and Efficacy of Adding Sitagliptin in Patients With Type 2 Diabetes Mellitus (MK0431-074) |
| 2008 | NCT00701090 | A Study to Test the Safety and Efficacy of Sitagliptin Compared to Glimepiride in Patients With Type 2 Diabetes on a Stable Dose of Metformin (0431-803)(COMPLETED) |
| 2008 | NCT00743002 | A Trial of TT223 in Patients With Type 2 Diabetes Who Are Taking Metformin and/or Thiazolidinedione |
| 2008 | NCT00757367 | A Trial to Determine How Long Insulin and FDKP (the Molecule That Forms Technosphere Particles) Stays in the Lungs of Healthy Individuals After Inhalation of Technosphere® Insulin (TI) Powder Using Bronchoalveolar Lavage (BAL) |
| 2008 | NCT00683878 | Add-on to Thiazolidinedione (TZD) Failures |
| 2008 | NCT01006889 | Adding Exenatide to Insulin Therapy for Patients With Type 2 Diabetes and Non-Alcoholic Fatty Liver Disease |
| 2008 | NCT00765817 | Addition Of Exenatide To Insulin Glargine In Type 2 Diabetes Mellitus |
| 2008 | NCT00971659 | Adjunctive Therapy of Exenatide or Sitagliptin to Insulin Glargine in Type 2 Diabetes |
| 2008 | NCT00643851 | An Efficacy & Safety Study of BMS-512148 in Combination With Metformin Extended Release Tablets |
| 2008 | NCT00642278 | An Efficacy, Safety, and Tolerability Study of Canagliflozin (JNJ-28431754) in Patients With Type 2 Diabetes |
| 2008 | NCT00698269 | An Observational Study of Efficacy and Safety of Modern Insulin in Diabetes Patients Switched From Anti-diabetic Treatment |
| 2008 | NCT00738153 | An Observational Study on Efficacy and Safety in Subjects Using Levemir® for the Treatment of Insulin Dependent Type 1 or Type 2 Diabetes |
| 2008 | NCT00700648 | An Observational Study to Assess Safety and Effectiveness of Intravenous NovoRapid® in Hospitalised Subjects |
| 2008 | NCT00789711 | An Observational Study to Compare the Safety and Effectiveness of NovoMix® 30 and Levemir for the Treatment of Diabetes |
| 2008 | NCT00808860 | Anti-Diabetic Effect of Gynostemma Pentaphyllum Tea as add-on Therapy With Sulfonylureas in Type 2 Diabetic Patients |
| 2008 | NCT00607737 | Applications Site Reactions After Injection of Insulin Detemir and Saline in Subjects With Diabetes |
| 2008 | NCT00770302 | Assess Pharmacokinetics, Safety and Tolerability in Healthy Chinese Volunteers After Oral Doses of Saxagliptin |
| 2008 | NCT00701831 | Assessment of Insulin Glargine in Type 2 Patients for Good Glycemic Control |
| 2008 | NCT00749190 | BI 10773 add-on to Metformin in Patients With Type 2 Diabetes |
| 2008 | NCT00602472 | BI 1356 (Linagliptin) in Combination With Metformin and a Sulphonylurea in Type 2 Diabetes |
| 2008 | NCT01868581 | Bioequivalence Between Two Explorative Insulin Degludec Formulations and Between Two Explorative IDegAsp Formulations in Healthy Subjects |
| 2008 | NCT01464099 | Bioequivalence of Two NovoLog® Formulations in Subjects With Type 1 Diabetes |
| 2008 | NCT00635492 | CHOICE: CHanges to Treatment and Outcomes in Patients With Type 2 Diabetes Initiating InjeCtablE Therapy |
| 2008 | NCT00807092 | Comparing the Efficacy and Safety of Biphasic Insulin Aspart 30 and Biphasic Human Insulin 30 on Blood Sugar Control in Subjects With Type 2 Diabetes |
| 2008 | NCT00522210 | Comparison of a Twice Daily Versus a Three Times Daily Insulin Regimen in Children With Type 1 Diabetes |
| 2008 | NCT01868568 | Comparison of IDegAsp (Inclusive Three Explorative Formulations) With Insulin Degludec and Insulin Aspart Separately Injected in Subjects With Type 1 Diabetes |
| 2008 | NCT01868529 | Comparison of Insulin Degludec With Insulin Glargine in Subjects With Type 1 Diabetes Mellitus |
| 2008 | NCT00781937 | Comparison of Liraglutide Versus Placebo in Weight Loss Maintenance in Obese Subjects: SCALE - Maintenance |
| 2008 | NCT00729326 | Comparison of the Effect of Exenatide Versus Sitagliptin on 24-hour Average Glucose in Patients With Type 2 Diabetes on Metformin or a Thiazolidinedione |
| 2008 | NCT01039532 | Comparison of Thrice Daily Biphasic Human Insulin With Basal Bolus Regimen in Type 2 Diabetes Mellitus Patients |
| 2008 | NCT00611884 | Comparison of Two NN1250 Formulations Versus Insulin Glargine, All in Combination With Metformin in Subjects With Type 2 Diabetes |
| 2008 | NCT00612040 | Comparison of Two NN1250 Formulations Versus Insulin Glargine, All in Combination With Insulin Aspart in Subjects With Type 1 Diabetes |
| 2008 | NCT00613951 | Comparison of Two NN5401 Formulations Versus Biphasic Insulin Aspart 30, All in Combination With Metformin in Subjects With Type 2 Diabetes |
| 2008 | NCT00614055 | Comparison of Two NN5401 Formulations Versus Insulin Glargine, All in Combination With Metformin in Subjects With Type 2 Diabetes |
| 2008 | NCT00659477 | Comparison Safety and Efficacy of Basal Insulin Lantus® (Insulin Glargine) vs NPH Insulin in Combination With Oral Antidiabetic Drugs (OADs) in Patients With Diabetes Mellitus, Type 2 (DMT2) |
| 2008 | NCT01612741 | Diabetes Treatment With Glucobay in Combination With Metformin |
| 2008 | NCT00607945 | Dietary Fatty Acids as Complementary Therapy in Type 2 Diabetes Mellitus (FACT) |
| 2008 | NCT00627445 | Effect of Biphasic Insulin Aspart 50 on Blood Glucose Control in Subjects With Type 2 Diabetes |
| 2008 | NCT00789191 | Effect of Detemir and Sitagliptin on Blood Glucose Control in Type 2 Diabetes |
| 2008 | NCT00775684 | Effect of Exenatide, Sitagliptin or Glimepiride on Functional ß -Cell Mass |
| 2008 | NCT00607087 | Effect of Insulin Glulisine Compared to Insulin Aspart and Insulin Lispro When Administered by Continuous Subcutaneous Insulin Infusion (CSII) on Specific Pump Parameters in Patient With Type 1 Diabetes Mellitus |
| 2008 | NCT00614120 | Effect of Liraglutide or Glimepiride Added to Metformin on Blood Glucose Control in Subjects With Type 2 Diabetes |
| 2008 | NCT00849576 | Effect of Treatment With Insulin VIAjectTM Compared to Regular Human Insulin and Insulin Lispro on Mealtime Blood Vessel Stress in Patients With Type 2 Diabetes Mellitus. |
| 2008 | NCT00634842 | Effect of Two Different Fasting Blood Glucose Targets on Glucose Control in Patients With Type 2 Diabetes Using Insulin Detemir Once Daily |
| 2008 | NCT00835861 | Effectiveness of Metformin Compared to Insulin in Pregnant Women With Mild Preexisting or Early Gestational Diabetes(MIPOD) |
| 2008 | NCT00742976 | Effects of Insulin Detemir and NPH Insulin on Renal Handling of Sodium, Fluid Retention, and Weight in Type 2 Diabetic Patients |
| 2008 | NCT00791479 | Effects of LY2189265 on Glycemic Control in Participants With Type 2 Diabetes |
| 2008 | NCT01156597 | Effects of Pioglitazone on High-density Lipoprotein (HDL) Function in Persons With Diabetes |
| 2008 | NCT00660075 | Effects of Sitagliptin on Postprandial Lipemia in Men With Type 2 Diabetes |
| 2008 | NCT00707993 | Efficacy and Safety of Alogliptin Compared to Glipizide in Elderly Diabetics |
| 2008 | NCT01318109 | Efficacy and Safety of Alogliptin Used Combination With Metformin in Participants With Type 2 Diabetes in Japan |
| 2008 | NCT01318083 | Efficacy and Safety of Alogliptin Used in Combination With Sulfonylurea in Participants With Type 2 Diabetes in Japan |
| 2008 | NCT00601250 | Efficacy and Safety of B I1356 (Linagliptin) vs. Placebo Added to Metformin Background Therapy in Patients With Type 2 Diabetes |
| 2008 | NCT00621140 | Efficacy and Safety of BI 1356 (Linagliptin) Versus Placebo in Type 2 Diabetic Patients With Insufficient Glycemic Control |
| 2008 | NCT00622284 | Efficacy and Safety of BI 1356 in Combination With Metformin in Patients With Type 2 Diabetes |
| 2008 | NCT00680745 | Efficacy and Safety of Dapagliflozin in Combination With Glimepiride (a Sulphonylurea) in Type 2 Diabetes Patients |
| 2008 | NCT00660907 | Efficacy and Safety of Dapagliflozin in Combination With Metformin in Type 2 Diabetes Patients |
| 2008 | NCT00577824 | Efficacy and Safety of Exenatide in Japanese Patients With Type 2 Diabetes Who Are Treated With Oral Antidiabetic(s) |
| 2008 | NCT00728351 | Efficacy and Safety of Fixed Combination Therapy of Vildagliptin and Metformin (25/1000 mg Bid) in Patients With Type 2 Diabetes Inadequately Controlled With Prior Metformin Monotherapy (HbA1c 7.0-9.5%) |
| 2008 | NCT01076842 | Efficacy Evaluation of Different Medication Combination in Type 2 Diabetes Treatment |
| 2008 | NCT00641056 | Efficacy of Exenatide Once Weekly and Once-Daily Insulin Glargine in Patients With Type 2 Diabetes Treated With Metformin Alone or in Combination With Sulfonylurea (DURATION - 3) |
| 2008 | NCT00770640 | Efficacy of Pioglitazone and Insulin in Treating Subjects With Type 2 Diabetes Mellitus and Renal Failure. (PIOren) |
| 2008 | NCT00770445 | Efficacy of Pioglitazone and Metformin on Cardiovascular Risk in Subjects With Insulin-Treated Type 2 Diabetes Mellitus. (PIOcomb) |
| 2008 | NCT01589445 | Efficacy Study of Pioglitazone and Metformin and Association Between Pioglitazone Response and Peroxisome Proliferator-activated Receptor Gamma Gene Variants in Bangladeshi Type 2 Diabetes Mellitus Subjects (T2DMCT) |
| 2008 | NCT00641043 | Efficacy vs Placebo as Initial Combination Therapy With Pioglitazone |
| 2008 | NCT00773279 | Efficacy, Safety and Preference Study of an Insulin Pen PDS290 vs. a Novo Nordisk Marketed Insulin Pen in Diabetics |
| 2008 | NCT00699686 | Endothelial Effects of Basal Insulin: Detemir Versus Glargine |
| 2008 | NCT00698932 | Evaluate Efficacy and Safety of Saxagliptin in Adult Patients With Type 2 Diabetes Inadequate Glycemic Control |
| 2008 | NCT00661362 | Evaluate Efficacy and Safety of Saxagliptin in Combination With Metformin in Adult Patients With Type 2 Diabetes |
| 2008 | NCT00855439 | Evaluation of Exenatide in Patients With Diabetic Neuropathy |
| 2008 | NCT00751114 | Evaluation of Insulin Glargine Versus Sitagliptin in Insulin-naive Patients |
| 2008 | NCT00712673 | GLP-1 Receptor Agonist Lixisenatide (Morning or Evening) in Patients With Type 2 Diabetes for Glycemic Control and Safety Evaluation, on Top of Metformin (GETGOAL-M) |
| 2008 | NCT00688701 | GLP-1 Receptor Agonist Lixisenatide in Patients With Type 2 Diabetes for Glycemic Control and Safety Evaluation in Monotherapy |
| 2008 | NCT00713830 | GLP-1 Receptor Agonist Lixisenatide in Patients With Type 2 Diabetes for Glycemic Control and Safety Evaluation, on Top of Sulfonylurea |
| 2008 | NCT00715624 | GLP-1 Receptor Agonist Lixisenatide in Patients With Type 2 Diabetes for Glycemic Control and Safety Evaluation, on Top of Basal Insulin |
| 2008 | NCT00763451 | GLP-1 Receptor Agonist Lixisenatide in Patients With Type 2 Diabetes for Glycemic Control and Safety Evaluation, on Top of Metformin |
| 2008 | NCT00763815 | GLP-1 Receptor Agonist Lixisenatide in Patients With Type 2 Diabetes for Glycemic Control and Safety Evaluation, on Top of Pioglitazone |
| 2008 | NCT00707031 | GLP-1 Receptor Agonist Lixisenatide Versus Exenatide in Patients With Type 2 Diabetes for Glycemic Control and Safety Evaluation, on Top of Metformin |
| 2008 | NCT00663884 | Glufast On Insulin Glargine Trial in Type 2 DM |
| 2008 | NCT00747383 | How Improvement in Control of Diabetes Influences the Production of a Hormone Produced in the Gut Which Improves the Release and Action of Insulin. (MSD-GLP1) |
| 2008 | NCT00659165 | Insulin Detemir Compared to Insulin Glargine: Appetite and Calories Consumed in Type 1 Diabetes |
| 2008 | NCT00654381 | Japanese P III vs Voglibose and Placebo |
| 2008 | NCT01318122 | Long-term Safety Study of Alogliptin Used in Combination With Thiazolidine in Participants With Type 2 Diabetes in Japan |
| 2008 | NCT00591227 | Management of Diabetes in the Emergency Room: a Randomized Trial of an Insulin Protocol. |
| 2008 | NCT00681460 | Metformin in Gestational Diabetes Mellitus (MetGDM) |
| 2008 | NCT00678080 | Metformin Versus Insulin in Pregnant Women With Type 2 Diabetes |
| 2008 | NCT00722371 | MK0431 and Pioglitazone Co-Administration Factorial Study in Patients With Type 2 Diabetes Mellitus (0431-102 AM2) |
| 2008 | NCT00532935 | MK0431A vs. Pioglitazone in Patients With Type 2 Diabetes Mellitus (0431A-066) |
| 2008 | NCT00709475 | Observational Safety Study in Subjects Using Levemir® (Insulin Detemir) for the Treatment of Type 2 Diabetes Mellitus |
| 2008 | NCT00775736 | Observational Study Evaluating the Safety of NovoMix® in Type 2 Diabetes Patients Previously Treated With a Human Premix Insulin |
| 2008 | NCT00657930 | Observational Study in Type 2 Diabetes Treated by an Intensive Insulin Treatment (ICT) Containing Once Daily Levemir® (Insulin Detemir) |
| 2008 | NCT00687284 | Observational Study of Glycaemic Control in Patients Uncontrolled on Oral Antidiabetic Agents and Starting With 1 (Once) Daily Levemir® (Insulin Detemir) as the Treatment of Type 2 Diabetes Mellitus |
| 2008 | NCT00755833 | Observational Study of NovoMix® 50 for Treatment of Type 2 Diabetics for 12 Months |
| 2008 | NCT00687063 | Observational Study of Safety and Efficacy of Levemir® in Type 2 Diabetes |
| 2008 | NCT00655200 | Observational Study of Safety and Tolerability of Levemir FlexPen (Insulin Detemir) in the Treatment of Type 1 and Type 2 Diabetes Mellitus |
| 2008 | NCT00675493 | Observational Study of Type 1 and Type 2 Diabetes Patients Having Switched From Human Premixes to NovoMix®30 |
| 2008 | NCT00670722 | Observational Study on Blood Glucose Control in Patients With Diabetes Using Modern Insulin |
| 2008 | NCT00676741 | Observational Study on Blood Glucose Control in Patients With Diabetes Using Modern Insulin |
| 2008 | NCT00737776 | Observational Study on Efficacy and Safety in Patients Using NovoMix® 30 for the Treatment of Diabetes |
| 2008 | NCT00849342 | Observational Study on Levemir® in Obese Diabetic Patients |
| 2008 | NCT00740519 | Observational Study on Safety of Self-titration of Once Daily Levemir® |
| 2008 | NCT00869908 | Observational Study on the Effect of NovoMix® 30, Levemir® or NovoRapid® (Alone or Combined) in Type 2 Diabetics Previously Treated With Anti-diabetic Medication |
| 2008 | NCT00697450 | Observational Study on the Weight Effect of Insulin Detemir (Levemir®) in Type 2 Diabetics |
| 2008 | NCT00696163 | Observational Study to Assess the Quality of Life and Clinical Outcomes in Subjects Using NovoMix® 30 for the Treatment of Diabetes |
| 2008 | NCT00715780 | Observational Study to Evaluate Safety and Efficacy of Insulin Therapy in Type 2 Diabetes Mellitus Subjects Failing on Oral Anti-diabetic Agents |
| 2008 | NCT00700765 | Observational Study to Evaluate Safety of Levemir® in Type 1 and Type 2 Diabetes |
| 2008 | NCT00771680 | Observational Study to Evaluate the Effectiveness and Safety of Levemir®, NovoMix® 30 and NovoRapid® in Insulin Naive Subjects With Type 2 Diabetes |
| 2008 | NCT00699179 | Observational Study to Evaluate the Efficacy and Safety of NovoMix® 30 in Type 1 and 2 Diabetes |
| 2008 | NCT00700830 | Observational Study to Evaluate the Safety and Efficacy of Levemir® in Type 2 Diabetes |
| 2008 | NCT00704223 | Observational Study to Evaluate the Safety and Efficacy of NovoMix® 70 in Type 2 Diabetes |
| 2008 | NCT00825643 | Observational Study to Evaluate the Safety of Levemir® in Type 2 Diabetes |
| 2008 | NCT00709683 | Observational Study to Evaluate the Safety of NovoMix® 30 FlexPen® |
| 2008 | NCT00793273 | Observational Study to Observe the Efficacy of Levemir® (Insulin Detemir) in Patients With Type 2 Diabetes. |
| 2008 | NCT00704574 | Observational Study to Observe the Safety of Levemir® Treatment in Children and Adolescents With Type 1 Diabetes |
| 2008 | NCT00735501 | Observational Study to Observe the Safety of Levemir® Treatment in Patients With Type 2 Diabetes |
| 2008 | NCT00729898 | Observational Study to Observe the Safety of NovoMix® 30 Treatment in Patients With Type 2 Diabetes |
| 2008 | NCT00708578 | Optimal Oral Hypoglycaemic Agents (OHA) for Combination With Insulin Glargine (Sulfonylurea vs. Metformin) |
| 2008 | NCT00562250 | Pharmacokinetic Drug Interaction Study With Dapagliflozin and Glimepiride in Healthy Subjects |
| 2008 | NCT00774800 | Phase II Pharmacokinetics Study of Humalog and Humulin-R With and Without rHuPH20 in Type 1 Diabetes Mellitus |
| 2008 | NCT00770367 | Pioglitazone and Serum Asymmetric Dimethylarginine (ADMA) in Patients With Diabetes |
| 2008 | NCT00656864 | Pioglitazone Incretin Study |
| 2008 | NCT00485056 | Pioglitazone on Cardiac Function and Large Arteries (PICCOLA Study) (PICCOLA) |
| 2008 | NCT00819091 | Randomized, Double-blind (db), Placebo-controlled 18 Week Study of Linagliptin (BI 1356) in Type 2 Diabetic Patients With Insufficient Glycaemic Control on a Sulfonylurea Drug |
| 2008 | NCT03030300 | Remission Rate of Newly Diagnosed Type 2 Diabetes Outpatients Treated With Short-term Intensive Insulin Therapy |
| 2008 | NCT00780715 | Response To Oral Agents in Diabetes (ROAD)- Pilot Study (ROAD) |
| 2008 | NCT00734669 | Risk of Hypoglycemia in Type 2 Diabetes |
| 2008 | NCT00633282 | Role of Pioglitazone and Berberine in Treatment of Non-Alcoholic Fatty Liver Disease |
| 2008 | NCT00800683 | Safety and Efficacy in Type 2 Diabetic Patients With Severe Chronic Renal Impairment, 5 mg BI 1356 (Linagliptin) vs. Placebo, Insulin Background Inclusive |
| 2008 | NCT00603239 | Safety and Efficacy of Exenatide in Patients With Type 2 Diabetes Using a Thiazolidinedione or a Thiazolidinedione and Metformin |
| 2008 | NCT00676338 | Safety and Efficacy of Exenatide Once Weekly Injection Versus Metformin, Dipeptidyl Peptidase-4 Inhibitor, or Thiazolidinedione as Monotherapy in Drug-Naive Patients With Type 2 Diabetes (DURATION-4) |
| 2008 | NCT00736099 | Safety and Efficacy of Linagliptin (BI 1356) as Monotherapy or in Combination in Type 2 DM |
| 2008 | NCT00798161 | Safety and Efficacy of Linagliptin (BI 1356) Plus Metformin in Type 2 Diabetes, Factorial Design |
| 2008 | NCT00757588 | Safety and Efficacy of Saxagliptin Plus Insulin With or Without Metformin |
| 2008 | NCT00683657 | Safety and Efficacy Study of Subjects That Are Taking Saxagliptin Added Onto Metformin XR Compared to Subjects Taking Metformin XR Alone |
| 2008 | NCT00616811 | Safety and Tolerability of Vildagliptin Versus Sitagliptin in Patients With Type 2 Diabetes and Severe Renal Insufficiency |
| 2008 | NCT00770081 | Safety and Tolerability of Vildagliptin Versus Sitagliptin in Patients With Type 2 Diabetes and Severe Renal Insufficiency (28-week Extension Study) |
| 2008 | NCT00623194 | Safety Follow-up on Children and Adolescents With Type 1 Diabetes Treated With Insulin Detemir. An Extension to Trial NN304-1689 |
| 2008 | NCT00753896 | Safety of Exenatide Once Weekly in Patients With Type 2 Diabetes Mellitus Treated With Thiazolidinedione Alone or Thiazolidinedione in Combination With Metformin |
| 2008 | NCT00797823 | Sensor-Augmented Insulin Delivery: Insulin Plus Glucagon Versus Insulin Alone |
| 2008 | NCT00686634 | Sitagliptin in Combination With Metformin and Sulfonylurea |
| 2008 | NCT00679939 | Study In Postmenopausal Women With Type 2 Diabetes Looking At Approved Diabetes Drugs And How They Affect Bone Health |
| 2008 | NCT00736515 | Study of Combination Therapy of Gliclazide MR and Basal Insulin Versus Insulin Monotherapy to Treat Type 2 Diabetes(CODMS) |
| 2008 | NCT00673387 | Study to Examine Safety, Tolerability, and Effect on Body Weight of Metreleptin Administered in Conjunction With Pramlintide in Obese and Overweight Subjects |
| 2008 | NCT00693771 | Study to Optimize Insulin Treatment by Basal Regimen With Insulin Glargine in Type-2-Diabetic Patients Previously Uncontrolled on Premixed Insulin |
| 2008 | NCT00745433 | Switch From Metformin Monotherapy to a Bitherapy With Metformin and Repaglinide (REPAMET 2) |
| 2008 | NCT00657943 | The Copenhagen Insulin and Metformin Therapy Trial |
| 2008 | NCT00716092 | The Effect of Linagliptin (BI 1356) on 24h-glucose Control and Various Biomarkers in Type 2 Diabetic Patients |
| 2008 | NCT00700817 | The Effect of Liraglutide Compared to Sitagliptin, Both in Combination With Metformin on Glycaemic Control in Subjects With Type 2 Diabetes Mellitus |
| 2008 | NCT00620282 | The Effect of Liraglutide on Endothelial Function in Subjects With Type 2 Diabetes Mellitus |
| 2008 | NCT01228240 | The Efficacy of Metformin Produced by Pars Mino Co in Comparison With Canadian Apotex Co. in Glycemic Control of Diabetic Patients |
| 2008 | NCT00761540 | To Investigate the Blood Concentration of Liraglutide as Well as the Effects on Glucose and Insulin After 21 Days of Daily Subcutaneous Injections of Liraglutide or Placebo |
| 2008 | NCT00717288 | Transitioning Open Heart Surgery Patients From Insulin Infusions to Detemir |
| 2008 | NCT00614939 | Treatment Effect of Saxagliptin Compared With Placebo in Patients With Type 2 Diabetes and Renal Impairment |
| 2008 | NCT00625781 | Treatment of Impaired Glucose Tolerance in Pregnancy |
| 2008 | NCT00744965 | Treatment of Mild Gestational Diabetes With Glyburide Versus Placebo |
| 2008 | NCT00994682 | University of Texas H.S.C. San Antonio Pioglitazone in Non-Alcoholic Steatohepatitis Trial (UTHSCSA NASH Trial) |
| 2009 | NCT00976937 | 24-week Study Comparing Lixisenatide to Sitagliptin as add-on to Metformin in Obese Type 2 Diabetic Patients Younger Than 50 Years |
| 2009 | NCT00975286 | 24-week Treatment With Lixisenatide in Type 2 Diabetes Insufficiently Controlled With Metformin and Insulin Glargine |
| 2009 | NCT00993473 | 6-month Comparison of Morning Lantus Versus Neutral Protamine Hagedorn Insulin in Young Children With Type 1 Diabetes |
| 2009 | NCT00870194 | A Comparison of Adding Exenatide With Switching to Exenatide in Patients With Type 2 Diabetes Experiencing Inadequate Glycemic Control With Sitagliptin Plus Metformin |
| 2009 | NCT00888732 | A Comparison of Pharmacodynamics and Pharmacokinetics of Insulin Aspart, BIAsp70, BIAsp50 and Fast-acting Human Insulin |
| 2009 | NCT00963768 | A Safety, Tolerability, Pharmacokinetics, and Pharmacodynamics Study of JNJ-28431754 in Patients With Type 2 Diabetes Mellitus |
| 2009 | NCT00989079 | A Single Escalating Dose Study Of Ertugliflozin (PF-04971729, MK-8835) Under Fed and Fasted Conditons In Healthy Volunteers (MK-8835-036) |
| 2009 | NCT01235039 | A Study Evaluating the Bioequivalence of VIAject®7 Compared to VIAject®25 and Comparing the Pharmacokinetic and Pharmacodynamic Properties of VIAject®7 to Insulin Lispro in Subjects With Type 1 Diabetes Mellitus |
| 2009 | NCT01001104 | A Study of LY2189265 in Japanese Patients With Type 2 Diabetes |
| 2009 | NCT00909597 | A Study of Taspoglutide Versus Pioglitazone in Patients With Type 2 Diabetes |
| 2009 | NCT00938158 | A Study of the Pharmacokinetics of Albiglutide in Normal and Renally Impaired Subjects. |
| 2009 | NCT00976391 | A Study to Determine the Safety and Efficacy of Albiglutide Administered in Combination With Insulin Glargine |
| 2009 | NCT00838916 | A Study to Determine the Safety and Efficacy of Albiglutide in Patients With Type 2 Diabetes |
| 2009 | NCT00839527 | A Study to Determine the Safety and Efficacy of Albiglutide in Subjects With Type 2 Diabetes |
| 2009 | NCT00877890 | A Study to Evaluate the Glycemic Effects, Safety, and Tolerability of Exenatide Once Weekly in Subjects With Type 2 Diabetes Mellitus (DURATION-5) |
| 2009 | NCT00917267 | A Study to Examine the Effects of Exenatide Once-Weekly Injection on Glucose Control and Safety in Asian Subjects |
| 2009 | NCT00894322 | A Study to Examine the Pharmacokinetics, Tolerability, Safety and Efficacy of Exenatide Once Weekly Suspension |
| 2009 | NCT00792935 | A Study to Test MK-0941 in Patients With Type 2 Diabetes Mellitus With Inadequate Glycemic Control on Metformin (MK-0941-017) |
| 2009 | NCT00964964 | A Trial Assessing Changes in Blood Sugar and the Number of Periods Where Supplementation of Carbohydrate is Needed to Treat Low Blood Sugar, During Two Different Treatment Regimens of NN1250 in Type 1 Diabetics |
| 2009 | NCT00960661 | A Trial Comparing Two Therapies: Basal Insulin/Glargine, Exenatide and Metformin Therapy (BET) or Basal Insulin/Glargine, Bolus Insulin Lispro and Metformin Therapy (BBT) in Subjects With Type 2 Diabetes |
| 2009 | NCT01030926 | A Trial Investigating the Concentration in the Blood of NN1250 in Children, Adolescents and Adults With Type 1 Diabetes |
| 2009 | NCT00964418 | A Trial Investigating the Effect of NN1250 in Young and Elderly Subjects With Type 1 Diabetes |
| 2009 | NCT01006057 | A Trial Investigating the NN1250 Concentration-time Curve in Subjects With Various Degrees of Renal Impairment and in Subjects With Normal Renal Function |
| 2009 | NCT00976326 | A Trial Investigating the Pharmacokinetic (Mode of Action in the Body) and Safety Profiles of NN1250 (Insulin Degludec) in Subjects With Various Degrees of Impaired Liver Function and in Subjects With Normal Liver Function |
| 2009 | NCT00961324 | A Trial Investigating the Within-subject Variability of NN1250 in Subjects With Type 1 Diabetes |
| 2009 | NCT00993304 | A Trial to Assess the Effect of Liraglutide on Blood Triglyceride (Fat) Levels After a Meal in Type 2 Diabetics |
| 2009 | NCT01028404 | A Two Part Trial Investigating NN1952 in Healthy Subjects and Subjects With Type 1 and Type 2 Diabetes |
| 2009 | NCT00934570 | Activity and Metformin Intervention in Obese Adolescents (REACH) |
| 2009 | NCT01195090 | Adding Sitagliptin or Pioglitazone to Type 2 Diabetes Mellitus Insufficiently Controlled With Metformin and Sulfonylurea (JAS) |
| 2009 | NCT00960076 | An 18 Week Efficacy and Safety Study of Saxagliptin and Metformin XR Combination in Subjects With Type 2 Diabetes (SCORE) |
| 2009 | NCT01022112 | An Efficacy, Safety, and Tolerability Study for TA-7284 in Patients With Type 2 Diabetes |
| 2009 | NCT00842192 | An Observational Study in Type 2 Diabetic Patients on Oral Antidiabetic Drugs and Basal Insulin in Near East Countries |
| 2009 | NCT01357135 | An Observational Study of Type II Diabetics Treated With Dual Therapy With or Without Sitagliptin (Januvia®/Xelevia®, MK-0431-201) |
| 2009 | NCT01206712 | Beta Cell Relieving and Cardiovascular Protective Effects of LANTUS Treatment in Type 2 Diabetes Patients |
| 2009 | NCT00897390 | Bioequivalence Study of Saxagliptin and Glucophage Combination Formulations in Healthy Subjects (B) |
| 2009 | NCT00899470 | Bioequivalence Study of Saxagliptin and Glucophage Combination Formulations in Healthy Subjects (A) |
| 2009 | NCT01192139 | Bioequivalence Study of the Fixed Dose Combination of 5 mg Saxagliptin and 500 mg Metformin XR Tablet (Manufactured in Mt Vernon, IN) Relative to 5 mg Saxagliptin Tablet and 500 mg Metformin XR Tablet (Manufactured in Evansville, IN) |
| 2009 | NCT01192152 | Bioequivalence Study of the Fixed Dose Combination of 5 mg Saxagliptin/1000 mg Metformin XR (Manufactured in Mt Vernon, IN) Relative to 5 mg of Onglyza and 2 Ã— 500 mg Glucophage XR |
| 2009 | NCT00778622 | Body Weight Effects on Glucophage's Efficacy in Chinese Diagnosed T2DM Patients |
| 2009 | NCT00968812 | CANagliflozin Treatment And Trial Analysis-Sulfonylurea (CANTATA-SU) SGLT2 Add-on to Metformin Versus Glimepiride |
| 2009 | NCT01032629 | CANVAS - CANagliflozin cardioVascular Assessment Study |
| 2009 | NCT00968708 | Cardiovascular Outcomes Study of Alogliptin in Patients With Type 2 Diabetes and Acute Coronary Syndrome |
| 2009 | NCT01249677 | Chronic Reduction of Fasting Glycaemia With Insulin Glargine Improves First and Second Phase Insulin Secretion in Patients With Type 2 Diabetes |
| 2009 | NCT00789750 | Colesevelam as Add-on to Pioglitazone Therapy for Type 2 Diabetes Mellitus |
| 2009 | NCT01223560 | Collection of Information-Rich Type 1 Diabetes Data |
| 2009 | NCT00924573 | Comparative Study of HOE490 O (Glimepiride and Metformin) Compared With Placebo on Top of Glimepiride |
| 2009 | NCT00965549 | Comparison of a Basal Plus One Insulin Regimen With a Biphasic Insulin Regimen in Type 2 Diabetes Patients |
| 2009 | NCT00978263 | Comparison of Glargine and Oral Antidiabetic Drugs (OADs) in Newly Diagnosed Type 2 Diabetes |
| 2009 | NCT01002768 | Comparison of Hypoglycaemic Response Between NN1250 and Insulin Glargine in Type 1 Diabetics |
| 2009 | NCT02040246 | Comparison of Metformin and Repaglinide Monotherapy in the Treatment of New Onset Type 2 Diabetes Mellitus in China |
| 2009 | NCT00982228 | Comparison of NN1250 Plus Insulin Aspart With Insulin Glargine Plus Insulin Aspart in Type 1 Diabetes |
| 2009 | NCT00841087 | Comparison of NN1250 Versus Insulin Detemir, Both Combined With Insulin Aspart in Subjects With Type 1 Diabetes |
| 2009 | NCT00982644 | Comparison of NN1250 Versus Insulin Glargine in Subjects With Type 2 Diabetes |
| 2009 | NCT01006291 | Comparison of NN1250 With Insulin Glargine in Type 2 Diabetes |
| 2009 | NCT00972283 | Comparison of NN1250 With Insulin Glargine Plus Insulin Aspart With/Without Metformin and With/Without Pioglitazone in Type 2 Diabetes (BEGIN™) |
| 2009 | NCT00978627 | Comparison of NN5401 Plus Insulin Aspart With Insulin Detemir Plus Insulin Aspart in Type 1 Diabetes |
| 2009 | NCT00842361 | Comparison of NN5401 Versus Biphasic Insulin Aspart 30 on a Twice Daily Regimen in Subjects With Type 2 Diabetes Mellitus |
| 2009 | NCT01009580 | Comparison of NN5401 With Biphasic Insulin Aspart 30 in Type 2 Diabetes |
| 2009 | NCT01022762 | Comparison of Repaglinide and Gliclazide in Chinese Subjects With Type 2 Diabetes Never Received Oral Antidiabetic Drug Treatment |
| 2009 | NCT00819741 | Comparison of the Blood Sugar Lowering Effect Between Repaglinide Plus Metformin and Repaglinide Alone in Type 2 Diabetics Not Previously Treated With Oral Sugar-lowering Drugs |
| 2009 | NCT00795600 | Comparison of the Change in Fat Distribution in Overweight and Obese Subjects With Type 2 Diabetes After Insulin Treatment |
| 2009 | NCT00992537 | Comparison of the Effect of NN5401 With the Effect of NN1250 and Insulin Aspart in Type 1 Diabetics |
| 2009 | NCT00966368 | Comparison of Two NN1250 Formulations in Healthy Volunteers |
| 2009 | NCT00984867 | Dapagliflozin DPPIV Inhibitor add-on Study |
| 2009 | NCT01302145 | Drug to Drug Interaction Study With ASP1941 and Metformin |
| 2009 | NCT00909480 | Effect of Insulin Detemir and Insulin Glargine on Blood Glucose Control in Subjects With Type 2 Diabetes |
| 2009 | NCT00941161 | Effect of Oral Combination Therapy in a Single Dosage Form in Patients With Type 2 Diabetes Mellitus |
| 2009 | NCT01223196 | Effect of Pioglitazone on TIMP-3 and TACE in Type 2 Diabetes (PIO-TACE) |
| 2009 | NCT01935804 | Effect of Pioglitazone Versus Metformin on Bone Health in Postmenopausal Women With Type 2 Diabetes (Pioglitazone) |
| 2009 | NCT01165944 | Effectiveness Study of Pramlintide to Treat Post-Transplant Diabetes Mellitus |
| 2009 | NCT00860288 | Efficacy and Long-Term Safety of Vildagliptin as Add-on Therapy to Metformin in Patients With Type 2 Diabetes |
| 2009 | NCT00838903 | Efficacy and Safety of Albiglutide in Treatment of Type 2 Diabetes |
| 2009 | NCT00856284 | Efficacy and Safety of Alogliptin Plus Metformin Compared to Glipizide Plus Metformin in Patients With Type 2 Diabetes Mellitus (ENDURE) |
| 2009 | NCT01023581 | Efficacy and Safety of Alogliptin Plus Metformin in Patients With Type 2 Diabetes (AM7D) |
| 2009 | NCT01011868 | Efficacy and Safety of BI 10773 in Combination With Insulin in Patients With Type 2 Diabetes |
| 2009 | NCT00908921 | Efficacy and Safety of Glimepiride as Oral Anti-Diabetic (OAD) Initiation Mono-therapy in Chinese Type 2 Diabetes Mellitus (T2DM) (GREAT) |
| 2009 | NCT00954447 | Efficacy and Safety of Linagliptin in Combination With Insulin in Patients With Type 2 Diabetes |
| 2009 | NCT00971243 | Efficacy and Safety of MP-513 in Combination With Metformin in Patients With Type 2 Diabetes |
| 2009 | NCT00770835 | Efficacy and Safety of Pioglitazone in Treating Subjects With Vascular Complications Associated With Type 2 Diabetes Mellitus. (SPLENDOR) |
| 2009 | NCT01007097 | Efficacy and Safety of TAK-875 in Subjects With Type 2 Diabetes Mellitus |
| 2009 | NCT00974090 | Efficacy and Safety Study of MP-513 in Combination With Sulfonylurea in Patients With Type 2 Diabetes |
| 2009 | NCT01026194 | Efficacy and Safety Study of MP-513 in Combination With Thiazolidinedione in Patients With Type 2 Diabetes |
| 2009 | NCT00885378 | Efficacy and Safety Study of Saxagliptin + Metformin Immediate Release (IR) Versus Metformin IR Alone in Type 2 Diabetes Mellitus |
| 2009 | NCT01006590 | Efficacy and Tolerability of Saxagliptin add-on Compared to Uptitration of Metformin in Patients With Type 2 Diabetes (PROMPT) |
| 2009 | NCT00942318 | Efficacy of Continuous Subcutaneous Insulin Infusion Versus Basal-bolus Multiple Daily Injections Regimen in Type 2 Diabetes |
| 2009 | NCT01003184 | Efficacy of Once-Weekly Exenatide Versus Once or Twice Daily Insulin Detemir in Patients With Type 2 Diabetes |
| 2009 | NCT00913367 | Efficacy/Safety Study of Amaryl®M 1/500 mg Twice Daily Versus Amaryl® 4 mg Both in Combination With Lantus® in Type 2 Diabetes Mellitus |
| 2009 | NCT01020123 | Evaluate Efficacy, Safety and Tolerability of AZD1656 as Add-on Treatment to Metformin in Type 2 Diabetes Mellitus (TD2M) Patients |
| 2009 | NCT00918879 | Evaluate Saxagliptin in Adult Indian Patients With Type 2 Diabetes Inadequate Glycemic Control |
| 2009 | NCT01145534 | Evaluation of Cissus Verticillata L. Infusion in Controlling Type 2 Diabetes |
| 2009 | NCT00851903 | Evaluation of Insulin Glargine in Combination With Sitagliptin in Type 2 Diabetes Patients: EASIE Extension Trial |
| 2009 | NCT00855166 | Evaluation of the Effect of Dapagliflozin in Combination With Metformin on Body Weight in Subjects With Type 2 Diabetes |
| 2009 | NCT00873223 | Examination of the Effects of Liraglutide on the Mode of Action of Insulin Detemir |
| 2009 | NCT00923715 | Exenatide (Byetta) Versus Pramlintide (Symlin): Role in Post-Prandial Hyperglycemia |
| 2009 | NCT00819234 | Extension Study of Protocol DFA102 to Examine the Long-Term Safety, Tolerability, and Effect on Body Weight of Pramlintide Administered in Combination With Metreleptin |
| 2009 | NCT00975065 | Galvus on Met Phase 4 Study : Study to Evaluate the Efficacy and Safety of Early Combination of Vildagliptin and Metformin in Patients With Type 2 Diabetes Mellitus |
| 2009 | NCT00911625 | Glargine Dosing in Hospitalized Patients With Type 2 Diabetes and Renal Insufficiency |
| 2009 | NCT00866658 | GLP-1 +E350Receptor Agonist Lixisenatide in Patients With Type 2 Diabetes for Glycemic Control and Safety Evaluation, on Top of Basal Insulin +/- Sulfonylurea (GETGOAL-L-ASIA) |
| 2009 | NCT00905255 | GLP-1 Receptor Agonist Lixisenatide in Patients With Type 2 Diabetes for Glycemic Control and Safety Evaluation in Monotherapy (GETGOAL-MONO Japan LTS) |
| 2009 | NCT00970528 | Glucose Reduction by Early Acarbose Treatment in Basal Insulin (GREAN) |
| 2009 | NCT00941369 | Health Assessment, Patient Treatment Satisfaction and Quality-of-Life in Insulin-Naive Type 2 Diabetes Patients |
| 2009 | NCT00626080 | Insulin Detemir Action in Cerebro |
| 2009 | NCT00857870 | Insulin Glargine First Line vs Metformin in Type 2 Diabetic Subjects (GLORY) |
| 2009 | NCT00993096 | Investigation of the Response Relationship of NN5401 in Type 1 Diabetics |
| 2009 | NCT00949442 | Lantus Versus NPH: Comparison in Insulin Naive People Not Adequately Controlled With at Least One Oral Anti Diabetics (OAD) Treatment (LANCELOT) |
| 2009 | NCT00862875 | Levemir-Body Composition and Energy Metabolism |
| 2009 | NCT01012037 | Linagliptin 2.5 mg Twice Daily Versus 5 mg Once Daily as add-on Therapy to Twice Daily Metformin in Type 2 Diabetes |
| 2009 | NCT00996658 | Linagliptin Versus Placebo in Type 2 Diabetic Patients With Inadequate Glycaemic Control on Metformin in Combination With Pioglitazone |
| 2009 | NCT00916357 | Liquid Meal Study With Insulin Lispro With/Without Recombinant Human Hyaluronidase PH20 (rHuPH20) and Regular Human Insulin With rHuPH20 to Compare Pharmacokinetics, Postprandial Glycemic Response, and Optimal Insulin Dose in Participants With Type 2 Diabetes Mellitus (T2DM) |
| 2009 | NCT00931372 | Lixisenatide for Restoration of Insulin Release in Subjects With Diabetes Mellitus Type 2 |
| 2009 | NCT01318135 | Long-term Safety Study of Alogliptin Used in Combination With Sulfonylurea or Metformin in Participants With Type 2 Diabetes in Japan |
| 2009 | NCT02314637 | Long-term Safety Study of MP-513 as Monotherapy or in Combination With Sulfonylurea in Japanese Type 2 Diabetic Patients |
| 2009 | NCT01195259 | Malignancy Meta Analysis for BRL49653 |
| 2009 | NCT01122316 | Management of Diabetes With Metformin In Patients With Chronic Heart Failure |
| 2009 | NCT00820573 | Mechanisms of Glucose Lowering Effects of Sitagliptin and Metformin Alone and in Combination in Patients With T2DM |
| 2009 | NCT00854035 | MK-0431/ONO-5435 Phase III Clinical Trial - Insulin Add-on Study for Patients With Type 2 Diabetes Mellitus |
| 2009 | NCT00837577 | MK0431/ONO-5435 Phase III Clinical Trial -Add-on to Voglibose Study for Patients With Type 2 Diabetes Mellitus (MK0431-104) |
| 2009 | NCT00865397 | Observational Study in Type 2 Diabetics Failing on Oral Antidiabetic Therapy and Starting on Insulin Treatment |
| 2009 | NCT00806897 | Observational Study in Type 2 Diabetics Treated by an Intensive Insulin Treatment of Levemir® |
| 2009 | NCT00873639 | Observational Study of Type 1 Diabetics Switching From Human Insulins to Modern Insulin Analogues |
| 2009 | NCT00834262 | Observational Study on Safety and Efficacy of Biphasic Insulin Aspart in Type 2 Diabetes Patients |
| 2009 | NCT00862849 | Pharmacokinetic and Glucodynamic Crossover Study of Subcutaneously (SC) Administered Insulin Lispro + Recombinant Human Hyaluronidase (rHuPH20) and Regular Human Insulin + rHuPH20 Compared to Insulin Lispro Alone |
| 2009 | NCT00842556 | Pharmacokinetic Drug Interaction Study of Dapagliflozin and Glimepiride or Sitagliptin in Healthy Subjects |
| 2009 | NCT00935467 | Pharmacokinetics and Pharmacodynamics Study of Saxagliptin in Healthy Subjects |
| 2009 | NCT00935220 | Pharmacokinetics and Pharmacodynamics Trial With Linagliptin (BI 1356) 5mg in African American Type 2 Diabetic Patients |
| 2009 | NCT00957268 | Pharmacokinetics, Pharmacodynamics, and Safety of Alogliptin in Children, Adolescents and Adults With Type 2 Diabetes Mellitus |
| 2009 | NCT01602003 | Phase III Trial to Evaluate the Efficacy and Safety of LC15-0444 Compared With Sitagliptin Added to Ongoing Metformin Therapy in Patients With Type 2 Diabetes |
| 2009 | NCT00964184 | Phenotypic and Genetic Correlates of Diabetes (Non-Type 1) in Young Non-Obese Asian Indians in North India and A Study to Evaluate the Efficacy of Sitagliptin (DPP-4 Inhibitor) in a Sub-group of the Study Population |
| 2009 | NCT02003014 | Pioglitazone Tablets Special Drug Use Surveillance "Combined Use of Biguanides / Long-term Treatment" |
| 2009 | NCT02068508 | Pioglitazone Tablets Special Drug Use Surveillance "Combined Use of Insulin Products / Long-term Treatment" |
| 2009 | NCT02181842 | Pioglitazone Tablets Specified Drug-use Survey <Survey on Glycemic Control in Type 2 Diabetic Patients With a History of Cerebral Infarction> |
| 2009 | NCT00842075 | Pramlintide in Adolescents With Type 1 Diabetes |
| 2009 | NCT00969566 | Predictive Parameters for Efficacy of Sitagliptin and Metformin Combination (COSMETIC) |
| 2009 | NCT00683735 | Quantification of the Dipeptidyl Peptidase (DPP)-4 Inhibition-mediated Enhancement of the Activity of the Entero-insular Axis |
| 2009 | NCT00849056 | Safety and Efficacy of Albiglutide in Type 2 Diabetes |
| 2009 | NCT00995345 | Safety and Efficacy of Once-Daily KRP-104 in Type 2 Diabetics With Inadequate Glycemic Control on Metformin Alone (Synergy104) |
| 2009 | NCT00849017 | Safety and Efficacy Study of Albiglutide in Type 2 Diabetes |
| 2009 | NCT01882907 | Safety and Efficacy Study to Compare Vildagliptin to Pioglitazone as Adding on Metformin in Type 2 Diabetes |
| 2009 | NCT00983021 | Safety and Tolerability of NN9068 in Healthy Male Volunteers |
| 2009 | NCT00943501 | Safety of Liraglutide in Pediatric Patients With Type 2 Diabetes |
| 2009 | NCT00842894 | Safety of NovoMix® 30 or Levemir® for Treatment of Type 2 Diabetics in Macedonia |
| 2009 | NCT00883558 | Safety Study of Subcutaneously-Injected Prandial INSULIN-PH20 NP Compared to Insulin Lispro Injection in Participants With Type 1 Diabetes Mellitus |
| 2009 | NCT00790699 | Safety Study of Using Symlin Alongside Insulin in a Multiple Injection Port |
| 2009 | NCT01006603 | Saxagliptin Compared to Glimepiride in Elderly Type 2 Diabetes Patients, With Inadequate Glycemic Control on Metformin(GENERATION) |
| 2009 | NCT01013571 | Self Titration With Apidra to Reach Target Study (START) |
| 2009 | NCT00885352 | Sitagliptin (MK-0431) vs. Placebo in Patients With Inadequate Glycemic Control on Metformin With Pioglitazone (MK-0431-128) |
| 2009 | NCT01065766 | Sitagliptin/Metformin (JANUMET) Re-examination Study (0431A-182) |
| 2009 | NCT00859898 | Study of Dapagliflozin in Combination With Metformin XR to Initiate the Treatment of Type 2 Diabetes |
| 2009 | NCT00943917 | Study of ITCA 650 (Exenatide in DUROS) in Subjects With Type 2 Diabetes Mellitus |
| 2009 | NCT00858013 | Study of the Durability of Glycemic Control With Nateglinide |
| 2009 | NCT00940472 | Study on DMMET-01 Versus Metformin on Improvement of Metabolic Control in Naive Type 2 Diabetes Patients (DMMET2) |
| 2009 | NCT00918138 | Study To Evaluate 24 Hour Blood Sugar Control (24-hour Mean Weighted Glucose) In Subjects That Are Taking Saxagliptin 5 mg Added Onto Metformin XR 1500 XR mg Compared To Subjects Taking Metformin XR 1500 mg Up-titrated To Metformin XR 2000 mg |
| 2009 | NCT00935532 | Study to Evaluate the Efficacy and Safety of Exenatide Once-Weekly Injection Compared to Once-Daily Insulin in Type 2 Diabetes Mellitus |
| 2009 | NCT00957060 | Superiority of Glimepiride Over Sitagliptin in Naive Type 2 Diabetes Patients (SUMER) |
| 2009 | NCT00964574 | Test of the Efficacy and Safety of Insulin Glulisine Injected Subcutaneously in Patients With Type 1 Diabetes Mellitus |
| 2009 | NCT00950677 | The Effect of Byetta and Symlin on Post-meal Meal Blood Sugar Levels in Children With Type 2 Diabetes |
| 2009 | NCT00856986 | The Effect of Insulin Detemir in Combination With Liraglutide and Metformin Compared to Liraglutide and Metformin in Subjects With Type 2 Diabetes |
| 2009 | NCT00913497 | The Effect of Insulin Glulisine Compared With Insulin Aspart on Breakfast Post Prandial Glucose Levels in Prepubertal Children |
| 2009 | NCT01140438 | Treatment of Latent Autoimmune Diabetes of the Adult (LADA) |
| 2009 | NCT00915772 | Treatment of Type 2 Diabetes With Linagliptin 2.5 mg Bid + Metformin 500 or 1000 mg Bid and Metformin 1000 mg Bid |
| 2009 | NCT01269047 | Use of Exenatide and Pramlintide to Decrease Post-prandial Hyperglycemia |
| 2009 | NCT00821795 | Veterans Inpatient Insulin Study and Transition to Outpatient Therapy |
| 2010 | NCT01183013 | 30 Week Parallel Group Comparison Study of Linagliptin + Pioglitazone (5+15, 5+30 and 5+45 mg) qd Versus Respective Monotherapies, Followed by a Comparison of 5mg+30mg and 5mg+45mg Versus Respective Monotherapies in Type 2 Diabetes for up to 54 Weeks |
| 2010 | NCT01125553 | A Comparison Between Two Formulations of NN5401 in Healthy Subjects |
| 2010 | NCT01217073 | A Dose-Range Finding Study in Participants With Type 2 Diabetes (MK-3102-006) |
| 2010 | NCT01147718 | A Drug Interaction Study of Albiglutide and Digoxin |
| 2010 | NCT01147692 | A Drug Interaction Study of Simvastatin and Albiglutide |
| 2010 | NCT01147731 | A Drug Interaction Study With Albiglutide and Warfarin |
| 2010 | NCT01034111 | A Local Experiential Study With Sitagliptin (an Antihyperglycemic Drug) in 30 Patients With Type 2 Diabetes Mellitus (0431-178) |
| 2010 | NCT01088594 | A Methodological Study To Evaluate The Effects of Single Oral Doses Of Pioglitazone 45 mg And Rosiglitazone 8 mg On Sodium Balance In Healthy Male Volunteers |
| 2010 | NCT01059812 | A Pan Asian Trial Comparing Efficacy and Safety of NN5401 and Biphasic Insulin Aspart 30 in Type 2 Diabetes |
| 2010 | NCT01128985 | A Pharmacokinetic and Pharmacodynamic Study to Determine Blood Levels of JNJ-28431754 (Canagliflozin) in Patients With Type 2 Diabetes Mellitus |
| 2010 | NCT01127308 | A Radiolabeled Mass Balance Study of [14C]-Ertugliflozin (PF04971729, MK-8835) In Healthy Male Participants (MK-8835-038) |
| 2010 | NCT01106651 | A Safety and Efficacy Study of Canagliflozin in Older Patients (55 to 80 Years of Age) With Type 2 Diabetes Mellitus |
| 2010 | NCT01177163 | A Safety, Tolerability, Pharmacokinetics, and Pharmacodynamics Study of JNJ-28431754 in Patients With Type 2 Diabetes Mellitus |
| 2010 | NCT01253304 | A Single Dose Study of LY2189265 in Subjects With Varying Degrees of Hepatic (Liver) Impairment |
| 2010 | NCT01049412 | A Study for Patients With Type 1 Diabetes |
| 2010 | NCT01027871 | A Study for Patients With Type 2 Diabetes |
| 2010 | NCT01481779 | A Study in Participants With Type 1 Diabetes Mellitus |
| 2010 | NCT01064687 | A Study in Participants With Type 2 Diabetes Mellitus (AWARD-1) |
| 2010 | NCT01075282 | A Study in Participants With Type 2 Diabetes Mellitus (AWARD-2) (AWARD-2) |
| 2010 | NCT01126580 | A Study in Participants With Type 2 Diabetes Mellitus (AWARD-3) |
| 2010 | NCT01191268 | A Study in Participants With Type 2 Diabetes Mellitus (AWARD-4) |
| 2010 | NCT01043029 | A Study of Aleglitazar in Type 2 Diabetes Patients With Moderate Renal Impairment |
| 2010 | NCT01230749 | A Study of Multiple Oral Doses of JNJ-41443532 in Patients With Type 2 Diabetes Mellitus |
| 2010 | NCT01149421 | A Study of the Effect of LY2189265 on Blood Pressure and Heart Rate in Type 2 Diabetes |
| 2010 | NCT01098539 | A Study of the Efficacy and Safety of Albiglutide in Subjects With Type 2 Diabetes With Renal Impairment. |
| 2010 | NCT01135433 | A Study to Assess the Efficacy and Safety of ASP1941 in Combination With Metformin in Type 2 Diabetic Patients |
| 2010 | NCT01225081 | A Study to Assess the Efficacy and Safety of ASP1941 in Combination With Pioglitazone in Type 2 Diabetic Patients |
| 2010 | NCT01242215 | A Study to Assess the Efficacy and Safety of ASP1941 in Combination With Sulfonylurea in Type 2 Diabetic Patients |
| 2010 | NCT01242228 | A Study to Assess the Safety and Efficacy of ASP1941 in Combination With Dipeptidyl Peptidase-4 (DPP-4) Inhibitor in Type 2 Diabetic Patients |
| 2010 | NCT01128894 | A Study to Determine the Efficacy and Safety of Albiglutide as Compared With Liraglutide. |
| 2010 | NCT01117584 | A Study to Evaluate the Effect of ASP1941 in Combination With Metformin in Adult Patients With Type 2 Diabetes Mellitus (BALANCE) |
| 2010 | NCT01028963 | A Study to Evaluate the Safety and Efficacy of CCX140-B in Subjects With Type 2 Diabetes Mellitus |
| 2010 | NCT01076075 | A Study to Evaluate the Safety and Efficacy of Sitagliptin 100 mg in Participants With Type 2 Diabetes Mellitus Who Have Inadequate Glycemic Control (MK-0431-229) |
| 2010 | NCT01104701 | A Study to Examine the Efficacy, Safety and Tolerability, and Pharmacokinetics of Exenatide Once Monthly Suspension |
| 2010 | NCT01151072 | A Trial Comparing the Effect of NN1250 After Different Routes of Injection in Healthy Subjects |
| 2010 | NCT01154881 | A Trial Evaluating the Blood Glucose-lowering Effect of NN1250 in Subjects With Type 2 Diabetes |
| 2010 | NCT01114542 | A Trial Evaluating the Effect of NN1250 at Steady State Conditions in Subjects With Type 1 Diabetes |
| 2010 | NCT01121276 | A Trial Investigating NN1218 in Subjects With Type 1 and Type 2 Diabetes |
| 2010 | NCT01121289 | A Trial Investigating NN1218 in Subjects With Type 1 Diabetes |
| 2010 | NCT01135927 | A Trial Investigating the Effect of NN1250 in Japanese Subjects With Type 1 Diabetes |
| 2010 | NCT01134224 | A Trial Investigating the Effect of NN5401 in Subjects With Type 2 Diabetes |
| 2010 | NCT01174303 | A Trial Investigating the Exposure of NN5401 in Young Adults and Elderly Subjects With Type 1 Diabetes |
| 2010 | NCT01138488 | A Trial Investigating the Total Exposure of NN5401 (Insulin Degludec/Insulin Aspart) in Children, Adolescents and Adult Subjects With Type 1 Diabetes |
| 2010 | NCT01204580 | ADIponectin and Asymmetric Dimethylarginine (ADMA) Level in Type-2 Diabetes Patients After 12 Weeks of Treatment With GlimepiRide And Metformin Fixed Dose Combination (DIAGRAM) |
| 2010 | NCT01064414 | An Efficacy, Safety, and Tolerability Study of Canagliflozin in Patients With Type 2 Diabetes Mellitus Who Have Moderate Renal Impairment |
| 2010 | NCT01077505 | An Evaluation of the Pharmacokinetics of an Oral Contraceptive (Brevicon) When Co-administered With Albiglutide . |
| 2010 | NCT01204593 | baSal BoluS Therapy in patIenTs With TypE 1 Diabetes Mellitus |
| 2010 | NCT00979628 | Basal Bolus Versus Basal Insulin in Type 2 Diabetes Mellitus (T2DM) |
| 2010 | NCT01068717 | Bioequivalence Study of 2.5-mg Saxagliptin and 500-mg Glucophage in Tablets and a Fixed-dose Combination Tablet in Healthy Participants |
| 2010 | NCT01068743 | Bioequivalence Study of Fixed Dose Combination of 2.5 mg Saxagliptin/850 mg Metformin Tablet Relative to 2.5 mg Onglyza and 850 mg Glucophage Tablets Co-Administered |
| 2010 | NCT01243424 | CAROLINA: Cardiovascular Outcome Study of Linagliptin Versus Glimepiride in Patients With Type 2 Diabetes |
| 2010 | NCT01444248 | Compare the Compliance of Patients Treated With Once-daily (od) or Twice-daily (Bid) Glimepiride and Metformin Fixed Combination Therapy |
| 2010 | NCT01212913 | Comparison of Insulin Glargine/Insulin Glulisine Regimen to Insulin Aspart/Insulin Aspart Protamine 30/70 in Type 2 Diabetes Mellitus Patients (T2DM) |
| 2010 | NCT01074268 | Comparison of NN1250 Plus Insulin Aspart With Insulin Detemir Plus Insulin Aspart in Type 1 Diabetes |
| 2010 | NCT01059799 | Comparison of NN1250 Versus Insulin Glargine in Subjects With Type 2 Diabetes |
| 2010 | NCT01068665 | Comparison of NN1250 With Insulin Glargine in Subjects With Type 2 Diabetes |
| 2010 | NCT01068678 | Comparison of NN1250 With Insulin Glargine in Subjects With Type 2 Diabetes |
| 2010 | NCT01076647 | Comparison of NN1250 With Insulin Glargine in Subjects With Type 2 Diabetes |
| 2010 | NCT01079234 | Comparison of NN1250 With Insulin Glargine in Type 1 Diabetes |
| 2010 | NCT01046110 | Comparison of NN1250 With Sitagliptin in Subjects With Type 2 Diabetes Never Treated With Insulin |
| 2010 | NCT01045707 | Comparison of NN5401 Versus Insulin Glargine, Both Combined With Metformin Treatment, in Subjects With Type 2 Diabetes(BOOST™) |
| 2010 | NCT01045447 | Comparison of NN5401 With Insulin Glargine, Both in Combination With Oral Antidiabetic Drugs, in Subjects With Type 2 Diabetes |
| 2010 | NCT01293396 | Comparison of Premixed Insulins Aspart 30, Aspart 70 and Aspart on Postprandial Lipids |
| 2010 | NCT01203774 | Comparison of SoloSTAR With a Syringe-administered Glargine Insulin in Diabetic Patients From the Hospital |
| 2010 | NCT01123980 | Comparison of the Blood Sugar Lowering Effect of Biphasic Insulin Aspart 30 and Insulin Glargine Both Combined With Metformin and Glimepiride in Chinese and Japanese Subjects With Type 2 Diabetes New to Insulin Treatment (EasyMix) |
| 2010 | NCT01173926 | Comparison of the Effect of NN5401 With the Effect of NN1250 and Insulin Aspart in Subjects With Type 1 Diabetes |
| 2010 | NCT01193387 | Comparison of Two Identical NN1250 Formulations in Healthy Volunteers |
| 2010 | NCT01076634 | Comparison of Two NN1250 Formulations in Subjects With Type 1 Diabetes |
| 2010 | NCT01855243 | Comparison on Efficacy and Safety of Three Inpatient Insulin Therapy in Type2 DM |
| 2010 | NCT01204294 | Comprehensive Add on Study in Japan |
| 2010 | NCT01089569 | Continuous Glucose Monitoring Evaluation of Exenatide Twice Daily Versus Insulin Glargine |
| 2010 | NCT01098461 | Dose Ranging Study of Albiglutide in Japanese Subjects |
| 2010 | NCT01068652 | Effect of Different Insulin Administrations, All in Combination With Metformin, on Glycaemic Control in Subjects With Type 2 Diabetes Inadequately Controlled by Oral Anti-diabetic Drugs |
| 2010 | NCT01147627 | Effect of Different Interventions on Glycemic Control and β-cell Function in Newly Diagnosed Type 2 Diabetic Patients |
| 2010 | NCT01951651 | Effect of Exenatide on Liver and Heart Fat and Inflammation |
| 2010 | NCT01432405 | Effect Of Exenatide Treatment on Liver Fat Content in Patients With Diabetes |
| 2010 | NCT01681693 | Effect of Genetic Variants in MATE1 and OCT3 on the Pharmacodynamics of Metformin in African Americans (#6113) |
| 2010 | NCT01051102 | Effect of NN5401 in Japanese Subjects With Type 1 Diabetes |
| 2010 | NCT01099137 | Effect of Vildagliptin in Type 2 Diabetes Treated With Sulphonylurea and Metformin |
| 2010 | NCT01822548 | Effect of Vildagliptin vs. Glibenclamide on Circulating Endothelial Progenitor Cell Number Type 2 Diabetes |
| 2010 | NCT01186003 | Effectiveness of Adding Subcutaneous Long-Acting Detemir to Insulin Drip Therapy Compared With Standard Insulin Drip Therapy |
| 2010 | NCT01153100 | Effectiveness of Adding Subcutaneous Long-acting Glargine to Insulin Drip Therapy Compared With Standard Insulin Drip Therapy |
| 2010 | NCT01175473 | Effects of Lixisenatide Compared to Liraglutide on the Postprandial Plasma Glucose in Patients With Type 2 Diabetes |
| 2010 | NCT01054300 | Effects of Once and Twice Daily Dosing Regimen of Ertugliflozin (PF-04971729, MK-8835) In Participants With Type 2 Diabetes (MK-8835-040) |
| 2010 | NCT01289119 | Efficacy and Safety of Alogliptin in Participants With Type 2 Diabetes |
| 2010 | NCT01165684 | Efficacy and Safety of Basal-bolus Therapy, Comparing Stepwise Addition of Insulin Aspart Versus Complete Basal-bolus Regimen |
| 2010 | NCT01106131 | Efficacy and Safety of CKD-501 Versus Pioglitazone When Added to Metformin |
| 2010 | NCT01196546 | Efficacy and Safety of Combination Therapy of Vildagliptin/Metformin in Patients in Type 2 Diabetes Mellitus (T2DM) |
| 2010 | NCT01164501 | Efficacy and Safety of Empagliflozin (BI 10773) in Patients With Type 2 Diabetes and Renal Impairment |
| 2010 | NCT01210001 | Efficacy and Safety of Empagliflozin (BI 10773) in Type 2 Diabetes Patients on a Background of Pioglitazone Alone or With Metformin |
| 2010 | NCT01177813 | Efficacy and Safety of Empagliflozin (BI 10773) Versus Placebo and Sitagliptin Over 24 Weeks in Patients With Type 2 Diabetes |
| 2010 | NCT01167881 | Efficacy and Safety of Empagliflozin (BI 10773) With Metformin in Patients With Type 2 Diabetes |
| 2010 | NCT01194830 | Efficacy and Safety of Linagliptin (BI 1356) in Black/African Americans With Type 2 Diabetes With a MTT Sub-study |
| 2010 | NCT01084005 | Efficacy and Safety of Linagliptin in Elderly Patients With Type 2 Diabetes |
| 2010 | NCT01169779 | Efficacy and Safety of Lixisenatide in Patients With Type 2 Diabetes Mellitus Insufficiently Controlled by Metformin |
| 2010 | NCT00993187 | Efficacy and Safety of Sitagliptin/Metformin Fixed-Dose Combination (FDC) Compared to Glimepiride in Participants With Type 2 Diabetes Mellitus (MK-0431A-202) |
| 2010 | NCT01214239 | Efficacy and Safety Study of Linagliptin (5 mg Administered Orally Once Daily) Over 24 Weeks, in Drug Naive or Previously Treated Type 2 Diabetic Patients With Insufficient Glycaemic Control |
| 2010 | NCT01215097 | Efficacy and Safety Study of Linagliptin (5 mg Administered Orally Once Daily) Over 24 Weeks in Type 2 Diabetic Patients With Insufficient Glycaemic Control Despite Metformin Therapy |
| 2010 | NCT01159600 | Efficacy and Safety Study With Empagliflozin (BI 10773) vs. Placebo as add-on to Metformin or Metformin Plus Sulfonylurea Over 24 Weeks in Patients With Type 2 Diabetes |
| 2010 | NCT01117350 | Efficacy Assessment of Insulin Glargine Versus LiraglutidE After Oral Agents Failure (EAGLE) |
| 2010 | NCT01137695 | Efficacy Study of High Dose Symlin to Treat Type 2 Diabetes Mellitus |
| 2010 | NCT01193218 | Empagliflozin (BI 10773) Dose Finder Study in Japanese Patients With Type 2 Diabetes Mellitus |
| 2010 | NCT01195454 | Euglycemic Clamp Dose-response Study Comparing a New Insulin Glargine Formulation With Lantus® |
| 2010 | NCT01147250 | Evaluation of Cardiovascular Outcomes in Patients With Type 2 Diabetes After Acute Coronary Syndrome During Treatment With AVE0010 (Lixisenatide) |
| 2010 | NCT01223339 | Evaluation of Pharmacokinetics, Safety, And Tolerability Of Ertugliflozin (PF-04971729, MK-8835) In Japanese And Western Healthy Participants (MK-8835-041) |
| 2010 | NCT01216618 | Evaluation of the Effect of the InsuPatch Device on Insulin Pharmacokinetics in Clamp Studies |
| 2010 | NCT01169818 | Evaluation of the Effectiveness and Safety of Physician Versus Patient-led of Insulin Glargine Initiation and Titration in Type 2 Diabetes Mellitus |
| 2010 | NCT01122979 | Evaluation of the Safety and Efficacy of Insulin Glargine + Glulisine or Insulin Regular + NPH Insulin (Isophane Insulin) Use in Type 2 Diabetes Mellitus Patients With Moderate Renal Failure. |
| 2010 | NCT01060059 | Exenatide and Basal Insulins Use in the Real Setting: an Observational Study in Patients With Type 2 Diabetes |
| 2010 | NCT01144338 | Exenatide Study of Cardiovascular Event Lowering Trial (EXSCEL): A Trial To Evaluate Cardiovascular Outcomes After Treatment With Exenatide Once Weekly In Patients With Type 2 Diabetes Mellitus |
| 2010 | NCT01215331 | Gestational Diabetes: Insulin or Oral Hypoglycemic Agents? (DG5) |
| 2010 | NCT01219582 | GLucobay M OBservation Study for Efficacy and Safety in Treatment of Type-2 Diabetes Patients (GLOBE) |
| 2010 | NCT01232491 | Impact of Dietary Intervention on Weight Change in Subjects With Type 2 Diabetes (DIET™) |
| 2010 | NCT01136798 | Impact of Exenatide on Sleep in Type 2 Diabetes |
| 2010 | NCT01208012 | Impact of Liraglutide on Endothelial Function and Microvascular Blood Flow in Type 2 Diabetes Mellitus |
| 2010 | NCT01144728 | Initiation and Titration of Amaryl (AMIT KZ) |
| 2010 | NCT01087567 | INSPIRE Diabetes Study: Basal Bolus Insulin as Primary Treatment of Type 2 Diabetes (INSPIRE) |
| 2010 | NCT01109316 | Insulin Lispro 6 Days Versus Insulin Aspart 6 Days in Pump Use |
| 2010 | NCT01134107 | Insulin Lispro 6 Days Versus Insulin Aspart 6 Days in Pump Use |
| 2010 | NCT01022658 | INSUlin Regimens and VASCular Functions |
| 2010 | NCT01121835 | Insulins Glargine and gluLisine strAtegy Versus Premixed Insulin strAteGy: a cOmparative Study |
| 2010 | NCT01203111 | Intensive Insulin Glulisine Therapy in Patients With Type 2 Diabetes Inadequately Controlled With Basal Insulin and Oral Glucose-lowering Drugs (CHANGING) |
| 2010 | NCT01082120 | Investigate the Effect of AZD1656 on the Pharmacokinetics of Pioglitazone and Vice Versa in Type 2 Diabetes Mellitus |
| 2010 | NCT01099618 | Ketosis-Prone Diabetes Mellitus (KPDM): Metformin Versus Sitagliptin Treatment |
| 2010 | NCT01179048 | Liraglutide Effect and Action in Diabetes: Evaluation of Cardiovascular Outcome Results |
| 2010 | NCT01237119 | Liraglutide Efficacy and Action in Non-Alcoholic Steatohepatitis |
| 2010 | NCT01159249 | Long-term Safety Study of Vildagliptin in Patients With Type 2 Diabetes |
| 2010 | NCT01250834 | LY2189265 and Atorvastatin Interaction Study |
| 2010 | NCT01521624 | Metformin Effects on Oxidative Stress Parameters in Newly Diagnosed Type 2 Diabetes Patients |
| 2010 | NCT01213901 | Optimizing Insulin Absorption and Insulin Injection Technique in Older Adults |
| 2010 | NCT01226043 | Patient Preference and Satisfaction With Insulin Glargine (Lantus) Solostar Pen vs Conventional Vial-Syringe Method of Lantus Injection Therapy in Patients With Type 2 Diabetes Mellitus |
| 2010 | NCT01828970 | Pilot Study of Glycemic Control in Diabetic Hemodialyzed Patients |
| 2010 | NCT01101867 | Prandial Insulin Dosing in Hospitalized Patients |
| 2010 | NCT01146678 | Relative Bioavailability and Activity of Different Formulations of Insulin Glargine and Lixisenatide in Patients With Diabetes Mellitus Type 1 |
| 2010 | NCT01127269 | Safety and Effectiveness Study of Insulin Glargine (LANTUS) Initiation and Titration in Patients With Type 2 Diabetes |
| 2010 | NCT01076088 | Safety and Efficacy of Co-Administration of Sitagliptin and Metformin in China (MK-0431-121) |
| 2010 | NCT01029886 | Safety and Efficacy of Exenatide Once Weekly Versus Liraglutide in Subjects With Type 2 Diabetes |
| 2010 | NCT01233622 | Safety and Efficacy of Galvus as add-on Therapy to Metformin Plus Glimepiride (Vildagliptin) |
| 2010 | NCT01087502 | Safety and Efficacy of Linagliptin in Type-2-diabetes Mellitus Patients With Moderate to Severe Renal Impairment |
| 2010 | NCT01189890 | Safety and Efficacy of Sitagliptin Compared With Glimepiride in Elderly Participants With Type 2 Diabetes Mellitus (MK-0431-251) |
| 2010 | NCT01194245 | Safety/Efficacy Study of Subcutaneously Injected Prandial Insulins Compared to Insulin Lispro Alone in Participants With Type 1 Diabetes Mellitus |
| 2010 | NCT01194258 | Safety/Efficacy Study of Subcutaneously Injected Prandial Insulins Compared to Insulin Lispro Alone in Patients With Type 2 Diabetes Mellitus |
| 2010 | NCT01128153 | Saxagliptin Triple Oral Therapy |
| 2010 | NCT02607410 | Sitagliptin (DPP-4 Inhibitor) and NPH Insulin in Patients With T2D |
| 2010 | NCT02024971 | Special Drug Use Surveillance of Pioglitazone/Metformin Hydrochloride Combination Tablets Survey on Long-term Use for Type 2 Diabetes Mellitus |
| 2010 | NCT01183104 | START-J: SiTAgliptin in eldeRly Trial in Japan (START-J) |
| 2010 | NCT01053728 | Study of How Single Rising Doses of SAR161271 Are Absorbed and Act in Patients With Type 1 Diabetes Mellitus (T1DM) |
| 2010 | NCT01059825 | Study Of Safety And Efficacy Of Ertugliflozin (PF-04971729, MK-8835) In Participants With Type 2 Diabetes (MK-8835-016) |
| 2010 | NCT01096667 | Study of Safety and Efficacy Of Ertugliflozin (PF-04971729, MK-8835) In Participants With Type 2 Diabetes And Hypertension (MK-8835-042) |
| 2010 | NCT01131182 | Study of Sitagliptin Treatment in Patients With Type 2 Diabetes During Ramadan (0431-263) |
| 2010 | NCT01120444 | Study on the Effects on Blood Glucose Following Intradermal and Subcutaneous Dosing of Insulin in Diabetic Patients |
| 2010 | NCT01154348 | Study to Assess Safety and Pharmacokinetics of Double-Blind S-707106 Alone and in Combination With Open-Label Metformin in Patients With Type 2 Diabetes Mellitus |
| 2010 | NCT01340768 | Study to Compare Sitagliptin Versus Sulfonylurea Treatment During Ramadan Fasting in Patients With Type 2 Diabetes (MK-0431-262) |
| 2010 | NCT01103414 | Study to Evaluate the Safety, Tolerability and Efficacy of Three Dose Levels of Mitoglitazone in Type 2 Diabetic Patients |
| 2010 | NCT01135992 | Switching From Insulin Glargine to Insulin Degludec in Subjects With Type 2 Diabetes Mellitus (BEGIN) |
| 2010 | NCT01106677 | The CANTATA-D Trial (CANagliflozin Treatment and Trial Analysis - DPP-4 Inhibitor Comparator Trial) |
| 2010 | NCT01137812 | The CANTATA-D2 Trial (CANagliflozin Treatment And Trial Analysis - DPP-4 Inhibitor Second Comparator Trial) |
| 2010 | NCT01081834 | The CANTATA-M (CANagliflozin Treatment and Trial Analysis - Monotherapy) Trial |
| 2010 | NCT01106690 | The CANTATA-MP Trial (CANagliflozin Treatment and Trial Analysis - Metformin and Pioglitazone) |
| 2010 | NCT01106625 | The CANTATA-MSU Trial (CANagliflozin Treatment And Trial Analysis - Metformin and SUlphonylurea) |
| 2010 | NCT01043510 | The Effect of NN1250 in Subjects With Type 2 Diabetes of Different Race and/or Ethnic Origin |
| 2010 | NCT01404676 | The Effect of Vildagliptin Based Treatment Versus Sulfonylurea on Glycemic Variability, Oxidative Stress, GLP-1, and Endothelial Function in Patients With Type 2 Diabetes |
| 2010 | NCT01420692 | The Effects of Insulin Detemir and Gliclazide-MR Treatments on Endothelial Functions in Patients With Type 2 Diabetes |
| 2010 | NCT01810952 | The Management of Glucocorticoid-Induced Hyperglycemia in Hospitalized Patients |
| 2010 | NCT01068860 | To Compare the Effect of a Subcutaneous Canakinumab Administration to Placebo in Patients With Impaired Glucose Tolerance or Patients With Type 2 Diabetes With Differing Baseline Diabetes Therapies |
| 2010 | NCT01110746 | To Evaluate the Effect on Post-prandial Glycemia Safety, and Tolerability of Viaject 7 vs. Lispro Insulin During Subcutaneous Insulin Pump Therapy |
| 2010 | NCT03179254 | Type 2 Diabetes and Ambulatory Surgery Patients (Diabetes) |
| 2010 | NCT01426802 | Vildagliptin 50 mg Twice Daily in Patients With Type 2 Diabetes Mellitus Inadequately Controlled With Metformin |
| 2010 | NCT01262586 | Vildagliptin Glycemic Profiles Assessment Using a Continuous Glucose Monitoring Device. |
| 2011 | NCT01370005 | 12 Week Efficacy and Safety Study of Empagliflozin (BI 10773) in Hypertensive Patients With Type 2 Diabetes Mellitus |
| 2011 | NCT01495013 | A Comparison of Atorvastatin and Glimepiride Fixed Dose Combination and Atorvastatin and Glimepiride Loose Combination in the Treatment of Patients With Type 2 Diabetes Mellitus |
| 2011 | NCT01374178 | A Comparison of LY2963016 to a Basal Insulin After a Single Dose in Healthy Subjects |
| 2011 | NCT01377155 | A Comparison of Two Initial Dosing Formulas |
| 2011 | NCT01381900 | A Efficacy, Safety, and Tolerability Study of Canagliflozin in Patients With Type 2 Diabetes Mellitus With Inadequate Glycemic Control on Metformin Alone or in Combination With a Sulphonylurea |
| 2011 | NCT01573949 | A Pilot Study: Metformin Therapy in Heart Failure Patients With Early Diabetes or at High Risk of Developing Diabetes (Pre-Diabetes) |
| 2011 | NCT01280695 | A Randomized, Double-Blind, Comparator- and Placebo-Controlled, Multiple-Dose Study to Evaluate the Safety, Tolerability and Efficacy of Three Dose Levels of MSDC-0602 in Type 2 Diabetic Patients |
| 2011 | NCT01175811 | A Study Comparing Insulin Intensification Therapies in Patients With Type 2 Diabetes Mellitus |
| 2011 | NCT01421147 | A Study in Adults With Type 1 Diabetes |
| 2011 | NCT01421459 | A Study in Adults With Type 2 Diabetes |
| 2011 | NCT01468987 | A Study in Participants With Type 2 Diabetes Mellitus |
| 2011 | NCT01435616 | A Study in Patients With Type 2 Diabetes Mellitus |
| 2011 | NCT01408888 | A Study of LY2189265 and Sitagliptin in Participants With Type 2 Diabetes |
| 2011 | NCT01468181 | A Study of LY2189265 in Japanese Participants With Type 2 Diabetes Mellitus |
| 2011 | NCT01436201 | A Study of the Effect of Dulaglutide on How Body Handles Digoxin in Healthy Participants |
| 2011 | NCT01458210 | A Study of the Effect of Dulaglutide on How the Body Handles Oral Contraceptive in Healthy Female Participants |
| 2011 | NCT01432938 | A Study of the Effect of Dulaglutide on the Action of Warfarin in Healthy Participants |
| 2011 | NCT01324388 | A Study of the Effect of LY2189265 on Two Blood Pressure Drugs |
| 2011 | NCT01483781 | A Study of the Effects of Canagliflozin on Plasma Volume in Patients With Type 2 Diabetes Mellitus |
| 2011 | NCT01472367 | A Study of the Safety and Efficacy of MK-0431A in Pediatric Participants With Type 2 Diabetes Mellitus (MK-0431A-170) |
| 2011 | NCT01273558 | A Study of Two Methods for Determining the Renal Threshold for Glucose in Patients With Type 2 Diabetes Mellitus |
| 2011 | NCT01505426 | A Study to Assess the Efficacy and Safety of ASP1941 in Combination With Metformin in Asian Diabetes Patients |
| 2011 | NCT01476345 | A Study to Compare the Pharmacokinetics and Pharmacodynamics of LY2963016 to Lantus in Healthy Participants |
| 2011 | NCT01381887 | A Study to Evaluate the Effect of JNJ-28431754 (Canagliflozin) on Post-Meal Glucose in Patients With Type 2 Diabetes Mellitus |
| 2011 | NCT01292993 | A Study to Evaluate the Interaction of LX4211 and Metformin in Healthy Subjects |
| 2011 | NCT01235741 | A Study To Examine The Efficacy And Safety Of Pramlintide+Metreleptin In Obese Subjects |
| 2011 | NCT01392573 | A Trial Comparing the Efficacy and Safety of Insulin Degludec/Liraglutide and Insulin Degludec in Subjects With Type 2 Diabetes |
| 2011 | NCT01469143 | A Trial Investigating the Pharmacokinetic Properties of Formulations of NN1218 in Subjects With Type 1 Diabetes |
| 2011 | NCT01296438 | A Trial Investigating the Pharmacokinetic Properties of NN1218 in Subjects With Diabetes Mellitus, Type 1 |
| 2011 | NCT01407289 | A Trial to Investigate Efficacy and Usability of Published Best Practice to Control Glycaemia |
| 2011 | NCT01455142 | A Trial to Test for Bioequivalence Between NN1045 and NN5401 in Subjects With Type 1 Diabetes |
| 2011 | NCT01792323 | Absorption of Insulin Following Subcutaneous Bolus Administration With Different Bolus Durations |
| 2011 | NCT01334125 | Adjunctive Metformin Therapy in Double Diabetes (AMTIDD) |
| 2011 | NCT01475734 | Albiglutide Glucose Clamp Study in Subjects With Type 2 Diabetes |
| 2011 | NCT01990300 | Alogliptin/Pioglitazone (Liovel) Combination Tablets Survey on Long-term Use in Patients With Type 2 Diabetes Mellitus |
| 2011 | NCT01340664 | An Efficacy, Safety, and Tolerability Study of Canagliflozin in the Treatment of Patients With Type 2 Diabetes Mellitus With Inadequate Glycemic Control on Metformin Monotherapy |
| 2011 | NCT01202474 | Apidra Children & Adolescents Study |
| 2011 | NCT01365091 | Bioequivalence Study of Fixed-dose Combinations and Coadministered Individual Tablets of Saxagliptin/Metformin-Brazil |
| 2011 | NCT01889095 | Biphasic Insulin Aspart Versus NPH Plus Regular Human Insulin in Type 2 Diabetic Patients |
| 2011 | NCT01333514 | Carbohydrate Consumption as a Factor in Aspart Dosing |
| 2011 | NCT01445951 | Clinical Trial Evaluating Technosphere® Insulin Versus Insulin Aspart in Subjects With Type 1 Diabetes Mellitus Over a 24-week Treatment Period |
| 2011 | NCT01445951 | Clinical Trial Evaluating Technosphere® Insulin Versus Insulin Aspart in Subjects With Type 1 Diabetes Mellitus Over a 24-week Treatment Period |
| 2011 | NCT01177384 | Clinical Trial to Evaluate the Safety and Efficacy of the Addition of Sitagliptin in Participants With Type 2 Diabetes Mellitus Receiving Acarbose Monotherapy (MK-0431-130) |
| 2011 | NCT01234649 | Combined Liraglutide and Metformin Therapy in Women With Previous Gestational Diabetes Mellitus (GDM) |
| 2011 | NCT01357603 | Comparative Glucose Clamp Study of Wockhardt's Recombinant Insulin Analog Glargine(Glaritus) With Lantus in T1DM |
| 2011 | NCT01269606 | Comparing Insulin Aspart With Fast-acting Insulin Human in Subjects With Type 1 Diabetes |
| 2011 | NCT01326026 | Comparing the Efficacy and Safety of NN1250 Once Daily When Titrated Using 2 Different Algorithms in Insulin Naive Subjects With Type 2 Diabetes Mellitus |
| 2011 | NCT01499082 | Comparison of a New Formulation of Insulin Glargine With Lantus in Patients With Type 2 Diabetes Mellitus on Basal Plus Mealtime Insulin |
| 2011 | NCT01499095 | Comparison of a New Formulation of Insulin Glargine With Lantus in Patients With Type 2 Diabetes on Basal Insulin With Oral Antidiabetic Therapy |
| 2011 | NCT01427920 | Comparison of Biphasic Insulin Aspart 30 Individually Adjusted by the Subject and the Trial Physician, Both Combined With Metformin in Subjects With Type 2 Diabetes (SimpleMix™) |
| 2011 | NCT01278160 | Comparison of Biphasic Insulin Aspart 30 Twice Daily With Two Different Initial Dosage Split Regimens in Subjects With Type 2 Diabetes: An Extension to Trial BIASP-3756 |
| 2011 | NCT01624116 | Comparison of Hypoglycaemic Regimens During Ramadan Fasting in Type 2 Diabetes |
| 2011 | NCT01593371 | Comparison of Metformin and Pioglitazone Effects on Adipokines Concentrations in Newly Diagnosed Type 2 DiabetesPatients |
| 2011 | NCT01272193 | Comparison of NN5401 With Insulin Glargine in Insulin Naive Subjects With Type 2 Diabetes |
| 2011 | NCT01451398 | Comparison of Technosphere® Insulin Versus Technosphere Powder (Placebo) in Insulin- Naive Subjects With Type 2 Diabetes Mellitus |
| 2011 | NCT01383356 | Comparison of the Bioavailability of Metformin Between Medium Dose Linagliptin/Metformin Tablets and Medium Dose Glucophage Tablet Given With Linagliptin Tablet |
| 2011 | NCT01388361 | Comparison of the Efficacy and Safety of Two Intensification Strategies in Subjects With Type 2 Diabetes Inadequately Controlled on Basal Insulin and Metformin |
| 2011 | NCT01215435 | Comparison of Two Biphasic Insulin Aspart 30 Treatment Regimens in Subjects With Type 2 Diabetes Not Achieving HbA1c Treatment Targets on OADs Alone |
| 2011 | NCT01364428 | Comparison of Two Insulin Degludec Formulations in Subjects With Type 2 Diabetes Mellitus |
| 2011 | NCT01281605 | Comparison of Two Titration Programs of Adding Insulin Detemir to OADs in Poorly Controlled Type 2 Diabetes |
| 2011 | NCT01296412 | Comparison of Two Treatment Regimens (Sitagliptin Versus Liraglutide) on Participants Who Failed to Achieve Good Glucose Control on Metformin Alone (MK-0431-403) |
| 2011 | NCT01832935 | Cost Effectiveness of Glargine Insulin Versus NPH Insulin |
| 2011 | NCT01131052 | Diabetes in the Elderly: Prospective Study |
| 2011 | NCT01378117 | Dipeptidyl Peptidase-4 Inhibitor (Sitagliptin) Therapy in the Inpatients With Type 2 Diabetes |
| 2011 | NCT01336023 | Dual Action of Liraglutide and Insulin Degludec in Type 2 Diabetes: A Trial Comparing the Efficacy and Safety of Insulin Degludec/Liraglutide, Insulin Degludec and Liraglutide in Subjects With Type 2 Diabetes |
| 2011 | NCT01621776 | Effect of Apidra Compared to Humalog in Decreasing Post-Prandial Hyperglycemia |
| 2011 | NCT03179280 | Effect of Dual-wave Insulin Bolus on Postprandial Glycaemia |
| 2011 | NCT01272219 | Effect of Liraglutide on Body Weight in Non-diabetic Obese Subjects or Overweight Subjects With Co-morbidities: SCALE - Obesity and Pre-diabetes |
| 2011 | NCT01272232 | Effect of Liraglutide on Body Weight in Overweight or Obese Subjects With Type 2 Diabetes: SCALE - Diabetes |
| 2011 | NCT01300260 | Effect of LY2189265 on Insulin Secretion in Response to Intravenous Glucose |
| 2011 | NCT01461577 | Effectiveness and Safety of Treatment of Insulin Glargine in Type 2 Diabetes Mellitus Following Glucagon-like Peptide-1 (GLP-1) Failure |
| 2011 | NCT01529541 | Efficacy and Safety of CWP-0403 Compared to Sitagliptin in Patients With Type 2 Diabetes Mellitus Insufficiently Controlled With Metformin Alone |
| 2011 | NCT01422876 | Efficacy and Safety of Empagliflozin (BI 10773) / Linagliptin (BI 1356) Fixed Dose Combination in Treatment Naive and Metformin Treated Type 2 Diabetes Patients |
| 2011 | NCT01365507 | Efficacy and Safety of Insulin Degludec/Insulin Aspart in Insulin-Naive Subjects With Type 2 Diabetes Using Two Dosing Regimens |
| 2011 | NCT01223131 | Efficacy and Safety of Insulin Glargine Versus. Neutral Protamine Hagedorn (NPH) Insulin in Children With Type 1 Diabetes Above 6 Years Old. |
| 2011 | NCT01476475 | Efficacy and Safety of Insulin Glargine/Lixisenatide Fixed Combination Versus Insulin Glargine Alone on Top of Metformin in Type 2 Diabetic Patients |
| 2011 | NCT01497522 | Efficacy and Safety of Vildagliptin as add-on Therapy to Metformin in Patients With Type 2 Diabetes |
| 2011 | NCT01413204 | Efficacy and Safety Study of TA-7284 in Patients With Type 2 Diabetes |
| 2011 | NCT01429506 | Efficacy of Laparoscopic Sleeve Gastrectomy and Intensive Medical Management in Obese Type 2 Diabetes |
| 2011 | NCT01368081 | Empagliflozin (BI 10773) Comprehensive add-on Study in Japanese Subjects With Type 2 Diabetes Mellitus |
| 2011 | NCT01457911 | Evaluation of Fixed Dose Combination of Glimepiride and Metformin in Chinese Type 2 Diabetes Patients Inadequately Controlled With Metformin |
| 2011 | NCT01392677 | Evaluation of Safety and Efficacy of Dapagliflozin in Subjects With Type 2 Diabetes Who Have Inadequate Glycaemic Control on Background Combination of Metformin and Sulfonylurea |
| 2011 | NCT01342484 | Finding a Safe and Effective Dose of Linagliptin in Pediatric Patients With Type 2 Diabetes |
| 2011 | NCT01757587 | Galvus (Vildagliptin) vs Placebo in Combination With Metformin and Insulin |
| 2011 | NCT01490762 | Healthy Normal Volunteers Looking at Exposure and Effects of Multiple Doses of Technosphere® Insulin (TI) Using the Gen2C Inhaler |
| 2011 | NCT01678235 | Insulin Glulisine and Aspart in Postprandial Glycemic Control After High-GI Meal in Children With Type 1 Diabetes Mellitus |
| 2011 | NCT01361594 | Intensive Insulin Therapy in Patients Undergoing Coronary Artery Bypass Surgery |
| 2011 | NCT01437592 | Investigating the Pharmacokinetic Properties of NN1250 in Healthy Chinese Subjects |
| 2011 | NCT01399346 | Investigation of the Impact of Different Application Volumes of Insulin Aspart in Subjects With Type 1 Diabetes |
| 2011 | NCT01242826 | Investigation of the Pharmacokinetic Properties of Biphasic Insulin Aspart 50 in Healthy Chinese Subjects |
| 2011 | NCT01269996 | JanUmet Before Insulin Lantus In Eastern Population Evaluation Program (JUBILEE) In Type 2 Diabetic Patients (JUBILEE) |
| 2011 | NCT01438814 | Linagliptin in Combination With Metformin in Treatment Naive Patients With Type 2 Diabetes Mellitus and Insufficient Glycaemic Control |
| 2011 | NCT01270789 | LIraglutide and Beta-cell RepAir (LIBRA) Study |
| 2011 | NCT01394341 | Liraglutide Treatment to Patients With Severe Renal Insufficiency |
| 2011 | NCT01387737 | Long-Term Safety Study of TA-7284 in Patients With Type 2 Diabetes Mellitus |
| 2011 | NCT01456130 | Long-term Study of Alogliptin as an Add-on to Rapid-Acting Insulin Secretagogues in Type 2 Diabetes |
| 2011 | NCT02098733 | Long-term Use of Sonias Combination Tablets in Patients With Type 2 Diabetes Mellitus |
| 2011 | NCT01354925 | Management of Type-2 Diabetic Patients Treated With Insulin During the Ramadan |
| 2011 | NCT01336322 | Metformin and Sitagliptin in Women With Previous Gestational Diabetes |
| 2011 | NCT01353391 | Metformin in Women With Type 2 Diabetes in Pregnancy Trial (MiTy) |
| 2011 | NCT01280409 | Metformin Postpartum for GDM RCT for Reduced Weight Retention |
| 2011 | NCT01335763 | Pharmacist Intervention for Glycemic Control in The Community |
| 2011 | NCT01334151 | Pharmacokinetic and Pharmacodynamic Properties of BIOD-105 and BIOD-107 Compared to Humalog® in Subjects With Type 1 Diabetes |
| 2011 | NCT01365117 | Pharmacokinetic Study in Healthy Volunteers |
| 2011 | NCT01391663 | Pharmacokinetics and Pharmacodynamics Study of Alogliptin in Healthy Korean Participants |
| 2011 | NCT01357889 | Pharmacokinetics/Pharmacodynamics of Albiglutide |
| 2011 | NCT02098746 | Pioglitazone/Glimepiride (Sonias) Combination Tablets Special Drug Use Surveillance Survey in Patients With Type 2 Diabetes Mellitus Who Respond Poorly to Pioglitazone |
| 2011 | NCT01434862 | Pramlintide Combined With Model Predictive Control Algorithm |
| 2011 | NCT01474018 | QR-Bromocriptine as an Adjunct to Insulin and Metformin in the Treatment of Type 2 Diabetes |
| 2011 | NCT01456650 | R230C and C230C Variants of ABCA1 and Glyburide Response |
| 2011 | NCT01526733 | Randomized, Double Blind, 2 Way Crossover Study of CSII With, Versus Without, Pretreatment With Human Hyaluronidase |
| 2011 | NCT01275131 | Randomized, Double-blind, Crossover, Pharmacokinetic (PK) and Glucodynamic (GD) Study of Continuous Subcutaneous Insulin Infusion (CSII) in Participants With Type 1 Diabetes Mellitus (T1DM) |
| 2011 | NCT01483560 | REducing With MetfOrmin Vascular Adverse Lesions in Type 1 Diabetes (REMOVAL) (REMOVAL) |
| 2011 | NCT01349855 | Repeated Dosing Study With a New Insulin Glargine Formulation and Lantus® in Patients With Type 1 Diabetes Mellitus |
| 2011 | NCT01306214 | Safety and Efficacy of BI 10773 as add-on to Insulin Regimen in Patients With Type 2 Diabetes Mellitus |
| 2011 | NCT01289990 | Safety and Efficacy of Empagliflozin (BI 10773) and Sitagliptin Versus Placebo Over 76 Weeks in Patients With Type 2 Diabetes |
| 2011 | NCT01474538 | Safety and Efficacy Study of Insulin Lispro Versus Insulin Aspart in Participants With Type 2 Diabetes on Insulin Pump Therapy |
| 2011 | NCT01319240 | Safety and Tolerability of Insulin Degludec/Liraglutide (A3) in Healthy Subjects |
| 2011 | NCT01473953 | Safety, Tolerability and Pharmacokinetics of Liraglutide-depot in Healthy Subjects |
| 2011 | NCT01240200 | Satisfaction of Treatment Among Elderly Patients With Insulin Therapy |
| 2011 | NCT01480843 | Simplified Insulin Protocol Using Lantus in Elderly |
| 2011 | NCT01493115 | Single Dose Study With a New Insulin Glargine Formulation and Lantus® in Japanese Patients With Type 1 Diabetes Mellitus |
| 2011 | NCT01334229 | Sitagliptin and Kinetics of Triglyceride-rich Lipoproteins Apolipoprotein B48 and B100 in Patients With Type 2 Diabetes |
| 2011 | NCT01817569 | Specific Clinical Experience Investigation for Long-term Use of Exenatide (Byetta Subcutaneous Injection) |
| 2011 | NCT01441869 | Study in Healthy Subjects to Measure Amount of Drug in Blood After Dosing With Different Saxagliptin / Metformin Produc |
| 2011 | NCT01654120 | Study of Effectiveness of Liraglutide Added to High Dose Insulin in Type II Diabetics |
| 2011 | NCT01399645 | Study of Liraglutide Versus Insulin on Liver Fat Fraction in Patients With Type 2 Diabetes |
| 2011 | NCT01509001 | Study of Metabolic and Haemodynamic Effects of Metformin and Glimepiride in Patients With Type 2 Diabetes Mellitus |
| 2011 | NCT01204775 | Study to Evaluate the Efficacy, Safety, Tolerability, and Pharmacokinetics of Saxagliptin as Monotherapy in Pediatric Patients With Type 2 Diabetes |
| 2011 | NCT01311076 | TAK-329 Glucose Clamp Study |
| 2011 | NCT01472640 | The Effect of Liraglutide on Left Ventricular Function in Chronic Heart Failure Patients With and Without Type 2 Diabetes Mellitus |
| 2011 | NCT01616784 | The REPOSE (Relative Effectiveness of Pumps Over MDI and Structured Education) Trial |
| 2011 | NCT01499108 | Time Course of the Blood Pressure Lowering Effect of Liraglutide Therapy in Type 2 Diabetes |
| 2011 | NCT01357252 | Vildagliptin add-on to Glimepiride Versus Placebo Added to Glimepiride in Type 2 Diabetes |
| 2012 | NCT01649297 | A 16 Weeks Study on Efficacy and Safety of Two Doses of Empagliflozin (BI 10773) (Once Daily Versus Twice Daily) in Patients With Type 2 Diabetes Mellitus and Preexisting Metformin Therapy |
| 2012 | NCT01563120 | A Comparison Between Two Oral Hypoglycemics - Metformin and Glybenclamide for the Treatment of Gestational Diabetes Mellitus |
| 2012 | NCT01686711 | A Double-blind, Parallel Group, Comparative Study of Coadministration AD-4833and SYR-322 |
| 2012 | NCT01434186 | A Multicenter, Randomized, Double-blind, Placebo-controlled Study to Evaluate the Efficacy and Safety of Saxagliptin (BMS-477118) in Combination With Metformin IR or Metformin XR in Pediatric Patients With Type 2 Diabetes Who Have Inadequate Glycemic Control on Metformin Alone |
| 2012 | NCT01718093 | A Pilot Study to Assess the Glucose Lowering Effect of Metformin and Sitagliptin in Adolescents With Type 1 Diabetes |
| 2012 | NCT01682902 | A Randomised Trial Evaluating Continuous Subcutaneous Infusion of Formulations of NN1218 and NovoLog® in Subjects With Type 1 Diabetes |
| 2012 | NCT01621178 | A Study Comparing Dulaglutide With Insulin Glargine on Glycemic Control in Participants With Type 2 Diabetes (T2D) and Moderate or Severe Chronic Kidney Disease (CKD) |
| 2012 | NCT01624259 | A Study Comparing the Effect of Dulaglutide With Liraglutide in Type 2 Diabetes |
| 2012 | NCT01644500 | A Study Comparing the Effects and Safety of Dulaglutide With Glimepiride in Type 2 Diabetes Mellitus (AWARD-CHN1) |
| 2012 | NCT01648582 | A Study Comparing the Effects and Safety of Dulaglutide With Insulin Glargine in Type 2 Diabetes Mellitus |
| 2012 | NCT01686620 | A Study Evaluating Safety and Efficacy of BIOD-123 Compared to Insulin Lispro (Humalog®) |
| 2012 | NCT01590771 | A Study in China Evaluating the Safety and Efficacy of Adding Sitagliptin to Stable Therapy With Sulfonylurea With or Without Metformin in Participants With Type 2 Diabetes Mellitus (T2DM) (MK-0431-253) |
| 2012 | NCT01590797 | A Study in China Evaluating the Safety and Efficacy of Adding Sitagliptin to Stable Therapy With Insulin With or Without Metformin in Participants With Type 2 Diabetes Mellitus (T2DM) (MK-0431-254) |
| 2012 | NCT01454284 | A Study in Participants With Type I Diabetes Mellitus |
| 2012 | NCT01691846 | A Study of Aleglitazar in Combination With Metformin in Patients With Type 2 Diabetes Mellitus Who Are Inadequately Controlled With Metformin Alone |
| 2012 | NCT01691989 | A Study of Aleglitazar in Combination With Metformin in Patients With Type 2 Diabetes Mellitus Who Are Inadequately Controlled With Sulfonylurea Alone or Sulfonylurea Plus Metformin Therapy |
| 2012 | NCT01667900 | A Study of Dulaglutide in Chinese Participants |
| 2012 | NCT01584232 | A Study of Dulaglutide in Japanese Participants With Type 2 Diabetes Mellitus |
| 2012 | NCT01582451 | A Study of LY2605541 in Participants With Type 2 Diabetes Mellitus |
| 2012 | NCT01654380 | A Study of LY2605541 Versus Insulin Glargine on Blood Sugar |
| 2012 | NCT01698775 | A Study of Omarigliptin (MK-3102) in Participants With Type 2 Diabetes Mellitus With Chronic Kidney Disease or Kidney Failure on Dialysis (MK-3102-019) |
| 2012 | NCT01729403 | A Study of The Effect of Aleglitazar on Insulin Sensitivity in Patients With Type 2 Diabetes Mellitus Who Are Inadequately Controlled With Metformin |
| 2012 | NCT01709305 | A Study of the Safety and Efficacy of Glimepiride, Gliclazide, Repaglinide or Acarbose When Added to Sitagliptin + Metformin Combination Therapy in Chinese Participants With Diabetes (MK-0431-313) |
| 2012 | NCT01682759 | A Study of the Safety and Efficacy of Omarigliptin (MK-3102) Compared With Glimepiride in Participants With Type 2 Diabetes Mellitus With Inadequate Glycemic Control on Metformin (MK-3102-016) |
| 2012 | NCT01557504 | A Study to Assess the Pharmacokinetics and the Ability for Pediatric Participants With Type 2 Diabetes to Swallow MK-0431A XR Tablets (MK-0431A-296) |
| 2012 | NCT01717313 | A Study to Assess the Safety and Efficacy of Omarigliptin (MK-3102) in Participants With Type 2 Diabetes Mellitus (T2DM) and Inadequate Glycemic Control (MK-3102-011) |
| 2012 | NCT01702298 | A Study to Assess the Safety and Tolerability of Sitagliptin/Simvastatin Fixed-dose Combination (FDC) in Participants With Type 2 Diabetes Mellitus With Inadequate Glycemic Control on MetforminMonotherapy (MK-0431D-312) |
| 2012 | NCT01600950 | A Study to Compare LY2963016 to Lantus After a Single Dose to Participants With Type 1 Diabetes Mellitus |
| 2012 | NCT03202875 | A Study to Compare Pharmacokinetics (PK) and Pharmacodynamics (PD) of SAR341402 to Insulin Aspart in Subjects With Type 1 Diabetes Mellitus |
| 2012 | NCT01524770 | A Study to Compare the Effect of Giving Dulaglutide Using an Auto-injector Versus a Manual Syringe |
| 2012 | NCT01512849 | A Study to Evaluate the PK/PD and Safety of TA-7284 in Patients With Type 2 Diabetes Mellitus Who Have Moderate Renal Impairment |
| 2012 | NCT01513590 | A Trial Comparing Efficacy and Safety of Insulin Degludec/Insulin Aspart and BIAsp 30 in Insulin naïve Subjects With Type 2 Diabetes (BOOST™) |
| 2012 | NCT01704417 | A Trial Comparing the Effect of Exercise on Blood Glucose in Subjects With Type 1 Diabetes, Who Are Treated With Either Insulin Degludec or Insulin Glargine |
| 2012 | NCT01569841 | A Trial Comparing the Efficacy of Insulin Degludec With Insulin Glargine on Glycaemic Control Using Continuous Glucose Monitoring in Patients With Type 1 Diabetes |
| 2012 | NCT01570751 | A Trial Comparing the Efficacy, Patient-reported Outcomes and Safety of Insulin Degludec 200 U/mL vs Insulin Glargine in Subjects With Type 2 Diabetes Mellitus Requiring High-dose Insulin |
| 2012 | NCT01623375 | A Trial Investigating the Absolute Bioavailability of Insulin Degludec in Healthy Subjects |
| 2012 | NCT01513473 | A Trial Investigating the Efficacy and Safety of Insulin Degludec in Children and Adolescents With Type 1 Diabetes Mellitus |
| 2012 | NCT01618188 | A Trial Investigating the Pharmacodynamic Properties of NN1218 in Subjects With Type 1 Diabetes |
| 2012 | NCT01590836 | A Trial Investigating the Pharmacodynamic Properties of NN5401 in Subjects With Type 1 Diabetes |
| 2012 | NCT01505673 | Adding Liraglutide to High Dose Insulin: Breaking the Cycle |
| 2012 | NCT01704261 | Addition of Omarigliptin (MK-3102) to Participants With Type 2 Diabetes Mellitus Who Have Inadequate Glycemic Control on Combination Therapy With Glimepiride and Metformin (MK-3102-022) |
| 2012 | NCT01677299 | Assessing the PK and Effect on Glucose and GI Hormone Concentrations of Metformin Delayed-Release in Subjects With T2DM |
| 2012 | NCT01632163 | Assessment of the Efficacy and Safety of Lixisenatide in Patients With Type 2 Diabetes Insufficiently Controlled With Basal Insulin +/- Metformin |
| 2012 | NCT01690091 | Cardioprotective and Metabolic Effects of Metformin in Patients With Heart Failure and Diabetes (CARMET) |
| 2012 | NCT01589653 | Comparing Patient-adjusted Versus Physician-adjusted Titration of BIAsp 30 Combined With Metformin in Type 2 DiabetesPatients |
| 2012 | NCT01658579 | Comparison of a New Formulation of Insulin Glargine With Lantus in Patients With Type 1 Diabetes Mellitus on Basal Plus Mealtime Insulin |
| 2012 | NCT01676220 | Comparison of a New Formulation of Insulin Glargine With Lantus in Patients With Type 2 Diabetes on Non-insulin Antidiabetic Therapy |
| 2012 | NCT01683266 | Comparison of a New Formulation of Insulin Glargine With Lantus in Patients With Type 1 Diabetes Mellitus |
| 2012 | NCT01689129 | Comparison of a New Formulation of Insulin Glargine With Lantus® in Japanese Patients With Type 1 Diabetes Mellitus |
| 2012 | NCT01689142 | Comparison of a New Formulation of Insulin Glargine With Lantus® Both in Combination With Oral Antihyperglycemic Drug(s) in Japanese Patients With Type 2 Diabetes Mellitus |
| 2012 | NCT01517412 | Comparison of Lixisenatide Injected Prior to the Main Meal of the Day Versus Prior to Breakfast in Type 2 Diabetic Patients on Metformin |
| 2012 | NCT01618214 | Comparison of Subject-driven Titration of Biphasic Insulin Aspart (BIAsp) 30 Twice Daily Versus Investigator-driven Titration of BIAsp 30 Twice Daily Both in Combination With Oral Antidiabetic Drugs in Subjects With Type 2 Diabetes |
| 2012 | NCT01544881 | Comparison of Technosphere Insulin Inhalation Powder & Subcutaneous Rapid-Acting Analog in Subjects With Type 1 Diabetes |
| 2012 | NCT01680341 | Comparison of the Efficacy and Safety of Two Different Dose Adjustment Regimens for Insulin Degludec/Insulin Aspart in Subjects With Type 2 Diabetes Mellitus Previously Treated With Insulin Glargine |
| 2012 | NCT01232946 | Cooperation of Insulin and GLP-1 on Myocardial Glucose Uptake |
| 2012 | NCT01510093 | Diurnal Variation of Exogenous Peptides (Endogenous Insulin Jurgita II) |
| 2012 | NCT01963130 | Does Vildagliptin Affect Portal Vein Pressure In Patients With Type 2 Diabetes Mellitus? A Cross Sectional Study |
| 2012 | NCT01632007 | Double-blind Comparative Study of SYR-472 |
| 2012 | NCT01662999 | Drug Interaction Study of Saxagliptin in Combination With Dapagliflozin in Healthy Participants |
| 2012 | NCT01679899 | Effect of Anti-diabetic Drugs on Bone Metabolism and Glycemic Variability (BoneGlyc) |
| 2012 | NCT01708044 | Effect of Different Fixed Pramlintide:Insulin Dose Ratios on Postprandial Glucose in T1DM |
| 2012 | NCT01557166 | Effect of Liraglutide in Obese Subjects With Moderate or Severe Obstructive Sleep Apnoea: SCALE - Sleep Apnoea |
| 2012 | NCT01461616 | Effect of NPH Insulin, Insulin Detemir and Insulin Glargine on GH-IGF-IGFBP Axis |
| 2012 | NCT01776788 | Effect of Short-Term Intensive Insulin Sequential Exenatide Therapy in Newly Diagnosed Type 2 Diabetic Patients |
| 2012 | NCT02099838 | Effectiveness and Safety of Adding Compound Preparation of Pioglitazone and Metformin for Type 2 Diabetic Patients |
| 2012 | NCT02006342 | Effectiveness of Subcutaneous Glargine On The Time To Closure of The Anion Gap in Patients Presenting to the Emergency Department With Diabetic Keto-acidosis |
| 2012 | NCT01614769 | Effects of Glimepiride on Recovery From Hypoglycemia in Participants With Type 2 Diabetes Mellitus (MK-0000-253) |
| 2012 | NCT01835678 | Effects of Linagliptin on Renal Endothelium Function in Patients With Type 2 Diabetes. |
| 2012 | NCT01664676 | Effects of Liraglutide on Kidney Function in Type 2 Diabetic Patients |
| 2012 | NCT01341717 | Effects of Sitagliptin on Type 2 Diabetes Mellitus Patients on Treatment With Metformin and Insulin |
| 2012 | NCT01459809 | Efficacy and Safety Comparison of Metformin/Glimepiride Combination Versus Each Compound Alone in New Diagnosed Type 2 Diabetes Patients (RECOMMEND) |
| 2012 | NCT01572740 | Efficacy and Safety of Liraglutide in Combination With Insulin Therapy Compared to Insulin Alone in Japanese Subjects With Type 2 Diabetes |
| 2012 | NCT01541215 | Efficacy and Safety of Liraglutide in Combination With Metformin Compared to Metformin Alone, in Children and Adolescents With Type 2 Diabetes (Ellipse™) |
| 2012 | NCT01620489 | Efficacy and Safety of Liraglutide Versus Placebo as add-on to Existing Diabetes Medication in Subjects With Type 2 Diabetes and Moderate Renal Impairment |
| 2012 | NCT01699932 | Efficacy and Safety of the Fixed Dose Combination of Glimepiride+Metformin in Type 2 Diabetic Patients Inadequately Controlled (LEGEND) |
| 2012 | NCT01582230 | Efficacy and Safety of Vildagliptin 50mg Bid as an add-on Therapy to Insulin With or Without Metformin, in Patients With Type 2 Diabetes Mellitus |
| 2012 | NCT01984489 | Efficacy and Safety Study of SHR117887 in Combination With Metformin in Patients With Type 2 Diabetes |
| 2012 | NCT01969318 | Efficacy and Safety Study of SP2086 in Combination With Metformin in Patients With Type 2 Diabetes |
| 2012 | NCT01541956 | Efficacy of VIldagliptin aS an Add-on Therapy to Metformin Compared to Metformin Up-TitratION in Chinese Patients With Type 2 Diabetes.(VISION) |
| 2012 | NCT01561976 | Evaluation of Food Effect on the Pharmacokinetics of Sustained Release Metformin in Healthy Indian Volunteers |
| 2012 | NCT01572649 | Evaluation of the Blood Levels of the Drug (Lixisenatide), the Plasma Glucose Levels and Safety in Paediatric and Adult Patients With Type 2 Diabetes |
| 2012 | NCT01234597 | Evaluation of the Prandial Treatment Adjustment Effect Via Continuous Glucose Monitoring on Type 2 Diabetes Mellitus (DM) Patients Uncontrolled With a Basal Insulin or Premix Once a Day |
| 2012 | NCT01524705 | FLuctuATion Reduction With inSULin and Glp-1 Added togetheR (FLAT-SUGAR) |
| 2012 | NCT01540396 | Gestational Diabetes Diagnostic Methods (GD2M) |
| 2012 | NCT01767389 | Glucagon-like Peptide (GLP) Utilization and Safety |
| 2012 | NCT01643382 | Hyperglycemia in Renal Transplantation |
| 2012 | NCT03507829 | Insulin Therapy for the Prevention of New Onset Diabetes After Transplantation Prospective Study in Non-Diabetic De Novo Kidney Transplant Recipients |
| 2012 | NCT01512979 | Linagliptin and Metformin Versus Linagliptin in Newly Diagnosed, Untreated Type 2 Diabetes |
| 2012 | NCT01425580 | Liraglutide and Heart Failure in Type 2 Diabetes |
| 2012 | NCT01550653 | Liraglutide Effects on Memory in Healthy Subjects |
| 2012 | NCT01722266 | Liraglutide in the Treatment of Type 1 Diabetes Mellitus |
| 2012 | NCT01675310 | Medical Nutrition Therapy Plus Transgestational Metformin For Preventing Gestational Diabetes In High Risk Mexican Women |
| 2012 | NCT01545388 | Metformin Add-on Regimen Comparison Study in Japanese Participants With Type 2 Diabetes Mellitus (MK-0431A-136) |
| 2012 | NCT02027103 | Metformin and Pioglitazone Effects on Fetuin-A and Osteoprotegrin Concentrations in Type 2 Diabetes Patients |
| 2012 | NCT01963663 | Metformin and Pioglitazone Effects on YKL-40 Concentrations in Type 2 Diabetes Patients |
| 2012 | NCT01915550 | Metformin as Adjuvant to Insulin Therapy in Insulin-resistant Diabetes Mellitus With Pregnancy |
| 2012 | NCT01517321 | MK-0431/ONO-5435 Phase III Clinical Trial-Rapid-acting Insulin Secretagogue Add-on Study in Patients With Type 2 Diabetes |
| 2012 | NCT01731431 | Multicenter Randomized Trial of Non-inferiority Between Glyburide and Insulin for the Treatment of Gestational Diabetes(INDAO) |
| 2012 | NCT01697592 | Omarigliptin (MK-3102) Clinical Trial - Add-on to Oral Antihyperglycemic Agent Study in Japanese Participants With Type 2 Diabetes Mellitus (MK-3102-015) |
| 2012 | NCT01703221 | Omarigliptin (MK-3102) Clinical Trial - Placebo- and Sitagliptin-Controlled Monotherapy Study in Japanese Patients With Type 2 Diabetes Mellitus (MK-3102-020) |
| 2012 | NCT01596504 | Pharmacodynamic Effects of Lixisenatide Compared to Liraglutide in Patients With Type 2 DiabetesNot Adequately Controlled With Insulin Glargine With or Without Metformin |
| 2012 | NCT01908894 | Pharmacokinetic and Pharmacodynamic Properties of BIOD-123 and BIOD-125 Compared to Humalog® in Subjects With Type 1 Diabetes Including Assessments of Injection Site Toleration |
| 2012 | NCT01702311 | Point-of-Care Glucose Testing and Insulin Supplementation |
| 2012 | NCT01531855 | Post-exercise Insulin Reductions in Type 1 Diabetes |
| 2012 | NCT01494987 | Ranolazine When Added to Glimepiride in Subjects With Type 2 Diabetes Mellitus |
| 2012 | NCT01617824 | Rapid Effects Linagliptin on Monocyte Polarization and Endothelial Progenitor Cells in Type 2 Diabetes |
| 2012 | NCT01581658 | Renal Impairment Study of Empagliflozin (BI10773) in Japanese Patients With Type 2 Diabetes |
| 2012 | NCT01676233 | Repeated Dose Study With a New Insulin Glargine Formulation and Lantus® on 24-hour Glucose Profile in Japanese Patients With Type 1 Diabetes Mellitus |
| 2012 | NCT01664624 | Roflumilast Plus Alogliptin Proof-of-Mechanism Study in Type2 Diabetes |
| 2012 | NCT01606007 | Safety and Efficacy of Combination Saxagliptin & Dapagliflozin Added to Metformin to Treat Subjects With Type 2 Diabetes |
| 2012 | NCT01646320 | Safety and Efficacy of Dapagliflozin in Triple Therapy to Treat Subjects With Type 2 Diabetes |
| 2012 | NCT01512108 | Safety and Efficacy of Liraglutide in Combination With an OAD in Subjects With Type 2 Diabetes Insufficiently Controlled on OAD Alone |
| 2012 | NCT01619059 | Safety and Efficacy of Saxagliptin in Triple Therapy to Treat Subjects With Type 2 Diabetes |
| 2012 | NCT01649466 | Safety and Efficacy of Vildagliptin Versus NPH Insulin add-on to Glimepiride in Type 2 Diabetes Mellitus Patients. (BENEFIT) |
| 2012 | NCT01719003 | Safety and Efficacy Study of Empagliflozin and Metformin for 24 Weeks in Treatment Naive Patients With Type 2 Diabetes |
| 2012 | NCT01699737 | Safety and Efficacy Study of JTT-851 in Patients With Type 2 Diabetes Mellitus |
| 2012 | NCT01546597 | Single Cohort 4-period Study to Assess Pharmacokinetics of Metformin Alone and in Combination With Ranolazine |
| 2012 | NCT01546558 | Single Cohort, 2-Period Study to Assess Pharmacokinetics of Metformin Alone and in Combination With Ranolazine 500 mg |
| 2012 | NCT01521962 | Study of Combination Therapy With SYR-322 |
| 2012 | NCT01462266 | Study of Sitagliptin for the Treatment of Type 2 Diabetes Mellitus With Inadequate Glycemic Control on Insulin (MK-0431-260) |
| 2012 | NCT01485614 | Study to Assess Safety & Efficacy of Sitagliptin as Initial Oral Therapy for Treatment of Type 2 Diabetes Mellitus in Pediatric Participants. (MK-0431-083) |
| 2012 | NCT01708902 | Study to Compare the Efficacy and Safety of Administration of the Fix Dose Combination of Linagliptin Plus Metformin in Drug naïve Type 2 Patients |
| 2012 | NCT01490918 | Study to Evaluate the Efficacy of Acarbose,Metformin,Sitagliptin Combination Treatment in DM Patients |
| 2012 | NCT01517373 | Study To Understand Efficacy And Safety Of Investigational Agent (PF-04937319) Compared To Approved Agent (Glimepiride) In Patients With Diabetes On Metformin |
| 2012 | NCT01496443 | TAK-875 Glimepiride Drug-Interaction Study |
| 2012 | NCT01664247 | The Effect of Insulin Degludec in Combination With Liraglutide and Metformin in Subjects With Type 2 Diabetes Qualifying for Treatment Intensification |
| 2012 | NCT01536665 | The Effect of Liraglutide Adjunct to Insulin on Glucagon Response to Hypoglycaemia in Subjects With Type 1 Diabetes |
| 2012 | NCT01617434 | The Effect of Liraglutide Versus Placebo When Added to Basal Insulin Analogues With or Without Metformin in Subjects With Type 2 Diabetes |
| 2012 | NCT01610934 | The Effects of GLP-1 in Maturity-Onset Diabetes of The Young (MODY) |
| 2012 | NCT01608724 | The Efficacy and Safety Study in Patients With Type 2 Diabetes Mellitus |
| 2012 | NCT01618162 | The Efficacy of Insulin Degludec/Liraglutide as add-on Therapy in Controlling Glycaemia in Adults With Type 2 Diabetes Inadequately Controlled on Sulphonylurea With or Without Metformin Therapy (DUAL™IV) |
| 2012 | NCT01676116 | The Efficacy of Insulin Degludec/Liraglutide in Controlling Glycaemia in Adults With Type 2 Diabetes Inadequately Controlled on GLP-1 Receptor Agonist and OAD Therapy |
| 2012 | NCT01677104 | The Microvascular Function of GLP-1 and Its Analogues |
| 2012 | NCT01519674 | Treatment Intensification With Biphasic Insulin Aspart 30 in Subjects With Type 2 Diabetes Inadequately Controlled on Sitagliptin and Metformin (SIT2MIX) |
| 2012 | NCT02292290 | Trial for People With Established Type 2 Diabetes During Ramadan (T4R) |
| 2012 | NCT01703286 | Trial to Assess the Influence of 4 Weeks' Treatment With Linagliptin as Compared to Glimepiride and Placebo on Endothelial Function in Patients With Type 2 Diabetes Using FMD (Flow-Mediated Vasodilation) |
| 2012 | NCT01528254 | VERIFY:A Study to Compare Combination Regimen With Vildagliptin & Metformin Versus Metformin in Treatment-naïve Patients With Type 2 Diabetes Mellitus |
| 2012 | NCT01518101 | Vildagliptin Versus Liraglutide - Patient Preference After Receiving Both Medications (PREFER) |
| 2013 | NCT01713530 | A 26-week Trial Comparing Efficacy and Safety of Insulin Degludec/Insulin Aspart BID and Insulin Degludec OD Plus Insulin Aspart in Subjects With Type 2 Diabetes Mellitus Treated With Basal Insulin in Need of Treatment Intensification With Mealtime Insulin |
| 2013 | NCT01755494 | A Bioequivalence Study of the Fixed Dose Combinations of Saxagliptin/Metformin XR Relative to Co-Administration |
| 2013 | NCT02853630 | A Clinical Trial to Study the Effects of Two Drugs, Vildagliptin and Metformin in Patients With Type 2 Diabetes Mellitus |
| 2013 | NCT02029924 | A Double-blinded, Randomised, Two -Period Crossover Euglycemic Clamp Trial Investigating the Pharmacokinetics, Glucodynamics and Safety of BioChaperone Insulin Lispro and Insulin Lispro (Humalog®) in Subjects With Type 1 Diabetes |
| 2013 | NCT01733758 | A Monotherapy Study to Evaluate the Efficacy and Safety of 2 Dose Levels of Albiglutide in Japanese Subjects With Type 2 Diabetes Mellitus (T2DM) |
| 2013 | NCT01780051 | A Pharmacokinetic Study to Compare Co-administration of Repaglinide and Metformin HCl to Administration of Combination Preparation of Those Two Components |
| 2013 | NCT01968044 | A Phase IIIb Study to Evaluate the Safety and Efficacy of Gemigliptin in Type 2 Diabetes Mellitus Patients With Moderate or Severe Renal Impairment(GUARD Study) |
| 2013 | NCT01814137 | A Randomised Trial Comparing Efficacy and Safety After Intensification With Either Insulin Aspart Once Daily as add-on or Changing to Basal Bolus Treatment With Insulin Degludec and Insulin Aspart in Subjects With Type 2 Diabetes Previously Treated With Insulin Degludec/Insulin Aspart Twice Daily |
| 2013 | NCT01789086 | A Randomised, Double-blind, Placebo-controlled Trial to Assess Safety, Tolerability and Pharmacokinetics of Liraglutide in Obese Adolescent Subjects Aged 12 to 17 Years |
| 2013 | NCT01903356 | A Regulatory Requirement Non Interventional Study to Monitor Safety and Effectiveness of Trajenta Duo in Type 2 Diabetes Patients in Korea |
| 2013 | NCT01894568 | A Study Comparing LY2605541 With Insulin Glargine as Basal Insulin Treatment |
| 2013 | NCT01871415 | A Study of Aleglitazar in Combination With Metformin in Patients With Type 2 Diabetes Mellitus Who Are Inadequately Controlled With Metformin Monotherapy |
| 2013 | NCT01925989 | A Study of How Insulin Peglispro (LY2605541) and Insulin Glargine Affect the Breakdown of Fat and Sugar in Type 1 Diabetics |
| 2013 | NCT01784211 | A Study of LY2605541 and Glargine and Exercise in Participants With Type 1 Diabetes |
| 2013 | NCT01769404 | A Study of LY2605541 and Glargine in Participants With Type 1 Diabetes |
| 2013 | NCT01771250 | A Study of LY2605541 and Glargine on Fats in Participants With Type 1 Diabetes |
| 2013 | NCT01986855 | A Study of the Efficacy and Safety of Ertugliflozin in Participants With Type 2 Diabetes Mellitus With Stage 3 Chronic Kidney Disease Who Have Inadequate Glycemic Control on Antihyperglycemic Therapy (MK-8835-001) |
| 2013 | NCT01958671 | A Study of the Efficacy and Safety of Ertugliflozin Monotherapy in the Treatment of Participants With Type 2 Diabetes Mellitus and Inadequate Glycemic Control Despite Diet and Exercise (MK-8835-003, VERTIS MONO) |
| 2013 | NCT01760447 | A Study of the Safety and Efficacy of MK-0431A XR in Pediatric Participants With Type 2 Diabetes Mellitus (MK-0431A-289) |
| 2013 | NCT02059161 | A Study of the Safety and Efficacy of MK-1293 Compared to Lantus in Participants With Type 1 Diabetes Mellitus (T1DM) (MK-1293-003) |
| 2013 | NCT01814748 | A Study of the Safety and Efficacy of Omarigliptin (MK-3102) in ≥18 and <45 Year-Old Participants With Type 2 Diabetes Mellitus and Inadequate Glycemic Control (MK-3102-028) |
| 2013 | NCT02273258 | A Study to Compare Pharmacokinetics and Pharmacodynamics of SAR342434 to Insulin Lispro in Subjects With Type 1 Diabetes |
| 2013 | NCT01877889 | A Study to Compare the Pharmacodynamics of Canagliflozin and Dapagliflozin in Healthy Volunteers |
| 2013 | NCT01777282 | A Study to Determine the Long Term Safety and Efficacy of Albiglutide in Combination With Oral Monotherapy Antihyperglycemic Medications in Japanese Patients With Type 2 Diabetes Mellitus |
| 2013 | NCT01455870 | A Study to Evaluate ITCA 650 Compared to Sitagliptin as add-on Therapy for the Treatment of Type 2 Diabetes |
| 2013 | NCT01809327 | A Study to Evaluate the Effectiveness, Safety, and Tolerability of Canagliflozin in Combination With Metformin in the Treatment of Patients With Type 2 Diabetes Mellitus With Inadequate Glycemic Control With Diet and Exercise |
| 2013 | NCT02033889 | A Study To Evaluate The Efficacy And Safety Of Ertugliflozin In Participants With Type 2 Diabetes Mellitus And Inadequate Glycemic Control On Metformin Monotherapy (MK-8835-007). |
| 2013 | NCT01959529 | A Trial Comparing Cardiovascular Safety of Insulin Degludec Versus Insulin Glargine in Subjects With Type 2 Diabetes at High Risk of Cardiovascular Events |
| 2013 | NCT01849289 | A Trial Comparing Efficacy and Safety of Insulin Degludec and Insulin Glargine in Insulin Naive Subjects With Type 2 Diabetes |
| 2013 | NCT01952145 | A Trial Comparing the Efficacy and Safety of Insulin Degludec/Liraglutide Versus Insulin Glargine in Subjects With Type 2 Diabetes Mellitus |
| 2013 | NCT01868542 | A Trial Comparing the Glycaemic Control of Levemir® Administered Once Daily According to Two Insulin Detemir Titration Algorithms After 20 Weeks in Subjects With Type 2 Diabetes Mellitus Inadequately Controlled on Metformin Treatment With or Without Other Anti-diabetic Drugs (OADs) |
| 2013 | NCT01999322 | A Trial Evaluating Compatibility and Safety of FIAsp and Insulin Aspart With an External Continuous Subcutaneous Insulin Infusion System in Adult Subjects With Type 1 Diabetes |
| 2013 | NCT01880736 | A Trial Investigating the Efficacy and Safety of Flexible vs. Fixed Dosing and Simple vs. Stepwise Titration With Once Daily (OD) Insulin Degludec in Inadequately Treated Subjects With Type 2 Diabetes |
| 2013 | NCT01835431 | A Trial Investigating the Efficacy and Safety of Insulin Degludec/Insulin Aspart Once Daily Plus Insulin Aspart for the Remaining Meals Versus Insulin Detemir Once or Twice Daily Plus Meal Time Insulin Aspart in Children and Adolescents With Type 1 Diabetes Mellitus |
| 2013 | NCT01773798 | A Trial Investigating the Pharmacodynamic and Pharmacokinetic Properties of Insulin Degludec/Insulin Aspart 15 in Subjects With Type 1 Diabetes |
| 2013 | NCT01924637 | A Trial Investigating the Pharmacokinetic and Pharmacodynamic Properties of FIAsp in Subjects With Type 1 Diabetes |
| 2013 | NCT01992588 | A Trial Investigating the Pharmacokinetic and Pharmacodynamic Properties of FIAsp When Administered as a Bolus in a Continuous Subcutaneous Infusion Regimen in Subjects With Type 1 Diabetes |
| 2013 | NCT02003677 | A Trial Investigating the Pharmacokinetic and Pharmacodynamic Properties of FIAsp in Geriatric and Younger Adult Subjects With Type 1 Diabetes |
| 2013 | NCT01934712 | A Trial Investigating the Pharmacokinetic Properties of FIAsp in Japanese Subjects With Type 1 Diabetes |
| 2013 | NCT01981031 | A Trial to Assess the Efficacy and Safety of BioChaperone Combo and Humalog Mix 25 in Subjects With Type 1 Diabetes |
| 2013 | NCT01916174 | A Trial to Demonstrate Bioequivalence Between Two Insulin Degludec/Liraglutide Formulations, B5 and V2 in Healthy Subjects |
| 2013 | NCT01892319 | An International Non-interventional Cohort Study to Evaluate the Safety of Treatment With Insulin Detemir in Pregnant Women With Diabetes Mellitus. Diabetes Pregnancy Registry |
| 2013 | NCT01937598 | Antidiabetic Effects of Adding a DPP-4 Inhibitor to Pre-Existing Treatment With an Incretin Mimetic in Patients With T2D |
| 2013 | NCT01835964 | Biobehavioral Mechanisms of Glucose Variability |
| 2013 | NCT01874080 | Bioequivalence Study |
| 2013 | NCT01755572 | Blood Pressure Outcomes With Liraglutide Therapy |
| 2013 | NCT01986881 | Cardiovascular Outcomes Following Ertugliflozin Treatment in Type 2 Diabetes Mellitus Participants With Vascular Disease, The VERTIS CV Study (MK-8835-004) |
| 2013 | NCT01662921 | Comparator Trial Using Insulin Glulisine vs. Insulin Lispro for Treatment of Gestational Diabetes |
| 2013 | NCT01902121 | Compare the Same Dosage of Insulin Using a Combination of Cartridges, 30 Units as 2 Cartridges vs. 1 Cartridge |
| 2013 | NCT01982604 | Comparison of 30 Units of TI (Technosphere® Insulin) Prepared With Insulin From Two Different Suppliers |
| 2013 | NCT03297879 | Comparison of Exenatide and Metformin Monotherapy in Overweight/Obese Patients With Newly Diagnosed Type 2 Diabetes |
| 2013 | NCT02219750 | Comparison of Premixed Insulin With Basal-plus Insulin in Type 2 Diabetes Patients |
| 2013 | NCT01652729 | Comparison Study of the Glycemic Effects, Safety, and Tolerability of Exenatide Once Weekly Suspension to Sitagliptin and Placebo in Subjects With Type 2 Diabetes Mellitus |
| 2013 | NCT01848990 | CONSISTENT 1: Metabolic and Safety Outcomes of Hylenex Recombinant (Hyaluronidase Human Injection) Preadministered at CSII Infusion Site in Participants With Type 1 Diabetes Mellitus (T1DM) |
| 2013 | NCT02359617 | Continuous Glucose Sensing at the Site of Subcutaneous Insulin Administration |
| 2013 | NCT01940302 | Dietary Supplement of LEHEL for the Patients With Type 2 Diabetes |
| 2013 | NCT02716610 | Dose-Response and Variability of Inhaled Insulin in Type 2 Diabetes |
| 2013 | NCT01766778 | Early add-on Vildagliptin in Patients With Type 2 Diabetes Inadequately Controlled by Metformin |
| 2013 | NCT01755468 | Early Intermittent Intensive Insulin Therapy as an Effective Treatment of Type 2 Diabetes (RESET-IT Pilot Study) |
| 2013 | NCT02680457 | Effect of Insulin Degludec Versus Insulin Glargine on Glycemic Variability in Patients With Type 2 Diabetes Mellitus |
| 2013 | NCT01761318 | Effect of Liraglutide on Cardiovascular Endpoints in Diabetes Mellitus Type 2 Patients |
| 2013 | NCT01948986 | Effect of Renal Impairment on the Pharmacokinetics, Pharmacodynamics, Safety and Tolerability of Ertugliflozin in Participants With Type 2 Diabetes Mellitus (MK-8835-009) |
| 2013 | NCT01890629 | Effects of Gemigliptin Versus Sitagliptin or Glimepiride With Metformin on Glucose Variability(MAGE, Glucose SD) Patients With Type 2 DM(STABLE Study) (STABLE) |
| 2013 | NCT01903070 | Effects of Linagliptin on Active GLP-1 Concentrations in Subjects With Renal Impairment |
| 2013 | NCT02350478 | Effects of Linagliptin on Endothelial Function |
| 2013 | NCT01729156 | Effects of Metformin on Hepatic FFA Metabolism |
| 2013 | NCT01812122 | Effects of Vildagliptine and Glimepiride on Glucose Variability |
| 2013 | NCT01890122 | Efficacy and Safety of Alogliptin and Metformin Fixed-Dose Combination in Participants With Type 2 Diabetes |
| 2013 | NCT02949193 | Efficacy and Safety of Evogliptin add-on to Metformin in Patients With type2 Diabetes |
| 2013 | NCT01652716 | Efficacy and Safety of Exenatide Once Weekly Suspension in Subjects With Type 2 Diabetes |
| 2013 | NCT01831765 | Efficacy and Safety of FIAsp Compared to Insulin Aspart Both in Combination With Insulin Detemir in Adults With Type 1 Diabetes |
| 2013 | NCT01819129 | Efficacy and Safety of FIAsp Compared to Insulin Aspart in Combination With Insulin Glargine and Metformin in Adults With Type 2 Diabetes (onset® 2) |
| 2013 | NCT01850615 | Efficacy and Safety of FIAsp in a Basal-bolus Regimen Versus Basal Insulin Therapy, Both in Combination With Metformin in Adult Subjects With Type 2 Diabetes (onset® 3) |
| 2013 | NCT03088670 | Efficacy and Safety of Gosogliptin as Monotherapy and in Combination With Metformin vs. Vildagliptin as Monotherapy and in Combination With Metformin in Drug-naive Type 2 Diabetic Patients. |
| 2013 | NCT02027753 | Efficacy and Safety of Insulin Glargine in Patients With Type 2 Diabetes With Inadequate Control on DPP-4 Inhibitor Therapy |
| 2013 | NCT01973231 | Efficacy and Safety of Liraglutide Versus Lixisenatide as add-on to Metformin in Subjects With Type 2 Diabetes (LIRA-LIXI™) |
| 2013 | NCT01768559 | Efficacy and Safety of Lixisenatide Versus Insulin Glulisine on Top of Insulin Glargine With or Without Metformin in Type 2 Diabetic Patients (GetGoal-Duo-2) |
| 2013 | NCT01798706 | Efficacy and Safety of Lixisenatide Versus Placebo on Top of Basal Insulin and/or Oral Antidiabetic Treatment in Older Type 2 Diabetic Patients (GetGoal-O) |
| 2013 | NCT01885208 | Efficacy and Safety of Semaglutide Once-weekly Versus Exenatide ER 2.0 mg Once-weekly as add-on to 1-2 Oral Antidiabetic Drugs (OADs) in Subjects With Type 2 Diabetes |
| 2013 | NCT01930188 | Efficacy and Safety of Semaglutide Once-weekly Versus Sitagliptin Once-daily as add-on to Metformin and/or TZD in Subjects With Type 2 Diabetes (SUSTAIN™ 2) |
| 2013 | NCT01907854 | Efficacy and Safety of Switching From Sitagliptin to Liraglutide in Subjects With Type 2 Diabetes Not Achieving Adequate Glycaemic Control on Sitagliptin and Metformin |
| 2013 | NCT01972724 | Efficacy of Pioglitazone in Participants With Inadequately Controlled Type 2 Diabetes Mellitus Treated With Stable Triple Oral Therapy (ADD) |
| 2013 | NCT01808690 | EMERALD: Effects of Metformin on Cardiovascular Function in Adolescents With Type 1 Diabetes (EMERALD) |
| 2013 | NCT01969747 | Empagliflozin add-on to Insulin in Type 1 Diabetes Mellitus Over 28 Days |
| 2013 | NCT01999218 | Ertugliflozin vs. Glimepiride in Type 2 Diabetes Mellitus (T2DM) Participants on Metformin (MK-8835-002) |
| 2013 | NCT01838083 | Euglycemic Clamp Study Comparing Two New Insulin Glargine Formulations in Subjects With Type 1 Diabetes Mellitus |
| 2013 | NCT01775579 | Evaluating a Pharmacokinetic Drug Interaction Between Metformin Hydrochloride and Rosuvastatin Calcium |
| 2013 | NCT01939496 | Evaluation of Blood Pressure Reduction, Safety, and Tolerability of Canagliflozin in Patients With Hypertension and Type 2 Diabetes Mellitus on Stable Doses of Anti-hyperglycemic and Anti-hypertensive Agents |
| 2013 | NCT02451917 | Glargine Versus NPH in Patients With Chronic Kidney Disease |
| 2013 | NCT01998113 | Glyburide and Metformin for the Treatment of Gestational Diabetes Mellitus. Systematic Review |
| 2013 | NCT01837680 | Glycemic Control Using Insulin Levemir Versus Insulin NPH for Diabetes in Pregnancy |
| 2013 | NCT01910194 | Impact of Combined of Lantus(Insulin Glargine) and Lyxumia (Lixisenatide) on Insulin Secretion and Gastric Emptying |
| 2013 | NCT01951339 | Impact of Sitagliptin on Cardiovascular Exercise Performance in Type 2 Diabetes |
| 2013 | NCT01892020 | Investigating Efficacy and Safety of Biphasic Insulin Aspart 50 Twice Daily Versus Biphasic Human Insulin 50 Twice Daily Both in Combination With Metformin in Chinese Subjects With Type 2 Diabetes Mellitus |
| 2013 | NCT01778049 | Linagliptin as Add on Therapy to Empagliflozin 10 mg or 25 mg With Background Metformin in Patient With Type 2 Diabetes |
| 2013 | NCT02540486 | Long Acting Insulin Glargine Titration Web Tool (LTHome) vs Enhanced Usual Therapy of Glargine Titration |
| 2013 | NCT01792518 | MARLINA - T2D : Efficacy, Safety & Modification of Albuminuria in Type 2 Diabetes Subjects With Renal Disease With LINAgliptin |
| 2013 | NCT01847144 | MASTERMIND - Understanding Individual Variation in Treatment Response in Type 2 Diabetes (Mastermind) |
| 2013 | NCT01881828 | Metformin Therapy for Overweight Adolescents With Type 1 Diabetes |
| 2013 | NCT01941199 | Pharmacokinetic/Pharmacodynamic Drug-drug Interaction of DA-1229 and Metformin After Oral Administration in Healthy Male Subjects |
| 2013 | NCT02713841 | Pharmacologic Response and Safety of Inhaled Insulin in Type 1 Diabetes |
| 2013 | NCT01864174 | Phase 4: Investigational Study to Evaluate Metformin XR Monotherapy Versus Metformin IR Monotherapy in Subjects With Type 2 Diabetes |
| 2013 | NCT01787396 | Phase III Trial to Evaluate the Efficacy and Safety of Initial Combination Therapy With Gemigliptin 50mg q.d and Metformin q.d |
| 2013 | NCT01947790 | Pioglitazone Regress Left Ventricular Mass in Type 2 Diabetes With Ischeamia Heart Disease |
| 2013 | NCT01947855 | Post Prandial Glucose (PPG) Study of Empagliflozin in Japanese Patients With Type 2 Diabetes Mellitus |
| 2013 | NCT01984372 | Post-marketing Surveillance (Special Use-results Surveillance) on Long-term Use With Tresiba¬Æ |
| 2013 | NCT01841359 | Pramlintide (Symlin) for the Treatment of Hypoglycemia Following Gastric Bypass Surgery |
| 2013 | NCT02131948 | Regulation of Endogenous Glucose Production by Brain Insulin Action |
| 2013 | NCT01975220 | Relative Bioavailability of 2 Fixed Dose Combinations of Empagliflozin/Metformin Compared With Single Tablets |
| 2013 | NCT01779375 | RISE Pediatric Medication Study (RISE Peds) |
| 2013 | NCT01734785 | Safety and Efficacy of the Combination of Empagliflozin and Linagliptin Compared to Linagliptin Alone Over 24 Weeks in Patients With Type 2 Diabetes |
| 2013 | NCT01582243 | Safety and Efficacy of Vildagliptin Plus Metformin (SPC) Treatment in Type 2 Diabetes Mellitus Patients |
| 2013 | NCT01940965 | Safety and Tolerability of Lixisenatide in Combination With Oral Anti-Diabetic Treatment in Patients With Type 2 Diabetes |
| 2013 | NCT01960179 | Safety And Tolerability Of Lixisenatide In Monotherapy In Patients With Type 2 Diabetes |
| 2013 | NCT02092597 | Safety Evaluation of Adverse Reactions in Diabetes (SAFEGUARD) |
| 2013 | NCT01845831 | Sitagliptin Therapy in Hospitalized Patients With Type 2 Diabetes |
| 2013 | NCT01769378 | Study of How Dulaglutide Compares to Placebo in Participants With Type 2 Diabetes Who Are Also on Sulfonylurea Therapy (AWARD-8) (AWARD-8) |
| 2013 | NCT01869621 | Study of Metformin Pharmacogenetics in Twins |
| 2013 | NCT01933672 | Study Of Two Dosing Regimens Of PF-04937319 Compared To An Approved Agent (Sitagliptin) In Patients With Type 2 Diabetes |
| 2013 | NCT01841697 | Study to Evaluate the Safety and Efficacy of the Addition of Omarigliptin (MK-3102) Compared With the Addition of Sitagliptin in Participants With Type 2 Diabetes Mellitus With Inadequate Glycemic Control on Metformin (MK-3102-026) |
| 2013 | NCT01929863 | Study to Investigate Safety, Tolerability, Pharmacokinetics and Pharmacodynamics of GSK2330672 in Type 2 DiabetesPatients Taking Metformin |
| 2013 | NCT01836523 | The Efficacy and Safety of Liraglutide as Adjunct Therapy to Insulin in the Treatment of Type 1 Diabetes |
| 2013 | NCT02008682 | The Efficacy and Safety of Liraglutide Compared to Sitagliptin, Both in Combination With Metformin in Chinese Subjects With Type 2 Diabetes |
| 2013 | NCT01535677 | To Compare the Similarity of a Combination Dapagliflozin/Metformin Tablet With the Two Drugs Administered Separately |
| 2013 | NCT01720446 | Trial to Evaluate Cardiovascular and Other Long-term Outcomes With Semaglutide in Subjects With Type 2 Diabetes |
| 2013 | NCT02012465 | Validation of Insulin Protocol for Glucocorticoid-induced Hyperglycemia in Diabetic Oncology Patients |
| 2013 | NCT01758380 | Vildagliptin Compared to Gliclazide as Dual Therapy With Metformin in Muslim Patients With Type 2 Diabetes Fasting During Ramadan (STEADFAST) |
| 2013 | NCT02145611 | Vildagliptin vs. Glibenclamide in Endothelial Function in Type 2 Diabetes and Hypertension |
| 2013 | NCT01871558 | Vildagliptin/Metformin in T2DM Patients Starting Basal Insulin (ADDONIS) |
| 2014 | NCT02182830 | 24 Week Efficacy and Safety Study of Empagliflozin (BI 10773) in Hypertensive Black/African American Patients With Type 2 Diabetes Mellitus and Hypertension |
| 2014 | NCT02243176 | 24-Week, Multicenter, Randomized, Parallel-group, Open-label, Active Controlled Phase IV Study to Assess the Efficacy, Safety and Tolerability of Saxagliptin Compared With Acarbose When in Combination With Metformin in Patients With T2D Inadequately Controlled With Metformin Monotherapy (SMART) |
| 2014 | NCT02065752 | A Bioequivalence Study of the Fixed Dose Combination Tablets of Canagliflozin and Metformin Extended Release (XR) With Respect to the Individual Components |
| 2014 | NCT02073227 | A Bioequivalence Study of the Fixed Dose Combination Tablets of Canagliflozin and Metformin Extended Release (XR) With Respect to the Individual Components |
| 2014 | NCT02077803 | A Bioequivalence Study of the Fixed Dose Combination Tablets of Canagliflozin and Metformin Extended Release (XR) With Respect to the Individual Components in Healthy Fed Participants |
| 2014 | NCT02298192 | A Clinical Trial Comparing Efficacy and Safety of Insulin Degludec/Liraglutide (IDegLira) in Subjects With Type 2 Diabetes Mellitus Using Two Different Titration Algorithms |
| 2014 | NCT02167061 | A Clinical Trial to Investigate Safety/Tolerability and Pharmacokinetics of DA-1229_01 Compared to Co-administration of Evogliptin 5 mg and Metformin XR 1000 mg, and to Evaluate the Effect of Food on the Pharmacokinetics of DA-1229_01 in Healthy Male Volunteers |
| 2014 | NCT02146651 | A Double-blinded, Randomised, Four-period Crossover Euglycemic Clamp Trial Investigating the Dose-response and Dose-exposure Relationship of BioChaperone Insulin Lispro in Three Different Doses in Subjects With Type 1 Diabetes |
| 2014 | NCT02213146 | A Double-blinded, Randomised, Three-period Crossover Euglycaemic Clamp Trial Investigating the Pharmacokinetics, Glucodynamics and Safety of BioChaperone Human Insulin, Human Insulin (Huminsulin® Normal) and Insulin Lispro (Humalog®) in Subjects With Type 1 Diabetes |
| 2014 | NCT02080377 | A Feasibility Study Looking at the Use of Glibenclamide and metfoRmin Versus stAndard Care in gEstational diabeteS(GRACES) |
| 2014 | NCT02411929 | A Phase 1 Study of Ertugliflozin in Healthy Male Participants (MK-8835-020) |
| 2014 | NCT02131246 | A Randomised Trial Investigating the Pharmacokinetic and Pharmacodynamic Properties of Faster-acting Insulin Aspart in Subjects With Type 1 Diabetes |
| 2014 | NCT02202161 | A Study Investigating Safety, Tolerability, Pharmacokinetics and Pharmacodynamics of GSK2330672 Administered With Metformin to Type 2 Diabetes Patients |
| 2014 | NCT02152371 | A Study of Dulaglutide (LY2189265) in Participants With Type II Diabetes |
| 2014 | NCT02139943 | A Study of Effects of Canagliflozin as Add-on Therapy to Insulin in the Treatment of Participants With Type 1 Diabetes Mellitus (T1DM) |
| 2014 | NCT02144948 | A Study of LY2189265 in Japanese Participants With Type 2 Diabetes Mellitus |
| 2014 | NCT02302716 | A Study of LY2963016 Compared to LANTUS® in Adult Participants With Type 2 Diabetes Mellitus |
| 2014 | NCT02205528 | A Study of Once-Daily NNC0090-2746 in Participants With Type 2 Diabetes Inadequately Controlled With Metformin |
| 2014 | NCT01989754 | A Study of the Effects of Canagliflozin (JNJ-28431754) on Renal Endpoints in Adult Participants With Type 2 Diabetes Mellitus |
| 2014 | NCT02152384 | A Study to Compare and Measure the Effects of Insulin Peglispro (LY2605541) and Glargine on Meal Time Insulin Requirements |
| 2014 | NCT02132637 | A Study to Compare the Effect of a Double Dose of Two Long-acting Insulin Therapies in Participants With Type 2 Diabetes |
| 2014 | NCT02197520 | A Study To Compare the Effects of Insulin Peglispro and Glargine on Insulin Sensitivity and Meal Time Insulin Requirements in Type 2 Diabetics |
| 2014 | NCT02025907 | A Study to Evaluate the Efficacy and Safety of the Addition of Canagliflozin in Participants With Type 2 Diabetes Mellitus With Inadequate Glycemic Control on Metformin and Sitagliptin |
| 2014 | NCT02000700 | A Study to Evaluate the Pharmacokinetics, Pharmacodynamics and Safety of Canagliflozin in Older Children and Adolescents With Type 2 Diabetes Mellitus |
| 2014 | NCT02059174 | A Study to Evaluate the Safety, Tolerability, Pharmacokinetics, and Pharmacodynamics of MK-1293 Compared With a Basal Insulin in Participants With Type 1 Diabetes (MK-1293-005) |
| 2014 | NCT02269735 | A Three-part Study to Evaluate the Safety, Pharmacokinetics and Pharmacodynamics of MK-2640 in Healthy Participants (Part I) and Participants With Type 1 Diabetes Mellitus (Parts II and III) (MK-2640-001) |
| 2014 | NCT02100475 | A Trial Comparing Sequential Addition of Insulin Aspart Versus Further Dose Increase With Insulin Degludec/Liraglutide in Subjects With Type 2 Diabetes Mellitus, Previously Treated With Insulin Degludec/Liraglutide and Metformin and in Need of Further Intensification (DUAL™) |
| 2014 | NCT02089451 | A Trial Comparing the Pharmacokinetic Properties of Faster-acting Insulin Aspart (FIAsp) After Different Injection Regions and Routes of Administration in Healthy Subjects |
| 2014 | NCT02030600 | A Trial Comparing the Safety and Efficacy of Insulin Degludec and Insulin Glargine, With or Without OADs in Subjects With Type 2 Diabetes |
| 2014 | NCT02034513 | A Trial Comparing the Safety and Efficacy of Insulin Degludec and Insulin Glargine, Both With Insulin Aspart as Mealtime Insulin in Subjects With Type 1 Diabetes |
| 2014 | NCT02207374 | A Trial Comparing the Safety and Efficacy of Semaglutide Once Weekly in Monotherapy or in Combination With One OAD in Japanese Subjects With Type 2 Diabetes |
| 2014 | NCT02254291 | A Trial Comparing the Safety and Efficacy of Semaglutide Once Weekly Versus Sitagliptin Once Daily in Japanese Subjects With Type 2 Diabetes |
| 2014 | NCT02033239 | A Trial Investigating the Pharmacodynamic Response of Faster Acting Insulin Aspart in Subjects With Type 1 Diabetes |
| 2014 | NCT02035371 | A Trial Investigating the Pharmacokinetic Properties of FIAsp in Children, Adolescents and Adults With Type 1 Diabetes |
| 2014 | NCT02148861 | A Trial Investigating the Safety, Tolerability, Pharmacokinetics and Pharmacodynamics of Subcutaneously Administered NNC0148-0287 (Insulin 287) in Subjects With Type 2 Diabetes |
| 2014 | NCT02221323 | A Trial to Compare the PK and PD of Insulin Lispro Administered Into Different Tissues in Subjects With Diabetes Mellitus Type 1 |
| 2014 | NCT02061969 | ADA Linagliptin in Long Term Care |
| 2014 | NCT02113332 | Addition of Liraglutide to Patients With Type 2 Diabetes Treated With Multiple Daily Insulin Injections |
| 2014 | NCT02435277 | An Extension Protocol to Evaluate Dose Comparisons of Leucine-Metformin Combinations in Type 2 Diabetic Patients |
| 2014 | NCT03068065 | Antidiabetic Effects on Intrahepatic Fat |
| 2014 | NCT02140645 | Ascertainment of EMR-based Clinical Covariates Among Patients Receiving Oral and Non-insulin Injected Hypoglycemic Therapy |
| 2014 | NCT02102932 | Bioavailability of Empagliflozin/Metformin Fixed Dose Combinations (FDCs) in Healthy Chinese Volunteers |
| 2014 | NCT02324309 | BIOD-531 vs. Humalog Mix 75/25 vs. Humulin R U-500 Post-Meal Glucose Control in Patients With Severe Insulin Resistance |
| 2014 | NCT02230995 | Bioequivalence of a Fixed Dose Combination Tablet of Empagliflozin/Metformin Extended Release Compared With Mono Compound Tablets in Healthy Subjects |
| 2014 | NCT02266472 | Bioequivalence of a Fixed Dose Combination Tablet of Empagliflozin/Metformin Extended Release Compared With Mono Compound Tablets in Healthy Male and Female |
| 2014 | NCT02223065 | Bioequivalence Study Coadministered to Healthy Subjects in the Fasted State |
| 2014 | NCT02060201 | Bioequivalence/Food Effect - Saxa/Dapa Dual Fixed Dose Combination (FDC) |
| 2014 | NCT02186483 | Clinical Trial to Investigate the Pharmacokinetics Drug Interaction Between Metformin and Rosuvastatin |
| 2014 | NCT02204839 | Combined Basal-bolus Insulin and Post-exercise Carbohydrate Feeding Strategy in T1DM |
| 2014 | NCT02068443 | Comparative Study to Evaluate Efficacy and Safety When Metformin Hydrochloride 500 mg Once Daily is Added on to SYR-322 25 mg in Type 2 Diabetic Patients With Inadequate Glycemic Control Despite Treatment With SYR-322 25 mg in Addition to Diet and Exercise Therapy |
| 2014 | NCT02212951 | Comparison of Postprandial Glucose Control Associated With BIOD-531 vs. Humalog Mix 75/25 vs. Humulin R U-500 |
| 2014 | NCT02273180 | Comparison of SAR342434 to Humalog as the Rapid Acting Insulin in Adult Patients With Type 1 Diabetes Mellitus Also Using Insulin Glargine |
| 2014 | NCT01991197 | Dipeptidyl Peptidase-4 Inhibition in Psoriasis Patients With Diabetes (DIP): A Randomized Clinical Trial. (DIP) |
| 2014 | NCT02151461 | Dose Comparisons of Leucine-Metformin Combinations on Blood Glucose Levels In Type 2 Diabetic Patients |
| 2014 | NCT02227212 | Ease of Use and Safety of the New U300 Pen Injector in Insulin-Naive Patients With T2DM |
| 2014 | NCT02113241 | Effect of Dapagliflozin Administration on Metabolic Syndrome, Insulin Sensitivity, and Insulin Secretion |
| 2014 | NCT02383238 | Effect of Dapagliflozin on Microvascular and Macrovascular Circulation and Total Body Sodium Content |
| 2014 | NCT02276274 | Effect of Food on the Pharmacokinetics of Single Oral Dose Administration of a Fixed-Dose Combination of SYR-322 and Metformin Hydrochloride in Healthy Adult Male Subjects |
| 2014 | NCT02200991 | Effect of Lixisenatide on Postprandial Plasma Glucose Compared to Sitagliptin in Combination With Insulin Glargine |
| 2014 | NCT02234440 | Effect of Metformin on Disease Progression in Patients With Cryptogenic Cirrhosis (NASH-related Cirrhosis) With Diabetes or Impaired Glucose Tolerance or Insulin Resistance |
| 2014 | NCT02226003 | Efficacy and Safety of Ertugliflozin (MK-8835/PF-04971729) With Sitagliptin in the Treatment of Participants With Type 2 Diabetes Mellitus (T2DM) With Inadequate Glycemic Control on Diet and Exercise (MK-8835-017) |
| 2014 | NCT01990469 | Efficacy and Safety of Gemigliptin 50mg qd Added in Patients With Type 2 Diabetes Inadequately Controlled on Glimepirideand Metformin |
| 2014 | NCT02058147 | Efficacy and Safety of Insulin Glargine/ Lixisenatide Fixed Ratio Combination Compared to Insulin Glargine Alone and Lixisenatide Alone on Top of Metformin in Patients With T2DM |
| 2014 | NCT01917656 | Efficacy and Safety of Liraglutide Versus Sulphonylurea Both in Combination With Metformin During Ramadan in Subjects With Type 2 Diabetes (LIRA-Ramadan™) |
| 2014 | NCT02128932 | Efficacy and Safety of Semaglutide Once Weekly Versus Insulin Glargine Once Daily as add-on to Metformin With or Without Sulphonylurea in Insulin-naïve Subjects With Type 2 Diabetes (SUSTAIN™ 4) |
| 2014 | NCT02305381 | Efficacy and Safety of Semaglutide Once-weekly Versus Placebo as add-on to Basal Insulin Alone or Basal Insulin in Combination With Metformin in Subjects With Type 2 Diabetes (SUSTAIN™ 5) |
| 2014 | NCT02054897 | Efficacy and Safety of Semaglutide Once-weekly Versus Placebo in Drug-Naive Subjects With Type 2 Diabetes |
| 2014 | NCT02058160 | Efficacy and Safety of the Insulin Glargine/Lixisenatide Fixed Ratio Combination Versus Insulin Glargine in Patients With Type 2 Diabetes (LixiLan-L) |
| 2014 | NCT02049814 | Efficacy and Safety of Voglibose Compared With Acarbose in Participants With Type 2 Diabetes |
| 2014 | NCT02220920 | Efficacy and Safety Study of Canagliflozin (TA-7284) in Combination With Insulin in Patients With Type 2 Diabetes Mellitus |
| 2014 | NCT02147925 | Efficacy Study of Liraglutide vs.Sitagliptin vs. Glargine on Liver Fat in T2DM Subjects |
| 2014 | NCT02026310 | Efficacy/Safety Study of Glimepiride to Type 2 Diabetes Patients Based on Metformin And Basal Insulin Treatment |
| 2014 | NCT02099110 | Ertugliflozin and Sitagliptin Co-administration Factorial Study (VERTIS FACTORAL, MK-8835-005) |
| 2014 | NCT02104804 | Evaluate the Efficacy and Safety of Saxagliptin Added to Insulin Monotherapy or to Insulin Combined With Metformin in Chinese Subjects With Type 2 Diabetes Who Have Inadequate Glycaemic Control |
| 2014 | NCT02273050 | Evaluate the Efficacy and Safety of Saxagliptin in Combination With Metformin IR Compared to Saxagliptin Monotherapy and to Metformin IR Monotherapy in Drug Naive Chinese Subjects With Type 2 Diabetes Who Have Inadequate Glycaemic Control |
| 2014 | NCT02313220 | Exploratory Study to Investigate the Effect of Dapagliflozin and Exenatide Combined on Body Weight |
| 2014 | NCT02168491 | Feasibility of Once/Daily Administered GLP/1 Receptoragonist (Lixisenatide) in Combination With Basal Insulin |
| 2014 | NCT02007278 | Glycemic Excursions in Type 2 Diabetic Patients With Vildagliptin and Metformin Versus Vildagliptin and Glimepiride (GLOBE) |
| 2014 | NCT02476760 | Incretin-based Drugs and Acute Pancreatitis |
| 2014 | NCT02475499 | Incretin-based Drugs and Pancreatic Cancer |
| 2014 | NCT02456428 | Incretin-based Drugs and the Risk of Heart Failure |
| 2014 | NCT02248454 | Insulin Bolus Required for High Fat Foods in Type 1 Diabetes |
| 2014 | NCT01947556 | Insulin by Jet-injection for Hyperglycemia in Diabetes |
| 2014 | NCT02045290 | Insulin Clamp Ancillary Study for Assessment of Insulin Resistance |
| 2014 | NCT02235961 | Investigate Safety, Tolerability and Pharmacokinetics for Single Doses of NNC9204-0530 Alone and in Combination With Liraglutide in Overweight to Obese But Otherwise Healthy Male Subjects |
| 2014 | NCT02207348 | Investigating Bioequivalence Between Single-dose Liraglutide Administered Subcutaneously With Two Different Pen-injectors |
| 2014 | NCT02240680 | Linagliptin as Add on to Basal Insulin in the Elderly |
| 2014 | NCT02004366 | Linagliptin Inpatient Trial |
| 2014 | NCT02049034 | Lixisenatide-The Effects on Glucose and Lipid Metabolism in Type 2 Diabetes |
| 2014 | NCT02227849 | Long-Term Safety Study of Canagliflozin (TA-7284) in Combination With GLP-1 Analogue in Patients With Type 2 Diabetes Mellitus |
| 2014 | NCT02622113 | Long-Term Safety Study of Canagliflozin (TA-7284) in Combination With Insulin in Patients With Type 2 Diabetes Mellitus |
| 2014 | NCT02220907 | Long-Term Safety Study of MT-2412 in Japanese Patients With Type 2 Diabetes |
| 2014 | NCT02252965 | Metformin Extended Release Versus Metformin Immediate Release in Subjects With Type 2 Diabetes (CONSENT) |
| 2014 | NCT01386671 | Metformin Glycinate on Metabolic Control and Inflammatory Mediators in Type 2 Diabetes (COMET) |
| 2014 | NCT02167620 | Metformin in Co-morbid Diabetes or Prediabetes and Serious Mental Illness |
| 2014 | NCT02039245 | Multiple Dose Pharmacokinetics of Canagliflozin/Metformin 150/1,000 mg Fixed Dose Combination |
| 2014 | NCT02227862 | Non-inferiority Study to Compare the Efficacy and Safety of Mylan's Insulin Glargine With Lantus® in Type 1 Diabetes Mellitus Patients (INSTRIDE 1) |
| 2014 | NCT02227875 | Non-inferiority Study to Compare the Efficacy and Safety of Mylan's Insulin Glargine With Lantus® in Type 2 Diabetes Mellitus Patients (INSTRIDE 2) |
| 2014 | NCT02276859 | Normal Versus Dual Wave Insulin Bolus for High-protein Food |
| 2014 | NCT02015299 | Off taRget Effects of Linagliptin monothErapy on Arterial Stiffness in Early Diabetes |
| 2014 | NCT02138097 | Oral and Non-insulin Injected Hypoglycemic Therapy Utilization Patterns |
| 2014 | NCT02036372 | Perioperative Insulin, GIK or GLP-1 Treatment in Diabetes Mellitus |
| 2014 | NCT02121483 | Pharmacokinetic Single Dose Trial of Empagliflozin in Children and Adolescents With Type 2 Diabetes Mellitus |
| 2014 | NCT02039258 | Pharmacokinetics of a Fixed Dose Combination of Canagliflozin/Metformin Coadministered With Food |
| 2014 | NCT03361878 | Pharmacokinetics of Metformin Intolerance (POMI) |
| 2014 | NCT02115347 | Pharmacokinetics, Safety, and Tolerability of Ertugliflozin (MK-8835/PF-04971729) in Participants With Hepatic Impairment and in Healthy Participants (MK-8835-014) |
| 2014 | NCT02325206 | Phase 1 Study to Explore the Safety and Pharmacokinetics of DAPAglifozin in Adolescents and Adults With Type 1 Diabetes |
| 2014 | NCT02343926 | Phase 3 Study to Compare the Efficacy and Safety of Gemigliptin and Vildagliptin as Add-on Therapy to Metformin in People With Type 2 Diabetes Inadequately Controlled With Metformin |
| 2014 | NCT02229383 | Phase III Study to Evaluate Safety and Efficacy of Added Exenatide Versus Placebo to Titrated Basal Insulin Glargine in Inadequately Controlled Patients With Type II Diabetes Mellitus |
| 2014 | NCT02328040 | Randomized Trial Comparing Sitagliptin to Placebo in Closed Loop |
| 2014 | NCT02106923 | Relative Bioavailability of 2 Fixed Dose Combinations of Empagliflozin/Metformin Extended Release (XR) Compared With Single Tablets |
| 2014 | NCT02106104 | Renal Effects of DPP-4 Inhibitor Linagliptin in Type 2 Diabetes (RENALIS) |
| 2014 | NCT02229227 | Safety and Efficacy of Albiglutide + Insulin Glargine Versus Insulin Lispro + Insulin Glargine Subjects With Type 2 Diabetes Mellitus |
| 2014 | NCT02036515 | Safety and Efficacy of Ertugliflozin in the Treatment of Participants With Type 2 Diabetes Mellitus Who Have Inadequate Glycemic Control on Metformin and Sitagliptin (MK-8835-006; VERTIS SITA2) |
| 2014 | NCT02182895 | Safety and Efficacy of Saxagliptin for Glycemic Control in Non-Critically Ill Hospitalized Patient |
| 2014 | NCT02793505 | Safety of Metformin in Pregnancy |
| 2014 | NCT02022007 | Saxagliptin + Metformin Compared to Saxagliptin or Metformin Monotherapy in PCOS Women With Impaired Glucose Homeostasis |
| 2014 | NCT02201199 | Single Dose Clamp Study To Compare Concentration/Time Profile And Metabolic Activity Profile Of 2 New Formulations Of Insulin Glargine With Lantus |
| 2014 | NCT02288273 | Study to Evaluate the Effect of BYDUREON on 24-hour Glucose Control in Metformin Treated Patients With Type 2 Diabetes. |
| 2014 | NCT02284893 | Study to Evaluate the Efficacy and Safety of Saxagliptin Co-administered With Dapagliflozin in Combination With Metformin Compared to Sitagliptin in Combination With Metformin in Adult Patients With Type 2 Diabetes Who Have Inadequate Glycemic Control on Metformin Therapy Alone |
| 2014 | NCT02201602 | Sulphonylurea Receptor Mutation and Responsiveness to Gliclazide - a Pilot Proof of Concept, Randomised Cross-over Study |
| 2014 | NCT02815787 | The Drug -Drug Interaction of SP2086 and Glyburide |
| 2014 | NCT02354027 | The Drug-drug Interaction of SHR3824 and Metformin |
| 2014 | NCT02798172 | The Effect of Alogliptin on Pulmonary Function in Obese Patients With Type 2 Diabetes Inadequately Controlled by MetforminMonotherapy |
| 2014 | NCT01966978 | The Effect of Simple Basal Insulin Titration, Metformin Plus Liraglutide for Type 2 Diabetes With Very Elevated HbA1c - The SIMPLE Study (SIMPLE) |
| 2014 | NCT02098395 | The Efficacy and Safety of Liraglutide Adjunct to Insulin Treatment in Type 1 Diabetes |
| 2014 | NCT02231021 | The Practical Evidence of Antidiabetic Combination Therapy in Korea (PEAK) |
| 2014 | NCT02059187 | The Safety and Efficacy of MK-1293 Versus Lantus in Participants With Type 2 Diabetes Mellitus (MK-1293-006) |
| 2014 | NCT02188186 | Therapeutic Efficacy of Triple Combination in Drug-naïve Korean Type 2 Diabetic Patients |
| 2014 | NCT02299388 | To Evaluate the Effect of Liraglutide on Ambulatory Blood Pressure-A Pilot Study |
| 2014 | NCT02009488 | Treatment Differences Between Canagliflozin and Placebo in Insulin Secretion in Subjects With Type 2 Diabetes Mellitus (T2DM) |
| 2014 | NCT02101229 | Validation of the Artificial Pancreas Diabeloop Algorithm in the Hospital |
| 2015 | NCT02967211 | A "Real World" Trial to Determine Efficacy and Health Outcomes of Toujeo Compared to "Standard of Care" Basal Insulin in Patients Already Using Basal Insulin |
| 2015 | NCT02967224 | A "Real World" Trial to Determine Efficacy and Health Outcomes of Toujeo Compared to "Standard of Care" Basal Insulins in Insulin Naïve Patients Initiating Insulin |
| 2015 | NCT02554877 | A 12-week Study To Evaluate PF-06291874 Once a Day in Adults With T2DM Inadequately Controlled On Metformin |
| 2015 | NCT02551874 | A 24-week Open-Label, Phase 3b Trial With a 28-week Extension to Evaluate the Efficacy and Safety of Saxagliptin Co-administered With Dapagliflozin Compared to Insulin Glargine in Subjects withType 2 Diabetes Who Have Glycemic Control on Metformin |
| 2015 | NCT02419612 | A 52-week International, Multicenter Trial With a Long -Term Extension to Evaluate Saxagliptin With Dapagliflozin in Combination With Metformin Compared to Glimepiride in Combination With Metformin in Type 2 Diabetes Who Have Inadequate Glycemic Control on Metformin Alone |
| 2015 | NCT02420262 | A Clinical Trial Comparing Efficacy and Safety of Insulin Degludec/Liraglutide (IDegLira) Versus Basal-bolus Therapy in Subjects With Type 2 Diabetes Mellitus |
| 2015 | NCT02375139 | A Clinical Trial to Investigate Safety/Tolerability and Pharmacokinetics of DA-1229_01(Evogliptin/Metformin XR 2.5/500 mg x 2 Tablets) Compared to Co-administration of Evogliptin 5 mg and Metformin XR 1000 mg in Healthy Male Volunteers |
| 2015 | NCT02325960 | A Comparison of Exenatide and Insulin Glargine |
| 2015 | NCT02117622 | A Non-interventional, Post Marketing Surveillance (PMS) Study of Tresiba® (Insulin Degludec) to Evaluate Long Term Safety and Efficacy in Patients With Diabetes Mellitus in Routine Clinical Practice in India |
| 2015 | NCT02496221 | A Study Evaluating the Effect of Albiglutide on Gallbladder Emptying in Healthy Subjects |
| 2015 | NCT02597049 | A Study of Dulaglutide (LY2189265) in Participants With Type 2 Diabetes Mellitus |
| 2015 | NCT02532855 | A Study to Assess the Addition of Sitagliptin to Metformin Compared With the Addition of Dapagliflozin to Metformin in Participants With Type 2 Diabetes Mellitus (T2DM) and Mild Renal Impairment Who Have Inadequate Glycemic Control on Metformin With or Without a Sulfonylurea (MK-0431-838) |
| 2015 | NCT02452632 | A Study to Assess the Efficacy and Safety of ASP1941 in Subjects With Type 2 Diabetes Mellitus Who Have Inadequate Glycemic Control on Metformin and Sitagliptin |
| 2015 | NCT02453685 | A Study to Compare Insulin Intensification of Biphasic Insulin Aspart 30 and Insulin Analogues (Insulin Glargine and Insulin Aspart) in Insulin Naive Type 2 Diabetic Patients |
| 2015 | NCT02630706 | A Study to Evaluate the Efficacy and Safety of Ertugliflozin in Asian Participants With Type 2 Diabetes and Inadequate Glycemic Control on Metformin Monotherapy (MK-8835-012) |
| 2015 | NCT02607306 | A Trial Comparing the Efficacy and Safety of Insulin Degludec/Liraglutide, Insulin Degludec and Liraglutide in Japanese Subjects With Type 2 Diabetes Mellitus |
| 2015 | NCT02612844 | A Trial Investigating the Safety, Tolerability, Pharmacokinetics and Pharmacodynamics of Subcutaneous NNC0143-0406 A 0.6 mmol/L in Subjects With Type 1 Diabetes |
| 2015 | NCT02514850 | A Trial to Compare the Pharmacodynamic and Pharmacokinetic Properties of Biochaperone® Combo With Humalog® Mix25 and With Simultaneous Injections of Humalog® and Lantus® in Subjects With Type 2 Diabetes |
| 2015 | NCT02594033 | A Trial to Investigate Different Needle Features Assessed by Comparing Insulin Aspart Pharmacokinetic Profiles |
| 2015 | NCT02597101 | Anti-Inflammatory Small Drug Adjunctive Therapy for Type 2 Diabetes |
| 2015 | NCT02545738 | Antiproteinuric Effects of Liraglutide Treatment |
| 2015 | NCT02603510 | Assessment of the Safety of SAR342434 and Humalog® When Administered as Continuous Subcutaneous Insulin Infusion |
| 2015 | NCT02545842 | Assessment Study of Three Different Fasting Plasma Glucose Targets in Chinese Patients With Type 2 Diabetes Mellitus (BEYOND III/FPG GOAL) |
| 2015 | NCT02344992 | Blood Glucose Control With BioChaperone Insulin Lispro Compared to Insulin Lispro (Humalog®) After Ingestion of a Standardized Meal |
| 2015 | NCT02987348 | Clinical Outcomes of Exenatide Versus Basal Insulin |
| 2015 | NCT02582242 | Comparing Efficacy and Safety of Thrice Daily Versus Twice Daily NovoMix® 30 (Biphasic Insulin Aspart 30) in Subjects With Type 2 Diabetes Inadequately Controlled With Basal Insulin |
| 2015 | NCT02536859 | Comparing Pharmacodynamic and Pharmacokinetic Properties of Insulin Degludec and Insulin Glargine 300 U/mL at Steady-state Conditions in Subjects With Type 1 Diabetes Mellitus |
| 2015 | NCT02683226 | Comparison of Alogliptin Versus Alogliptin and Pioglitazone on Insulin Resistance of Metformin Treated Women With PCOS |
| 2015 | NCT03226210 | Comparison of Efficacy and Safety of Prandilin and NovoRapid in Newly Diagnosed Type 2 Diabetes |
| 2015 | NCT02449603 | Comparison of Exenatide vs. Biphasic Insulin Aspart 30 on Glucose Variability in Type 2 Diabetes |
| 2015 | NCT02546401 | Comparison of Insulin's Injection Before or After the Meal in Type 1 Diabetic Patients Treated With Insulin Pump |
| 2015 | NCT02585674 | Comparison of MyStar DoseCoach to Routine Titration in Adult Patients With Type 2 Diabetes Mellitus Using Toujeo |
| 2015 | NCT02294474 | Comparison of SAR342434 to Humalog as the Rapid Acting Insulin in Adult Patients With Type 2 Diabetes Mellitus Also Using Insulin Glargine |
| 2015 | NCT02320721 | Comparison of the Safety and Efficacy of HOE901-U300 With Lantus in Older Patients With Type2 Diabetes Insufficiently Controlled on Their Current Antidiabetic Medications |
| 2015 | NCT02354222 | Confirmatory Study of MT-2412 in Japanese Patients With Type 2 Diabetes (Add-on Study of Teneligliptin) |
| 2015 | NCT02354235 | Confirmatory Study of MT-2412 in Japanese Patients With Type 2 Diabetes (Add-on Study of Canagliflozin) |
| 2015 | NCT02608177 | Continuous Glucose Monitoring to Assess Glycemia in Chronic Kidney Disease - Changing Glucose Management (CANDY-CANE) |
| 2015 | NCT02338193 | Dapagliflozin and Metformin,Alone and in Combination, in Overweight/Obese Prior GDM Women (DAPA-GDM) |
| 2015 | NCT02312063 | Dietary Impacts on Glucose-lowering Effects of Sitagliptin in Type 2 Diabetes (DIET) |
| 2015 | NCT02461589 | Dose-finding of Semaglutide Administered Subcutaneously Once Daily Versus Placebo and Liraglutide in Subjects With Type 2 Diabetes |
| 2015 | NCT02577003 | Double-blind Ipragliflozin Add-on Study in Japanese Participants With Type 2 Diabetes Mellitus Who Have Inadequate Glycemic Control on Sitagliptin (MK-0431J-843) |
| 2015 | NCT02577016 | Double-blind Sitagliptin Add-on Study in Japanese Participants With Type 2 Diabetes Mellitus Who Have Inadequate Glycemic Control on Ipragliflozin (MK-0431J-842) |
| 2015 | NCT02597400 | Drug-Drug Interaction Study of Glucokinase Activator HMS5552 and Metformin in T2DM |
| 2015 | NCT02500979 | Effect of a Fixed Pramlintide: Insulin Dose Ratio on Postprandial Glucose in Type 1 Diabetes Mellitus |
| 2015 | NCT02429258 | Effect of Dapagliflozin on 24-hour Blood Glucose in T2DM Patients Inadequately Controlled With Either Metformin Or Insulin |
| 2015 | NCT02610088 | Effect of Dapagliflozin on Vascular Functions in Patients With Type 2 Diabetes Compared to Gliclazide |
| 2015 | NCT02497313 | Effect of Metformin and Cholecystokinin-mediated Gallbladder Emptying on GLP-1 Secretion in Type 2 Diabetes |
| 2015 | NCT03509324 | Effectiveness of Glucose Control, Î² Cell Function in Response to Short-term Insulin Pump Therapy in Type 2 Diabetes |
| 2015 | NCT02426541 | Effects of Dapagliflozin 10 mg on Insulin Resistance in Patients With Type 2 Diabetes Mellitus |
| 2015 | NCT02401880 | Effects of Linagliptin in Addition to Empagliflozin on Islet Cell Physiology |
| 2015 | NCT02360254 | Effects of Shifting From Twice Daily Insulin Glargine or Detemir to Once Daily Insulin Degludec in Type 1 Diabetes |
| 2015 | NCT02467920 | Efficacy and Safety of Basal Insulin Glargine Combination With Exenatide Bid vs Aspart30 in T2DM |
| 2015 | NCT02471404 | Efficacy and Safety of Dapagliflozin and Dapagliflozin Plus Saxagliptin in Combination With Metformin in Type 2 Diabetes Patients Compared With Sulphonylurea |
| 2015 | NCT02280486 | Efficacy and Safety of Saxagliptin VS. Glimepiride in Chinese T2DM Patients Controlled Inadequately With Metformin (SPECIFY) |
| 2015 | NCT02318693 | Efficacy of Sitagliptin and Glibenclamide on the Glucose Variability in Japanese Participants With Type 2 Diabetes Mellitus (MK-0431-355) |
| 2015 | NCT02453555 | Empagliflozin Add on to Linagliptin Study in Japanese Patient With Type 2 Diabetes Mellitus |
| 2015 | NCT02380521 | Exenatide Once Weekly, Cardiovascular Risk and Type-2 Diabetes |
| 2015 | NCT02375828 | Glibentek in Patients With Neonatal Diabetes Secondary to Mutations in K+-ATP Channels (NEOGLI) |
| 2015 | NCT02192450 | Insulin Degludec and Symptomatic Nocturnal Hypoglycaemia |
| 2015 | NCT02408705 | Investigating the Effect of Liraglutide on the Endogenous Glucose Production During in Tye 1 Diabetes Subjects |
| 2015 | NCT02662114 | Investigating the Effectiveness of Tresiba® (Insulin Degludec) After Switching Basal Insulin in a Population With Type 1 or Type 2 Diabetes Mellitus |
| 2015 | NCT02568280 | Investigating the Postprandial Glucose Metabolism After Treatment With Faster-acting Insulin Aspart in Subjects With Type 1 Diabetes |
| 2015 | NCT02392117 | Investigating the Safety and Effectiveness of Insulin Degludec in a Real World Population With Type 1 and 2 Diabetes Mellitus |
| 2015 | NCT02453711 | Investigation of Safety and Efficacy of Once-daily Semaglutide in Obese Subjects Without Diabetes Mellitus |
| 2015 | NCT02564211 | Ipragliflozin Add-on Long-term Study in Japanese Participants With Type 2 Diabetes Mellitus on Sitagliptin (MK-0431J-849) |
| 2015 | NCT02489968 | Linagliptin as Add on Therapy to Empagliflozin 10 mg or 25 mg With Japanese Patients With Type 2 Diabetes Mellitus |
| 2015 | NCT02624817 | Long-Term Sulfonylurea Response in KCNJ11 Neonatal Diabetes (SuResponsKIR) |
| 2015 | NCT02485327 | PK and PD Within-Subject Variability of a Single Dose of Afrezza Inhaled Technosphere Insulin in Patients With Diabetes Mellitus Type 1 (T1DM) |
| 2015 | NCT02506647 | PK/PD Study of Gan & Lee's Insulin Glargine Injection in Comparison to Lantus in Type 1 Diabetes |
| 2015 | NCT02230618 | Post Marketing Surveillance (PMS) Study of Ryzodeg (Insulin Degludec/Insulin Aspart) in Patients With Diabetes Mellitus in Routine Clinical Practice in India |
| 2015 | NCT02514954 | Postprandial Blood Glucose Control With BioChaperone® Combo and Insulin Lispro (Humalog®) Mix 25 in People With Type 1 Diabetes Mellitus |
| 2015 | NCT02561130 | Remission Evaluation of a Metabolic Intervention in Type 2 Diabetes With Forxiga |
| 2015 | NCT02470637 | Single Dose Clamp Study to Evaluate Concentration-time Profile and Metabolic Activity of 3 Dose Levels of Afrezza and 3 Dose Levels of Insulin Lispro in Patients With Type 1 Diabetes Mellitus |
| 2015 | NCT02470637 | Single Dose Clamp Study to Evaluate Concentration-time Profile and Metabolic Activity of 3 Dose Levels of Afrezza and 3 Dose Levels of Insulin Lispro in Patients With Type 1 Diabetes Mellitus |
| 2015 | NCT03125694 | Sitagliptin vs. Pioglitazone as add-on Treatments in Patients With Type 2 Diabetes Uncontrolled on the Full-dose Metformin Plus Sulfonylurea |
| 2015 | NCT02434744 | Study of KD026 in Combination With Metformin in Subjects With Type 2 Diabetes Mellitus |
| 2015 | NCT02401243 | Study of Two Titration Algorithms With Insulin Glargine 300 Units/mL in Type 2 Diabetes Mellitus Patients |
| 2015 | NCT02636192 | Study on Incidence of Diabetic Ketoacidosis Among Participants With Type 2 Diabetes Mellitus Treated With Sodium-glucose Co-transporter 2 (SGLT2) Inhibitors or Other Antihyperglycemic Agents |
| 2015 | NCT02567994 | Tenelia Triple Combination Study (TETRIS) |
| 2015 | NCT02813863 | The Drug-drug Interaction of SP2086 and Metformin |
| 2015 | NCT02765399 | The Effect of Liraglutide Treatment on Postprandial Chylomicron and VLDL Kinetics, Liver Fat and de Novo Lipogenesis |
| 2015 | NCT02327039 | The Effects of Dapagliflozin on HDL Particles Subtypes and Reverse Cholesterol Transport in Type 2 Diabetic Patients |
| 2015 | NCT02606357 | Treatment of Type 2 Diabetes With Long Acting Basal Insulin in Jordan |
| 2015 | NCT02470039 | Trial to Compare NNC0123-0000-0338 in a Tablet Formulation and Insulin Glargine in Subjects With Type 2 Diabetes Currently Treated With Oral Antidiabetic Therapy |
| 2016 | NCT02647320 | 12-Week Study of DS-8500a in Subjects With Type 2 Diabetes Mellitus on Metformin |
| 2016 | NCT02501161 | A 104 Week Clinical Trial Comparing Long Term Glycaemic Control of Insulin Degludec/Liraglutide (IDegLira) Versus Insulin Glargine Therapy in Subjects With Type 2 Diabetes Mellitus |
| 2016 | NCT02533453 | A 12/24-weeks, Open, Multi-centre, Phase IV Study on Safety and Efficacy of 2mg Exenatide Once Weekly (Bydureon) in T2DM Patients. |
| 2016 | NCT02906917 | A 38 Week Trial Comparing Effect and Safety of Insulin Degludec/Insulin Aspart vs. Insulin Glargine Plus Insulin Aspart in Subjects With Type 2 Diabetes Treated With Basal Insulin With or Without Oral Antidiabetic Treatment in Need of Treatment Intensification |
| 2016 | NCT02773368 | A Clinical Trial Comparing Glycaemic Control and Safety of Insulin Degludec/Liraglutide (IDegLira) Versus Insulin Glargine (IGlar) as add-on Therapy to SGLT2i in Subjects With Type 2 Diabetes Mellitus |
| 2016 | NCT02911948 | A Double-blinded Trial Comparing the Efficacy and Safety of Insulin Degludec/Liraglutide and Insulin Degludec Both in Combination With Metformin in Japanese Subjects With Type 2 Diabetes Mellitus Inadequately Controlled With Basal or Pre-mix/Combination Insulin Therapy and Oral Anti-diabetic Drugs (DUAL™ II Japan) |
| 2016 | NCT02565862 | A Drug-drug Interaction Study Between Daclatasvir and Metformin (DATE-3) |
| 2016 | NCT02681094 | A Multi-Center, Randomized, Double-Blind, Phase III Trial to Evaluate the Safety and Efficacy of Saxagliptin Co-administered With Dapagliflozin Compared to Saxagliptin or Dapagliflozin All Given as add-on Therapy to Metformin in Subject With Type 2 Diabetes |
| 2016 | NCT02938572 | A Randomised Proof-of-Principle Trial Investigating Pharmacodynamics, Pharmacokinetics, and Safety of NNC0143-0406 in Subjects With Type 1 Diabetes Mellitus |
| 2016 | NCT02765204 | A Single-dose Cross-over Study to Assess Direct and Indirect Effects of Dapagliflozin on Pancreatic Alpha and Beta Cells in Patients With Type 2 Diabetes |
| 2016 | NCT02802514 | A Study Comparing the Effect of Albiglutide With Exenatide on Regional Brain Activity Related to Nausea in Healthy Subjects |
| 2016 | NCT02688933 | A Study Comparing the Efficacy and Safety of the Morning Injection of Toujeo Versus Lantus in Patients With Type 1 Diabetes Mellitus |
| 2016 | NCT02685345 | A Study of DS-8500a in Japanese Subjects With Type 2 Diabetes Mellitus Receiving Sitagliptin |
| 2016 | NCT02750410 | A Study of Dulaglutide in Japanese Participants With Type 2 Diabetes |
| 2016 | NCT02973100 | A Study of Investigational Dulaglutide Doses in Participants With Type 2 Diabetes on MetforminMonotherapy |
| 2016 | NCT02942914 | A Study of LY3209590 in Healthy Participants and Participants With Type 2 Diabetes |
| 2016 | NCT02759107 | A Study of LY3298176 in Healthy Participants and Participants With Type 2 Diabetes (T2DM) |
| 2016 | NCT03199261 | A Study of Pharmacokinetic Comparison of Two Recombinant Exendin-4 Formulations in Chinese Healthy Male Subjects |
| 2016 | NCT02754817 | A Study of the Effectiveness of Xultophy® (Insulin Degludec/Liraglutide) in an Adult Real-world Population With Type 2 Diabetes Mellitus |
| 2016 | NCT02791490 | A Study of the Safety and Efficacy of Sitagliptin Addition During Metformin Up-titration (MK-0431-848) |
| 2016 | NCT02794792 | A Study to Assess the Efficacy and Safety of Ipragliflozin in Subjects With Type 2 Diabetes Mellitus Who Have Inadequate Glycemic Control on Metformin (IMPRESSION) |
| 2016 | NCT02973321 | A Study to Assess the Safety and Efficacy of SAR425899 in Patients With Type 2 Diabetes Mellitus |
| 2016 | NCT02779413 | A Study to Evaluate Safety and Effectiveness in Patients of All Age Groups Excluding Less Than 12 Months Old Infants With Diabetes Mellitus in Routine Clinical Practice in Korea |
| 2016 | NCT02954692 | A Study to Evaluate the Effectiveness and Safety Initiation and Titration of Insulin Glargine (U300) in Insulin-naÕËve Patients With Type 2 Diabetes Mellitus (T2DM) Controlled on Oral Antidiabetic Drug Treatment in Turkey |
| 2016 | NCT02933853 | A Trial Investigating the Pharmacokinetic and Pharmacodynamic Properties of Faster-acting Insulin Aspart in Subjects With Type 2 Diabetes Mellitus |
| 2016 | NCT02844790 | A Trial Investigating the Pharmacokinetic Properties of Insulin Degludec/Insulin Aspart in Healthy Chinese Subjects |
| 2016 | NCT02964104 | A Trial Investigating the Safety, Tolerability, Pharmacokinetics (the Exposure of the Trial Drug in the Body) and Pharmacodynamics (the Effect of the Investigated Drug on the Body) of Insulin 287 in Subjects With Type 2 Diabetes |
| 2016 | NCT02696148 | A Trial to Assess Safety, Tolerability, Pharmacokinetics and Pharmacodynamics of Liraglutide in Obese Children Aged 7 to 11 Years |
| 2016 | NCT02717858 | A Trial to Assess the Effects of Liraglutide on Gallbladder Emptying in Overweight and Obese Subjects. |
| 2016 | NCT03611322 | A Trial to Compare Blood Concentration Levels of Semaglutide Following Subcutaneous Injections of Semaglutide 1 mg by 2 Different Devices (the DV3372 Device and by the PDS290 Semaglutide Pen-injector) |
| 2016 | NCT02915250 | A Trial to Compare Post Prandial Blood Glucose Control of BioChaperoneëå Combo With Humalogëå Mix25 and With Simultaneous Injections of Humalogëå and Lantusëå in Subjects With Type 2 Diabetes |
| 2016 | NCT03106870 | Adding Metformin to Insulin in Controlling Pregestational and Gestational Diabetes Mellitus |
| 2016 | NCT03310749 | An Assessment of Pharmacokinetic Gemigliptin and Metformin Interactions in Healthy Mexican Volunteers |
| 2016 | NCT02771093 | An Exploratory Study to Evaluate the Effects of Trelagliptin and Alogliptin by CGM on Glucose Variability for One Week With Type 2 Diabetes Mellitus |
| 2016 | NCT02737657 | An Observational Study to Evaluate Tolerability of Canagliflozin and Sulphonylurea in Type 2 Diabetes Patients During Ramadan |
| 2016 | NCT02722239 | An Open-label, Randomized, Crossover Study of Comparative Pharmacokinetics and Bioequivalence of Dapagliflozin + Metformin, 10 mg + 1000 mg Versus the Combined Use of Forxiga, 10 mg and Two Glucophage® Long, ER Tablets, 500 mg Co-administered to Healthy Volunteers Under Standard Fed Conditions |
| 2016 | NCT02758171 | Bioequivalence of a Fixed Dose Combination Tablet of Empagliflozin/Linagliptin Compared With the Free Combination of Empagliflozin Tablet and Linagliptin Tablet in Healthy Male and Female Subjects |
| 2016 | NCT02660736 | Bioequivalence Study of Two Albiglutide Drug Products in Healthy Adult Subjects |
| 2016 | NCT02824874 | CKD-396 Drug-drug Interaction Study(A) (CKD-396 DDI(A) P1) |
| 2016 | NCT02827890 | CKD-396 Drug-drug Interaction Study(B) (CKD-396 DDI(B) P1) |
| 2016 | NCT02648217 | Comparing Efficacy and Safety of Insulin Degludec/Insulin Aspart Twice Daily and Biphasic Insulin Aspart Twice Daily in Subjects With Type 2 Diabetes Mellitus Before, During and After Ramadan |
| 2016 | NCT02762578 | Comparing Efficacy and Safety of Insulin Degludec/Insulin Aspart and BIAsp 30 in Subjects With Type 2 Diabetes |
| 2016 | NCT03983551 | Comparing the Renal Effect of Dipeptidyl-peptidase 4 Inhibitors and Sulfonylureas |
| 2016 | NCT03320694 | Comparison of Metformin and Insulin for Management of Gestational Diabetes Mellitus |
| 2016 | NCT02836704 | Comparison of Standard vs Higher Starting Dose of Insulin Glargine in Chinese Patients With Type 2 Diabetes (Glargine Starting Dose) |
| 2016 | NCT02855684 | Comparison of the Efficacy and Safety of a New Formulation of Insulin Glargine With Lantus in Patients With Type 2 Diabetes Insufficiently Controlled With Non-insulin Antidiabetic Therapy |
| 2016 | NCT02735044 | Comparison of the Safety and Efficacy of HOE901-U300 With Lantus in Children and Adolescents With Type 1 Diabetes Mellitus |
| 2016 | NCT03074630 | Dapagliflozin and Cholesterol Metabolism in Type 2 Diabetes (DM2) |
| 2016 | NCT02805283 | Dapagliflozin Patient Satisfaction Survey |
| 2016 | NCT02843399 | Economic Outcomes of EQW (Exenatide Once Weekly) vs. IG (Insulin Glargine) in T2D Patients Who Are New to Injectable Therapy |
| 2016 | NCT02925559 | Effect of Anti-diabetic Drugs on Glycemic Variability (EFFORT) |
| 2016 | NCT02673138 | Effect of Canagliflozin in T1DM (Type 1 Diabetes Melitus) After Interruption of Continuous Subcutaneous Insulin Infusion |
| 2016 | NCT02700334 | Effect of Dapagliflozin on Insulin Secretion and Insulin Sensitivity in Patients With Prediabetes |
| 2016 | NCT02964572 | Effect of Sodium Glucose Co-transporter 2 Inhibitor on Inflammatory Cytokine in Type 2 Diabetes |
| 2016 | NCT02745470 | Effects of a GLP-1 Receptor Agonist on Functional Activation and Connectivity of the Brain |
| 2016 | NCT02752113 | Effects of Empagliflozin + Linagliptin vs Metformin + Insulin Glargine on Renal and Vascular Changes in Type 2 Diabetes(ELMI) |
| 2016 | NCT02875821 | Effects of Ipragliflozin on Excessive Fat in Type 2 Diabetes Patients With Non-alcoholic Fatty Liver Disease Treated With Metformin and Pioglitazone |
| 2016 | NCT03089333 | Effects of SGLT2 Inhibitor on Hemodynamic Parameters in Resistant Hypertensive Subjects |
| 2016 | NCT02777073 | Effects of Single Doses of Liraglutide and Dapagliflozin on Hyperglycemia and Ketogenesis in Type 1 Diabetes |
| 2016 | NCT02607865 | Efficacy and Long-term Safety of Oral Semaglutide Versus Sitagliptin in Subjects With Type 2 Diabetes |
| 2016 | NCT02825251 | Efficacy and Safety of Continuous Subcutaneous Insulin Infusion of Faster-acting Insulin Aspart Compared to NovoRapid® in Adults With Type 1 Diabetes |
| 2016 | NCT02500706 | Efficacy and Safety of Faster-acting Insulin Aspart Compared to NovoRapid® Both in Combination With Insulin Degludec in Adults With Type 1 Diabetes. |
| 2016 | NCT02670915 | Efficacy and Safety of Faster-acting Insulin Aspart Compared to NovoRapid® Both in Combination With Insulin Degludec in Children and Adolescents With Type 1 Diabetes |
| 2016 | NCT02752412 | Efficacy and Safety of LixiLan Versus Insulin Glargine Alone Both With Metformin in Japanese With Type 2 Diabetes Mellitus Inadequately Controlled on Basal Insulin and Oral Antidiabetic Drugs (LIXILAN JP-L) |
| 2016 | NCT02849080 | Efficacy and Safety of Oral Semaglutide Using a Flexible Dose Adjustment Based on Clinical Evaluation Versus Sitagliptin in Subjects With Type 2 Diabetes Mellitus. (PIONEER 7) |
| 2016 | NCT02863328 | Efficacy and Safety of Oral Semaglutide Versus Empagliflozin in Subjects With Type 2 Diabetes Mellitus |
| 2016 | NCT02863419 | Efficacy and Safety of Oral Semaglutide Versus Liraglutide and Versus Placebo in Subjects With Type 2 Diabetes Mellitus |
| 2016 | NCT02827708 | Efficacy and Safety of Oral Semaglutide Versus Placebo in Subjects With Type 2 Diabetes and Moderate Renal Impairment |
| 2016 | NCT02906930 | Efficacy and Safety of Oral Semaglutide Versus Placebo in Subjects With Type 2 Diabetes Mellitus Treated With Diet and Exercise Only |
| 2016 | NCT02648204 | Efficacy and Safety of Semaglutide Versus Dulaglutide as add-on to Metformin in Subjects With Type 2 Diabetes. (SUSTAIN 7) |
| 2016 | NCT02926950 | Efficacy and Safety of Sotagliflozin Versus Placebo in Patients With Type 2 Diabetes Mellitus on Background of Metformin |
| 2016 | NCT02924064 | Efficacy and Safety of Teneligliptin in Combination With Metformin in Chinese Patients With Type 2 Diabetes Mellitus |
| 2016 | NCT02749890 | Efficacy and Safety of the Insulin Glargine/Lixisenatide Fixed Ratio Combination (LixiLan) to Lixisenatide on Top of Oral Anti-diabetic Drugs (OADs) With Type 2 Diabetes in Japan |
| 2016 | NCT02752828 | Efficacy and Safety of the Insulin Glargine/Lixisenatide Fixed Ratio Combination (LixiLan) to Insulin Glargine Alone on Top of Oral Anti-diabetic Drugs (OADs) With Type 2 Diabetes in Japan |
| 2016 | NCT02787551 | Efficacy and Safety of the Insulin Glargine/Lixisenatide Fixed Ratio Combination (FRC) Versus GLP-1 Receptor Agonist in Patients With Type 2 Diabetes, With a FRC Extension Period (LixiLan-G) |
| 2016 | NCT02738151 | Efficacy and Safety of Toujeoëå Versus Tresibaëå in Insulin-Naive Patients With Type 2 Diabetes Mellitus Inadequately Controlled With Oral Antihyperglycemic Drug(s) ë± GLP-1 Receptor Agonist |
| 2016 | NCT02730377 | Efficacy in Controlling Glycaemia With Victoza (Liraglutide) as add-on to Metformin vs. OADs as add-on to Metformin After up to 104 Weeks of Treatment in Subjects With Type 2 Diabetes |
| 2016 | NCT02702011 | Empa Add on to Insulin in Japanese Patient With Type 1 Diabetes Mellitus |
| 2016 | NCT02613897 | ESR-15-11293 - Saxa/Dapa, Safety and Efficacy Study |
| 2016 | NCT02967237 | Evaluation of Toujeo Insulin in Type 2 Diabetes Patients Inadequately Control With Their Basal Insulin Treatment |
| 2016 | NCT02750930 | Extension to Study 200952 to Evaluate the Long-term Safety, Tolerability and Pharmacodynamics of Albiglutide Liquid Drug Product in Type 2 Diabetes Mellitus Subjects |
| 2016 | NCT02564926 | Foxiga Korea Local Phase 4 Study (BEYOND) |
| 2016 | NCT02895672 | GLP-1/Basal Insulin Combination Therapy |
| 2016 | NCT02899949 | Health Outcomes of Patients With Type 2 Diabetes Treated With Dapagliflozin in Conjunction With Insulin |
| 2016 | NCT02488057 | Improving Beta Cell Function in Mexican American Women With Prediabetes |
| 2016 | NCT02706119 | Insulin in Total Parenteral Nutrition |
| 2016 | NCT02956044 | Interaction of Bexagliflozin With Metformin, Glimepiride and Sitagliptin |
| 2016 | NCT02870231 | Investigating Safety, Tolerability, PK and PD for Multiple Doses of NNC9204-0530 in Combination With Liraglutide in Male and Female Subjects Being Overweight or With Obesity |
| 2016 | NCT02897349 | Linagliptin Add-on to Insulin Background Therapy |
| 2016 | NCT02756832 | Local, Multicenter, Observational, Non-Interventional Prospective Study of Alogliptin Benzoate in Participants With Diabetes Mellitus Type 2 |
| 2016 | NCT02830048 | Low dosE GlibENclamide in Diabetes Part A (LEGEND-A) |
| 2016 | NCT03017352 | Meal-time Administration of Exenatide for Glycaemic Control in Type 1 Diabetic Cases |
| 2016 | NCT03039075 | Metformin SR Tablet (DuLeNing) and Glucophage in Patients With Type 2 Diabetes (CQM-2016) |
| 2016 | NCT02827903 | Metformin/Rosuvastatin Combination Therapy With in Patients With Type 2 Diabetes and Dyslipidemia |
| 2016 | NCT02871882 | Ox Bile- Conjugated Bile Acids Sodium in Type II Diabetes Mellitus |
| 2016 | NCT02753803 | Pharmacokinetic/Pharmacodynamic Drug-drug Interaction of Evogliptin 5 mg and Pioglitazone 30 mg |
| 2016 | NCT02954822 | Pharmacokinetic/Pharmacodynamic Drug-drug Interaction of Evogliptin 5mg and Glimepiride 4mg |
| 2016 | NCT02508168 | Phase 1 Bioavailability Study of SYR-322MET |
| 2016 | NCT02974504 | Phase IV Clinical Trial to Investigate the Effect on Blood Glucose of Evogliptin in Patients With Type 2 Diabetes(EVERGREEN) |
| 2016 | NCT02821052 | Post-marketing Surveillance (Special Use-results Surveillance) on Long-term Use With Ryzodeg® |
| 2016 | NCT02713477 | Postprandial Glucodynamic Response to Insulin Glargine/Lixisenatide Fixed Ratio Combination in Japanese Patients With Type 2 Diabetes Mellitus |
| 2016 | NCT02738879 | Randomized Sitagliptin Withdrawal Study (MK-0431-845) |
| 2016 | NCT02805361 | Real World Assessment of Clinical Outcome Changes -Including Month of Ramadan-for Dapagliflozin in Management of Type II Diabetes Mellitus |
| 2016 | NCT02821910 | Relative Bioavailability of 2 Fixed Dose Combinations of Empagliflozin/Linagliptin/Metformin Extended Release Compared With Single Tablets |
| 2016 | NCT02623998 | Remission Evaluation of a Metabolic Intervention in Type 2 Diabetes With Sitagliptin (REMIT-Sita) |
| 2016 | NCT02682563 | Renoprotective Effects of Dapagliflozin in Type 2 Diabetes (RED) |
| 2016 | NCT02769481 | Safety and Efficacy of Bexagliflozin Compared to Glimepiride as Add-on Therapy to Metformin in Type 2 Diabetes Subjects |
| 2016 | NCT02683746 | Safety and Efficacy Study of Albiglutide Liquid Drug Product in Type 2 Diabetes Mellitus |
| 2016 | NCT02941367 | Safety Assessment of Lyxumia (Lixisenatide) and Sulfonylurea as Add-on Treatment to Basal Insulin in Uncontrolled Patients With Type 2 Diabetes Mellitus Who Elect to Fast During Ramadan |
| 2016 | NCT02556918 | Sitagliptin for Hyperglycemia in Patients With T2DM Undergoing Cardiac Surgery |
| 2016 | NCT03122041 | Sitagliptin Improved Beta Cell Function and Prevented a Conversion Rate to Impaired Glucose Tolerance and Type 2 Diabetes in Metformin Intolerant Obese Women With Polycystic Ovary Syndrome |
| 2016 | NCT02857764 | Sodium-glucose Co-transporter 2 (SGLT2) Inhibitor Risk of Below-Knee Lower Extremity Amputation: A Retrospective Cohort Study Using a Large Claims Database in the United States |
| 2016 | NCT02794155 | Study of HDV Insulin Versus Insulin in Type 1 Diabetes Subjects (ISLE-1) |
| 2016 | NCT02765347 | The Effects of Metformin on Glycemic Control and Insulin Sensitivity in Adolescents With T1DM |
| 2016 | NCT02951260 | The Effects of Metformin on Self-selected Exercise Intensity, Physical Fitness and Exercise-induced AMPK-activation |
| 2016 | NCT02695810 | The PRE-D Trial: Effect of Dapagliflozin, Metformin and Physical Activity in Pre-diabetes |
| 2016 | NCT02831361 | Trial to Evaluate the Efficacy and Safety of Gemigliptin Compared With Placebo Added on Insulin Alone or on Insulin in Combination With Metformin in Type 2 DM (ZEUS II Study) |
| 2016 | NCT02681497 | Use of Canagliflozin in Conjunction With Insulin in a Real-world Setting |
| 2016 | NCT02833415 | Visceral Adiposity and Diabetes: Translating Form to Function Using Imaging |
| 2017 | NCT03350191 | A Clinical Study to Investigate if SAR425899 Binds to the Liver and Pancreas in Overweight to Obese Type 2 Diabetes Mellitus Patients |
| 2017 | NCT03152552 | A Dose Finding Study to Assess the Effect of LIK066 Compared to Placebo or Empagliflozin in Patients With Type 2 Diabetes Mellitus and Heart Failure |
| 2017 | NCT02966626 | A Real World Experience of Dapagliflozin in Type 2 Diabetes |
| 2017 | NCT03215498 | A Research Study of How Faster-acting Insulin Aspart Moves Into, Through, and Out of the Body and How it Works in the Body When Given Through an Insulin Pump to People With Type 1 Diabetes |
| 2017 | NCT03115099 | A Study of LY3325656 in Healthy Participants and Participants With Type 2 Diabetes |
| 2017 | NCT03214380 | A Study of LY900014 Compared to Insulin Lispro in Participants With Type 2 Diabetes |
| 2017 | NCT03214367 | A Study of LY900014 in Participants With Type 1 Diabetes (PRONTO-T1D) |
| 2017 | NCT03315780 | A Study of the Glucodynamic Effects of Dulaglutide (LY2189265) in Japanese Participants With Type 2 Diabetes |
| 2017 | NCT03131687 | A Study of Tirzepatide (LY3298176) in Participants With Type 2 Diabetes Mellitus |
| 2017 | NCT02910518 | A Study to Demonstrate Bioequivalence Between Insulin Glulisine U300 and Insulin Glulisine U100 After a Single Subcutaneous Dose Using the Euglycemic Clamp Technique, in Patients With Type 1 Diabetes Mellitus |
| 2017 | NCT03169959 | A Study to Evaluate the Food Effect on Drug Availability, Pharmacokinetic (PK) Properties, Safety and Tolerability of Two Different Dose Combination Therapy of Saxagliptin/Dapagliflozin/Metformin Extended-release (XR) Against Individual Component Co-administration. |
| 2017 | NCT03175120 | A Trial Comparing Insulin Degludec/Liraglutide and Insulin Degludec in Combination With Metformin in Chinese Subjects With Type 2 Diabetes Mellitus Inadequately Controlled With Basal Insulin Therapy and Metformin With or Without One Other Oral Antidiabetic Drug (OAD) (DUAL™ II China) |
| 2017 | NCT03078478 | A Trial Comparing the Efficacy and Safety of Insulin Degludec and Insulin Glargine 300 Units/mL in Subjects With Type 2 Diabetes Mellitus Inadequately Treated With Basal Insulin With or Without Oral Antidiabetic Drugs |
| 2017 | NCT02692716 | A Trial Investigating the Cardiovascular Safety of Oral Semaglutide in Subjects With Type 2 Diabetes |
| 2017 | NCT03179332 | A Trial to Evaluate the Pharmacokinetic and Pharmacodynamic Properties of BioChaperoneÎ Insulin Lispro, FiaspÎ and NovoRapidÎ Delivered by an Insulin Pump |
| 2017 | NCT03292185 | A Trial to Investigate the Single Dose Pharmacokinetics of Insulin Degludec/Liraglutide Compared With Insulin Degludec and Liraglutide in Healthy Chinese Subjects |
| 2017 | NCT03267576 | An Efficacy Study of Canagliflozin or Sitagliptin to Determine Glucose Variability in Mexican Participants With Type 2 DiabetesMellitus Inadequately Controlled on Metformin (COMETA) |
| 2017 | NCT02919345 | Assessment of Dapagliflozin Effect on Diabetic Endothelial Dysfunction of Brachial Artery (ADDENDA) |
| 2017 | NCT03196154 | Association Between Insulin Resistance and Beta Cell Function With HbA1C in Diabetics (InsuReB) |
| 2017 | NCT03167411 | Bexagliflozin Drug/Drug Interaction Study With Exenatide Injection |
| 2017 | NCT03138356 | Bioequivalence Study of Combination Tablets of Saxagliptin / Dapagliflozin / Metformin XR (Extended-release) and Dapagliflozin / Metformin XR Relative to Individual Components in Healthy Subjects |
| 2017 | NCT03078049 | Characteristics of Patients With Type 2 Diabetes Mellitus Receiving Treatment With Dapagliflozin Versus Sitagliptin: An Analysis of Commercial Claims and Linked Laboratory Data |
| 2017 | NCT03430856 | Comparison of Insulin Tregopil (IN-105) With Insulin Aspart in Type 2 Diabetes Mellitus Patients |
| 2017 | NCT03211858 | Comparison of SAR341402 to NovoLog/NovoRapid in Adult Patients With Diabetes Mellitus Also Using Insulin Glargine |
| 2017 | NCT02973477 | Dapagliflozin and Measures of Cardiovascular Autonomic Function in Patients With Type 2 Diabetes (T2D) |
| 2017 | NCT02956811 | Does Dapagliflozin Regress Left Ventricular Hypertrophy In Patients With Type 2 Diabetes? |
| 2017 | NCT04237493 | Dosage Reduction and Acute Glycemic Complications in People With Type 2 Diabetes Who Fast During Ramadan |
| 2017 | NCT03018028 | Dose-response, Safety and Efficacy of Oral Semaglutide Versus Placebo and Versus Liraglutide, All as Monotherapy in Japanese Subjects With Type 2 Diabetes |
| 2017 | NCT02963922 | Effect and Safety of Liraglutide 3.0 mg in Subjects With Overweight or Obesity and Type 2 Diabetes Mellitus Treated With Basal Insulin |
| 2017 | NCT03593135 | Effect of Apple Cider Vinegar in Type 2 Diabetics |
| 2017 | NCT03686722 | Effect of Co-administration of Metformin and Daclatasvir on the Pharmacokinetis and Pharmacodynamics of Metformin |
| 2017 | NCT04426422 | Effect of Metformin on Gut Microbiota Changes and Glycemic Control of Newly Diagnosed Type 2 Diabetes |
| 2017 | NCT03021187 | Efficacy and Safety of Oral Semaglutide Versus Placebo in Subjects With Type 2 Diabetes Mellitus Treated With Insulin |
| 2017 | NCT03086330 | Efficacy and Safety of Semaglutide Once-weekly Versus Placebo as add-on to SGLT-2i in Subjects With Type 2 Diabetes Mellitus |
| 2017 | NCT03061214 | Efficacy and Safety of Semaglutide Once-weekly Versus Sitagliptin Once-daily as add-on to Metformin in Subjects With Type 2 Diabetes (SUSTAIN - CHINA MRCT) |
| 2017 | NCT03136484 | Efficacy and Safety of Semaglutide Versus Canagliflozin as add-on to Metformin in Subjects With Type 2 Diabetes |
| 2017 | NCT03332771 | Efficacy and Safety of Sotagliflozin Versus Glimepiride and Placebo in Subjects With Type 2 Diabetes Mellitus That Are Taking Metformin Monotherapy (SOTA-GLIM) |
| 2017 | NCT03351478 | Efficacy and Safety of Sotagliflozin Versus Placebo and Empagliflozin in Subjects With Type 2 Diabetes Mellitus Who Have Inadequate Glycemic Control While Taking a DPP4 Inhibitor Alone or With Metformin (SOTA-EMPA) |
| 2017 | NCT03066830 | Efficacy and Safety of Sotagliflozin Versus Placebo in Patients With Type 2 Diabetes Mellitus on Background of Sulfonylurea Alone or With Metformin |
| 2017 | NCT03285594 | Efficacy and Safety of Sotagliflozin Versus Placebo in Subjects With Type 2 Diabetes Mellitus Who Have Inadequate Glycemic Control While Taking Insulin Alone or With Other Oral Antidiabetic Agents |
| 2017 | NCT03132181 | Empagliflozin as a Modulator of Systemic Vascular Resistance and Cardiac Output in Patients With Type 2 Diabetes |
| 2017 | NCT03473262 | Empagliflozin-based Quadruple Combination vs Insulin Glarine-based Combination Therapy in Patients With Type 2 Diabetes |
| 2017 | NCT03078101 | EMPRA (EMPagliflozin and RAs in Kidney Disease) |
| 2017 | NCT02689362 | Evogliptin in Type 2 Diabetes Mellitus (EVOLUTION: EVOgLiptina no Diabetes Mellitus TIpO 2) |
| 2017 | NCT02735031 | Exenatide and Impaired Hypoglycaemic Awareness in Type 1 Diabetes |
| 2017 | NCT03013985 | Glargine U300 Hospital Trial |
| 2017 | NCT02964247 | LIRA-ADD2SGLT2i - Liraglutide Versus Placebo as add-on to SGLT2 Inhibitors. |
| 2017 | NCT03233178 | Measurement of Alanine Aminotransaminase (ALT) Following Initiation of Antidiabetic Agents in Patients With Type 2 Diabetes in a Real-world Clinical Setting: a Retrospective Cohort Study |
| 2017 | NCT02917031 | Mechanistic Evaluation of Glucose-lowering Strategies in Patients With Heart Failure |
| 2017 | NCT03095651 | Multiple Ascending Dose Study of MK-5160 in Participants With Type 1 and Type 2 Diabetes Mellitus (MK-5160-002) |
| 2017 | NCT03070704 | Non-interventional, Post Marketing Surveillance Study of Xultophy (Insulin Degludec/Liraglutide) to Evaluate Long Term Safety and Efficacy in Patients With Type 2 Diabetes Mellitus in Routine Clinical Practice in India |
| 2017 | NCT03059056 | Pharmacokinetic Evaluation of Empagliflozin |
| 2017 | NCT02987738 | Pilot Study to Explore the Efficacy of DAPAglifozin as add-on to Closed-loop Control in Patients With Type 1 Diabetes |
| 2017 | NCT03338803 | Real World Glycemic Effectiveness of Linagliptin |
| 2017 | NCT03268005 | Research Study Comparing a New Medicine "Fast-acting Insulin Aspart" to Another Already Available Medicine"NovoRapid"/"NovoLog" in People With Type 2 Diabetes (onset 9) |
| 2017 | NCT03191396 | Research Study Comparing a New Medicine Semaglutide to Liraglutide in People With Type 2 Diabetes |
| 2017 | NCT03084965 | Retrospective Study of Patients With Type 2 Diabetes Mellitus on Dapagliflozin Therapy in Taiwan |
| 2017 | NCT03115112 | Safety and Efficacy of Bexagliflozin Compared to Sitagliptin as Add-on Therapy to Metformin in Type 2 Diabetes Subjects |
| 2017 | NCT03015220 | Safety and Efficacy of Oral Semaglutide Versus Dulaglutide Both in Combination With One OAD (Oral Antidiabetic Drug) in Japanese Subjects With Type 2 Diabetes |
| 2017 | NCT03050229 | SGLT-2i and ARB Combination Therapy in Patients With T2DM and Nocturnal Hypertension (SACRA Study) |
| 2017 | NCT03170544 | Single Ascending Dose Study of MK-1092 in Healthy Participants and in Participants With Type 1 and Type 2 Diabetes Mellitus (MK-1092-001) |
| 2017 | NCT03555565 | Specified Drug-Use Survey of Alogliptin and Metformin Hydrochloride Combination Tablets "Survey on Long-term Use in Type 2 Diabetes Mellitus Patients With Renal or Hepatic Impairment or Advanced Age" |
| 2017 | NCT04149067 | Study of Real-world Evidence With SGLT2i (Dapagliflozin) and DPP4i (Sitagliptin) in Type 2 Diabetes Patients in Spain |
| 2017 | NCT03014479 | Study of the QOL Evaluation of Trelagliptin in Patients With Type 2 Diabetes Mellitus |
| 2017 | NCT03230786 | Study to Evaluate the Efficacy and Safety of KBP-042 in Patients With Type 2 Diabetes |
| 2017 | NCT02971618 | Study With Dapagliflozin |
| 2017 | NCT03009513 | Teneligliptin-Glimepiride DDI Study |
| 2017 | NCT03081676 | The Effect of GIP and GLP-1 on Insulin and Glucagon Secretion in Patients With HNF1A-diabetes Treated With or Without Sulphonylurea (HNF1A-Clamp) |
| 2017 | NCT03329651 | The Interaction Between Metformin and Acute Exercise |
| 2017 | NCT03316690 | The Interaction Between Metformin and Physical Training |
| 2017 | NCT03350984 | Traditional Insulin Scheme for Glycemic Control in Non-Critically Inpatients With Diabetes Mellitus 2 |
| 2017 | NCT03231709 | Treatment Preference for Weekly DPP-4 Inhibitors Versus Daily DPP-4 Inhibitors in Patients With Type 2 Diabetes Mellitus |
| 2017 | NCT03202563 | Trial to Evaluate the Efficacy on Glycemic Variability and Safety of Gemigliptin Compared With Dapagliflozin Added on Metformin Alone or Diabetes Medication Naïve Patient in Type 2 Diabetes Mellitus (Stable II Study) |
| 2017 | NCT03071016 | Usage of Dapagliflozin in the Management of Type-2 Diabetes Mellitus: A Real World Evidence Study in Indian Patients |
| 2018 | NCT03674866 | A Canadian Study of the Effectiveness of Tresiba (Insulin Degludec) After Switching Basal Insulin in a Population With Type 1 or Type 2 Diabetes Mellitus |
| 2018 | NCT03449433 | A Meal Test Study of LY900014 in Participants With Type 1 Diabetes Mellitus |
| 2018 | NCT03723759 | A Research Study Looking at How Faster Aspart Injected in Double Concentration Works in the Body of People With Type 1 Diabetes Mellitus |
| 2018 | NCT03492580 | A Study for Comparison of Canagliflozin Versus Alternative Antihyperglycemic Treatments on Risk of Heart Failure Hospitalization and Amputation for Participants With Type 2 Diabetes Mellitus and the Subpopulation With Established Cardiovascular Disease |
| 2018 | NCT03367377 | A Study of LY3209590 in Participants With Type 2 Diabetes |
| 2018 | NCT03433677 | A Study of LY900014 and Insulin Lispro With an External Continuous Subcutaneous Insulin Infusion System in Adult Participants With Type 1 Diabetes (PRONTO-Pump) |
| 2018 | NCT03465878 | A Study of LY900014 in Participants With Type 1 Diabetes Mellitus |
| 2018 | NCT03495102 | A Study of the Efficacy and Safety of Dulaglutide (LY2189265) in Participants With Type 2 Diabetes (AWARD-11) |
| 2018 | NCT03407599 | A Trial Comparing the Pharmacokinetic Properties of Fast-acting Insulin Aspart Between Children, Adolescents and Adults With Type 1 Diabetes |
| 2018 | NCT03512236 | A Trial to Investigate Pharmacokinetics, Pharmacodynamics, Safety and Tolerability of BioChaperone Pramlintide Insulin in Patients With Type 1 Diabetes Mellitus |
| 2018 | NCT03786406 | An International Survey of the Occurrence of Diseases That Affects the Heart and Blood Vessels Among People With Type 2 Diabetes |
| 2018 | NCT03771781 | Bioequivalence Study of Empagliflozin Tablet in Healthy Participants. |
| 2018 | NCT02694263 | Canagliflozin (Invokana™) vs. Standard Dual Therapy Regimen for T2DM During Ramadan (Can Do) |
| 2018 | NCT03462069 | Comparison of Pharmacodynamic Effects of Sotagliflozin and Empagliflozin in T2DM Patients With Mild to Moderate Hypertension |
| 2018 | NCT03407196 | Dapagliflozin in Type 2 Diabetes Patients, a Retrospective Cohort Study From Turkey |
| 2018 | NCT03604419 | Dose-finding of PB-119 Administered Subcutaneously Once Weekly Versus Placebo in Subjects With Type 2 Diabetes |
| 2018 | NCT03693560 | Effect of Adding Vildagliptin vs Glimepiride to Metformin on Inflammation's Markers in Type-2 Diabetic Patients With CAD |
| 2018 | NCT03416127 | Effect of Propolis or Metformin Administration on Glycemic Control in Patients With Type 2 Diabetes Mellitus |
| 2018 | NCT03707171 | Effects of Liraglutide on the Cognitive Function in Patients With Type 2 Diabetes Mellitus |
| 2018 | NCT04023344 | Efficacy and Safety of Insulin Lispro Biphasic 25 Compared to Humalog® Mix 25 in Type 2 Diabetes Mellitus Patients |
| 2018 | NCT04022993 | Efficacy and Safety of Insulin RinGlar Compared to Lantus SoloStar in Type 1 Diabetes Mellitus Patients |
| 2018 | NCT03529123 | Efficacy and Safety of the Insulin Glargine/Lixisenatide Fixed Ratio Combination Versus Insulin Glargine in Patients With Type 2 Diabetes (LixiLan-India) |
| 2018 | NCT03796975 | Efficacy of Pioglitazone Hydrochloride and Metformin Hydrochloride Tablets on the Patients With Newly Diagnosed Type 2 Diabetes Mellitus Combined With Non-alcoholic Fatty Liver Disease |
| 2018 | NCT03554486 | Evaluation of Fiasp® (Fast Acting Insulin Aspart) in 670G Hybrid Closed-Loop Therapy |
| 2018 | NCT03841591 | Maternal Weight Gain in Gestational Diabetes Controlled by Metformin Versus Insulin |
| 2018 | NCT03760068 | Mylan Insulin Aspart Study |
| 2018 | NCT03766724 | Pharmacokinetic and Pharmacodynamic Drug-Drug Interaction of Evogliptin and Empagliflozin or Dapagliflozin in Healthy Male Adults |
| 2018 | NCT03406000 | Phase 4 Study to Evaluate Treatment Optimization With Once-daily Insulin Glargine 300 U/mL |
| 2018 | NCT03775902 | Regulation of KATP Channels and Na+/K+ ATPase in Relation to Fatigue Development |
| 2018 | NCT03638778 | Research Study Comparing Different Tablets With the Study Medicine Semaglutide in Healthy Men |
| 2018 | NCT03745157 | RESILIENT: A Research Study, Looking at How Ryzodeg® Works in People With Type 2 Diabetes in Local Clinical Practice in Japan (RESILIENT) |
| 2018 | NCT03436498 | Safety Assessment of SAR341402 and NovoLog® Used in Continuous Subcutaneous Insulin Infusion for Type 1 Diabetes Mellitus Patients |
| 2018 | NCT04017221 | Safety of Sodium-glucose Cotransporter 2 (SGLT2) Inhibitors Among Patients With Type 2 Diabetes |
| 2018 | NCT03359590 | Sitagliptin and the Risk for Hypoglycaemia in Type 2 Diabetes Patients |
| 2018 | NCT03444584 | Study of MEDI0382 in Combination With Dapagliflozin and Metformin in Overweight/Obese Participants With Type 2 Diabetes |
| 2018 | NCT03705195 | Study of Sulphonylurea Synergy With Incretins (LOGIC) |
| 2018 | NCT03717688 | The Effects of Neprilysin on Glucagon-like Peptide-1 |
| 2019 | NCT03903016 | A Bioequivalence Study Comparing Two Different Strengths Formulations of Insulin Lispro in Patients With Type 1 Diabetes |
| 2019 | NCT03922750 | A Research Study in People With Type 2 Diabetes to Compare Two Types of Insulin: Insulin 287 and Insulin Glargine |
| 2019 | NCT03723759 | A Research Study Looking at How Faster Aspart Injected in Double Concentration Works in the Body of People With Type 1 Diabetes Mellitus |
| 2019 | NCT03951805 | A Research Study to Compare Two Types of Insulin: Insulin 287 and Insulin Glargine in People With Type 2 Diabetes Who Have Not Used Insulin Before |
| 2019 | NCT03789578 | A Research Study to Look at How Insulin 287 and Semaglutide Work in the Body of People With Type 2 Diabetes When Taken Alone or Together |
| 2019 | NCT03598621 | A Research Study to Look at Similarity Between Semaglutide Versions in Different Injection Tools |
| 2019 | NCT03830281 | A Study Comparing LY900014 to Insulin Lispro (Humalog) in Adults With Type 1 Diabetes Using Insulin Pump Therapy (PRONTO-Pump-2) |
| 2019 | NCT03960814 | A Study of All-Cause and Cardiovascular Mortality in Type 2 Diabetes Patients Using Basal Insulin Detemir and Glargine |
| 2019 | NCT03760640 | A Study of LY900014 in a Medtronic Pump |
| 2019 | NCT03797885 | A Study of People With Type 2 Diabetes Who Have Diseases That Affect the Heart and Blood Vessels. The Study Will Also Look at the Treatment of a Group of These People in Hospitals in Portugal |
| 2019 | NCT03965013 | A Study to Look at How Safe NNC0268-0965 is in Healthy People and People With Type 1 Diabetes |
| 2019 | NCT04136067 | A Study to Look at How Safe NNC0268-0965 is in People With Type 2 Diabetes |
| 2019 | NCT03604224 | A Study to Observe Clinical Effectiveness of Canagliflozin 300 mg Containing Treatment Regimens in Indian Type 2 Diabetes Participants With BMI>25 kg/m^2, in Real World Clinical Setting |
| 2019 | NCT03172494 | A Trial Comparing Insulin Degludec/Liraglutide, Insulin Degludec, and Liraglutide in Chinese Subjects With Type 2 Diabetes Inadequately Controlled on Oral Antidiabetic Drugs (OADs) |
| 2019 | NCT03916640 | A Trial to Assess a Co-formulation of an Insulin Analog and Pramlintide in Subjects With Type 1 Diabetes Mellitus |
| 2019 | NCT03959514 | AT247, NovoRapid and Fiasp in Glucose Clamp Study |
| 2019 | NCT03874715 | Comparison of SAR341402 to NovoLog in Adult Patients With Type 1 Diabetes Mellitus Also Using Insulin Glargine (GEMELLI X) |
| 2019 | NCT03790839 | Drug Interaction Study Between Dorzagliatin and Sitagliptin |
| 2019 | NCT03928340 | Effect of Adding Metformin to Insulin Therapy on Pregnancy Outcomes in Women With Uncontrolled Type I Diabetes. |
| 2019 | NCT04120259 | Effect of Apple Cider Vinegar and Metformin Combination vs Metformin Alone in Type 2 Diabetics |
| 2019 | NCT03982238 | Effects of Hypoglycemic Drugs on Testosterone Levels in Type 2 Diabetes Patients |
| 2019 | NCT03889210 | hydroxybutyrate, Glucose Metabolism and Prediabetes |
| 2019 | NCT04198948 | Interaction Between Omeprazole and Gliclazide in CYP2C19 Normal/ Ultrarapid Metabolisers (INTERGLIKOM) |
| 2019 | NCT04061473 | Involvement of Dipeptidyl Peptidase-4 and Sodium-glucose Co-transporter-2 in Extrapancreatic Glucagon Secretion |
| 2019 | NCT04235439 | PK/PD Biosimilarity Study of Gan & Lee Insulin Lispro Injection vs. EU and US Humalog® in Healthy Males |
